# Supplementary material
Source: PubMed Central journal article supplement (PMC3702171)

## ***Supporting Data***

### **Structure-Activity Relationships of Lipopolysaccharide Sequestration in Guanylhydrazone-bearing Lipopolyamines**

*Wenyan Wu, Diptesh Sil, Michal L. Szostak, Lakshmi S. Malladi,  
Hemamali J. Warshakoon,  
Matthew R. Kimbrell, Jens R. Cromer, Sunil A. David\**

<sup>1</sup>H, <sup>13</sup>C NMR, and Mass-Spectral Data  
of all key intermediates and final compounds  
and  
LC-MS Data of final compounds

# <sup>1</sup>H NMR Spectrum

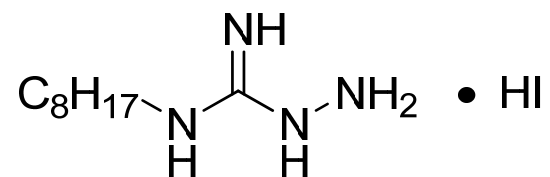

3.23  
3.21  
3.19

1.61  
1.59

1.37  
1.33

0.93  
0.91

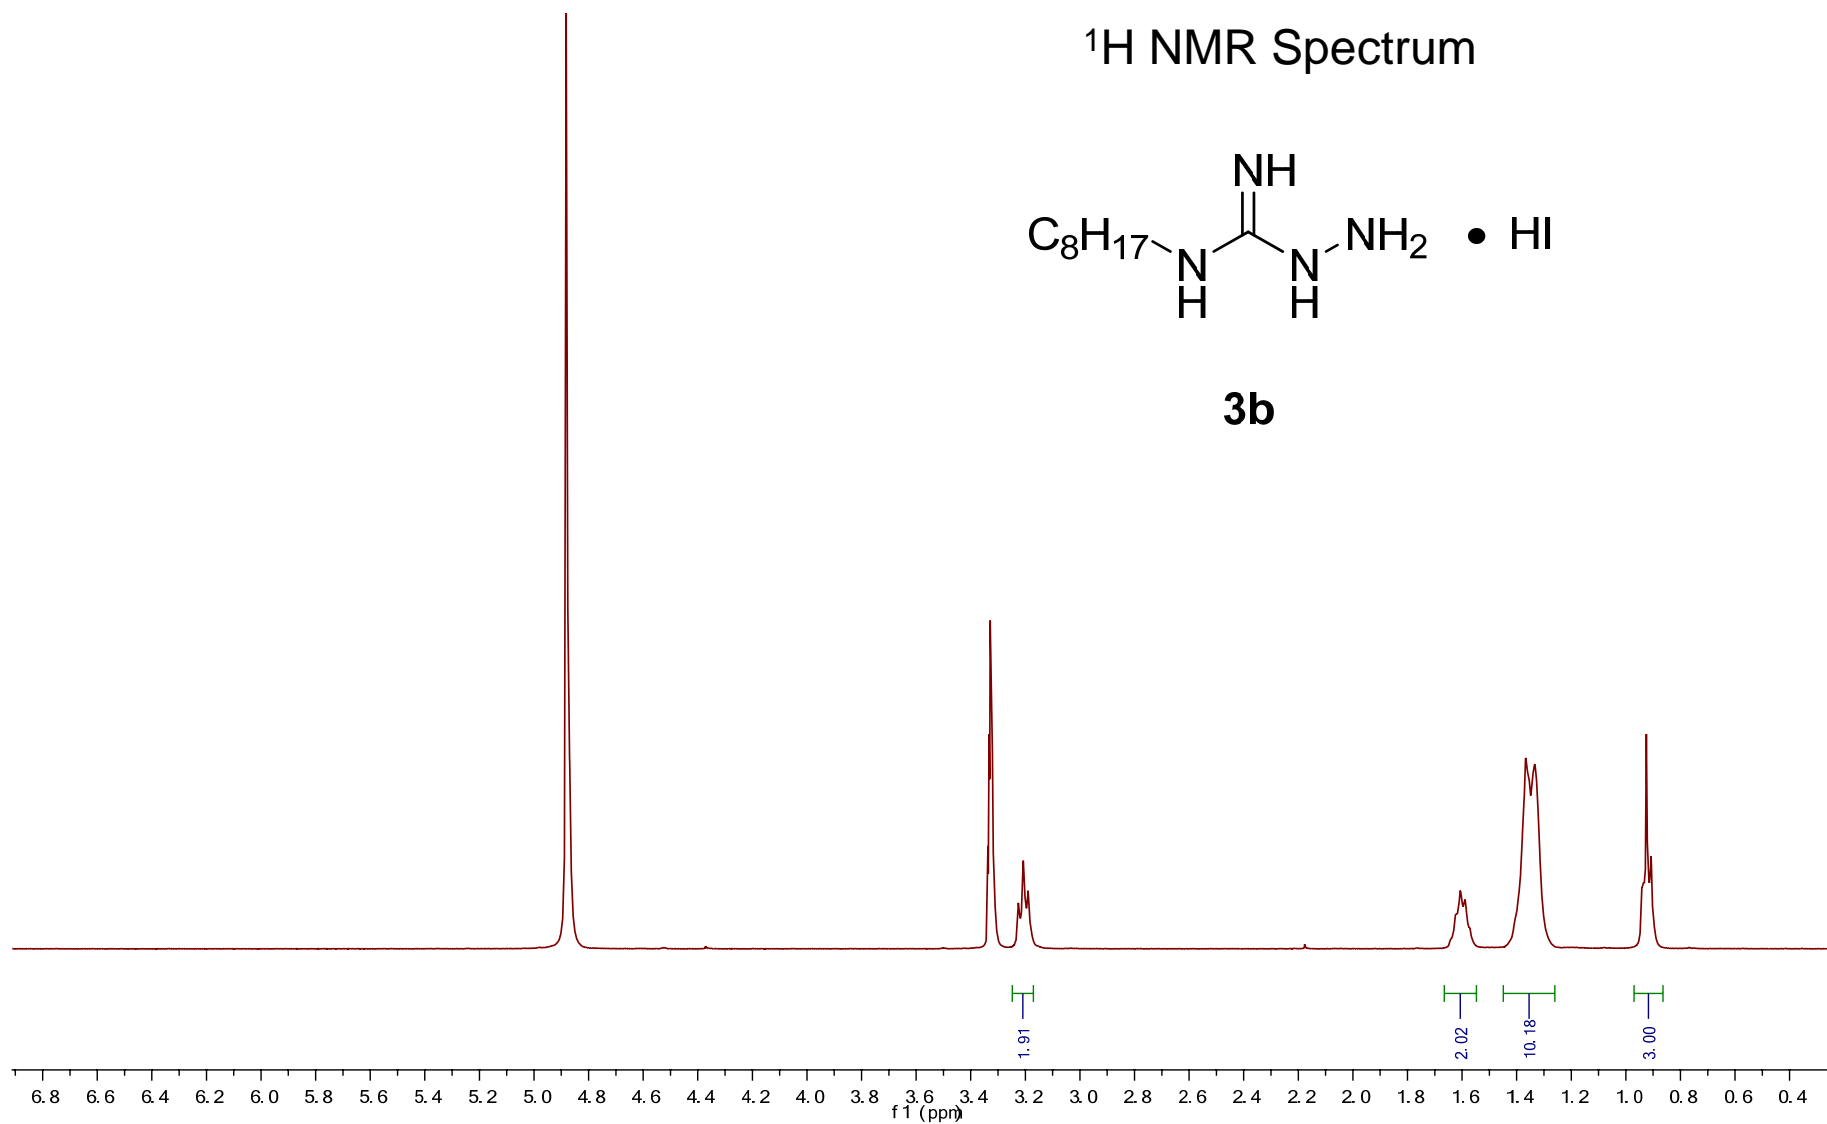

— 159.68

# <sup>13</sup>C NMR Spectrum

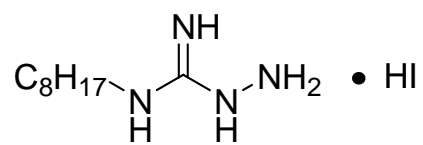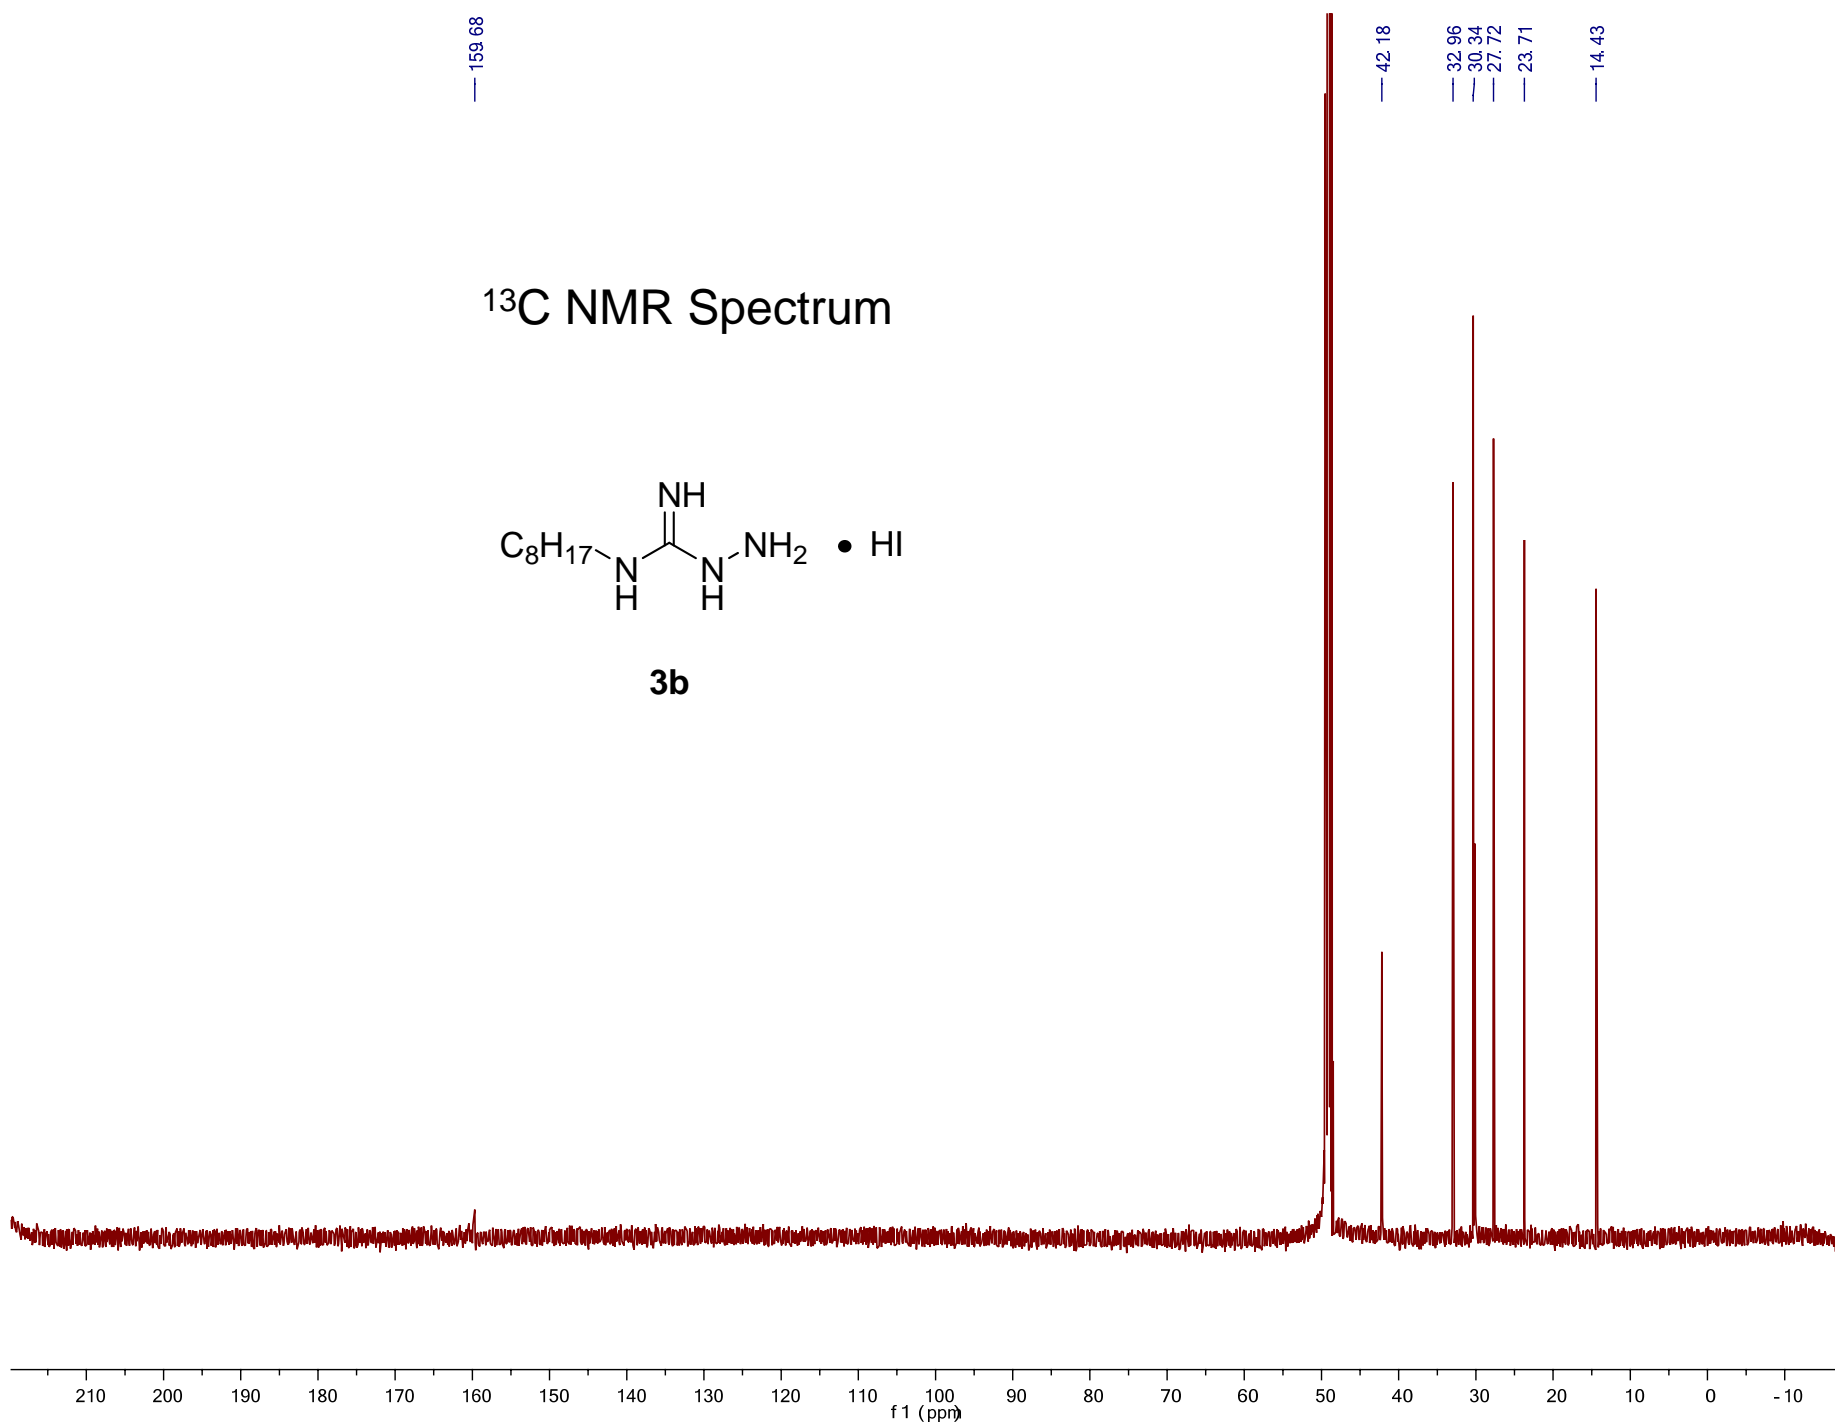

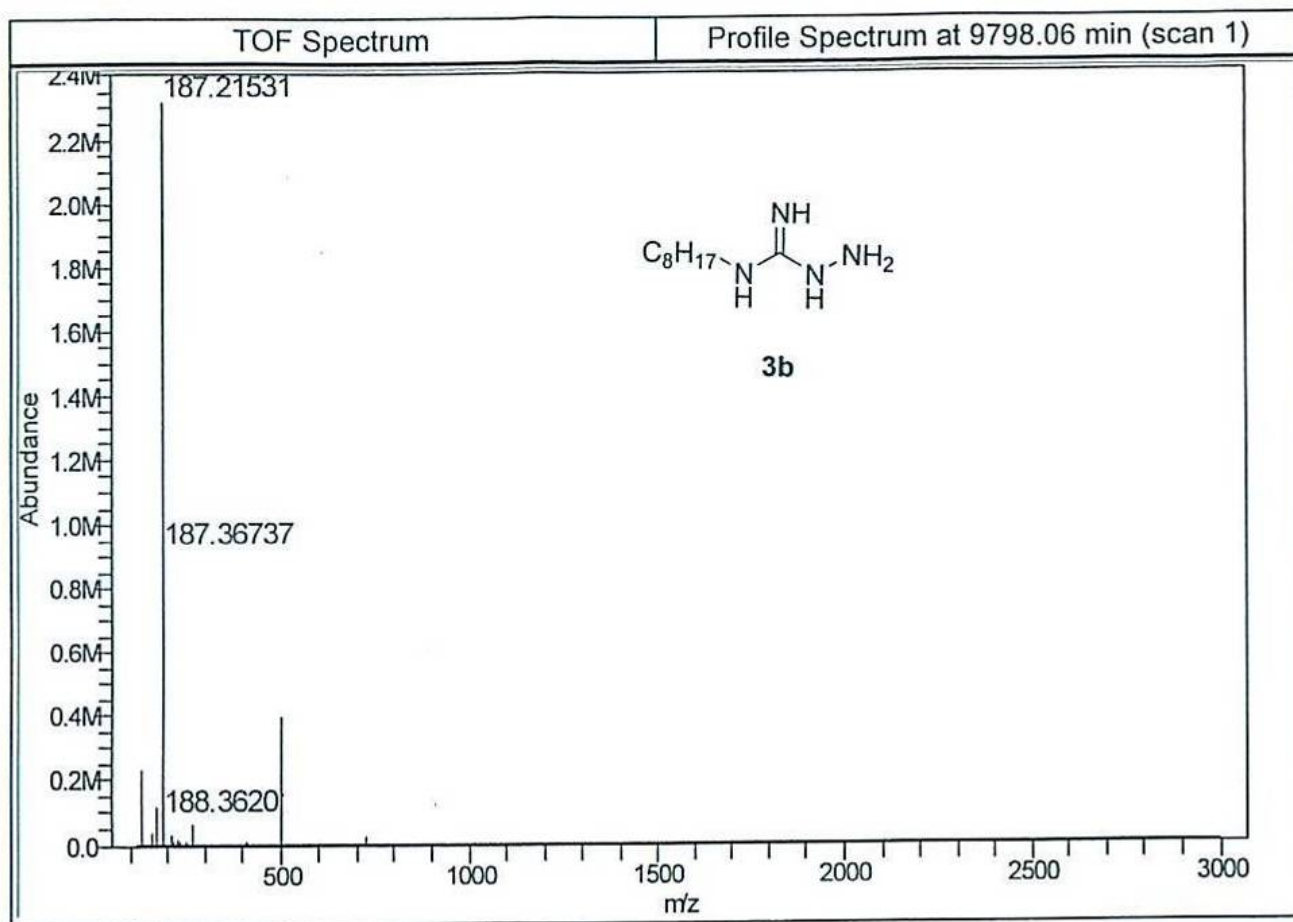

# <sup>1</sup>H NMR Spectrum

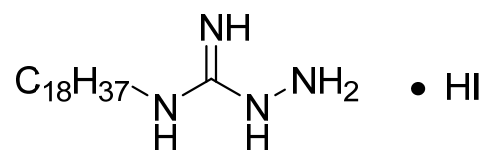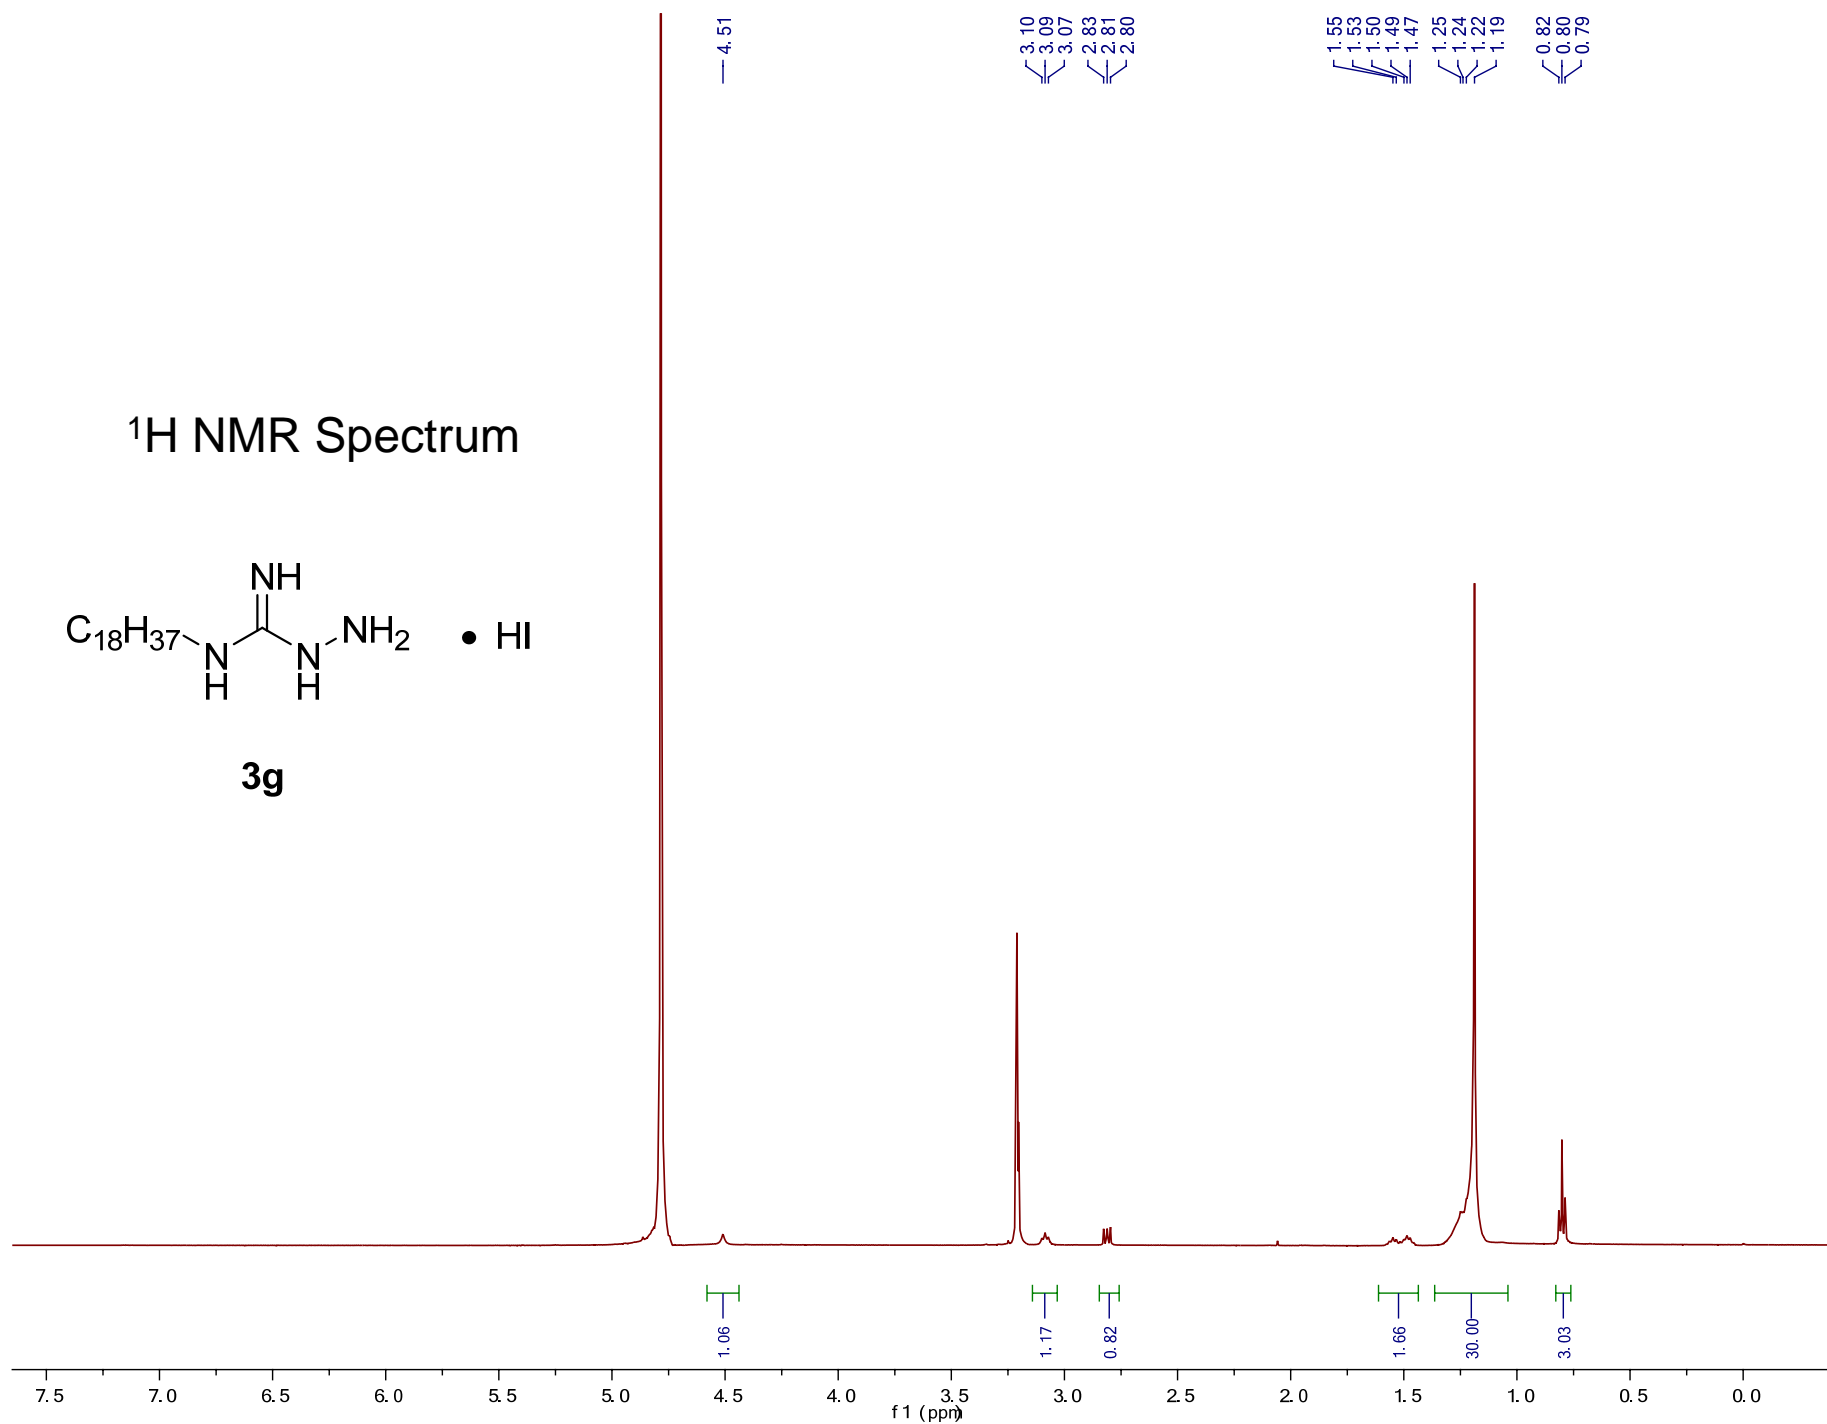

— 152.67

### $^{13}\text{C}$ NMR Spectrum

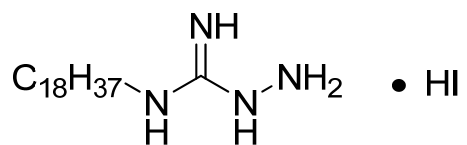

**3g**

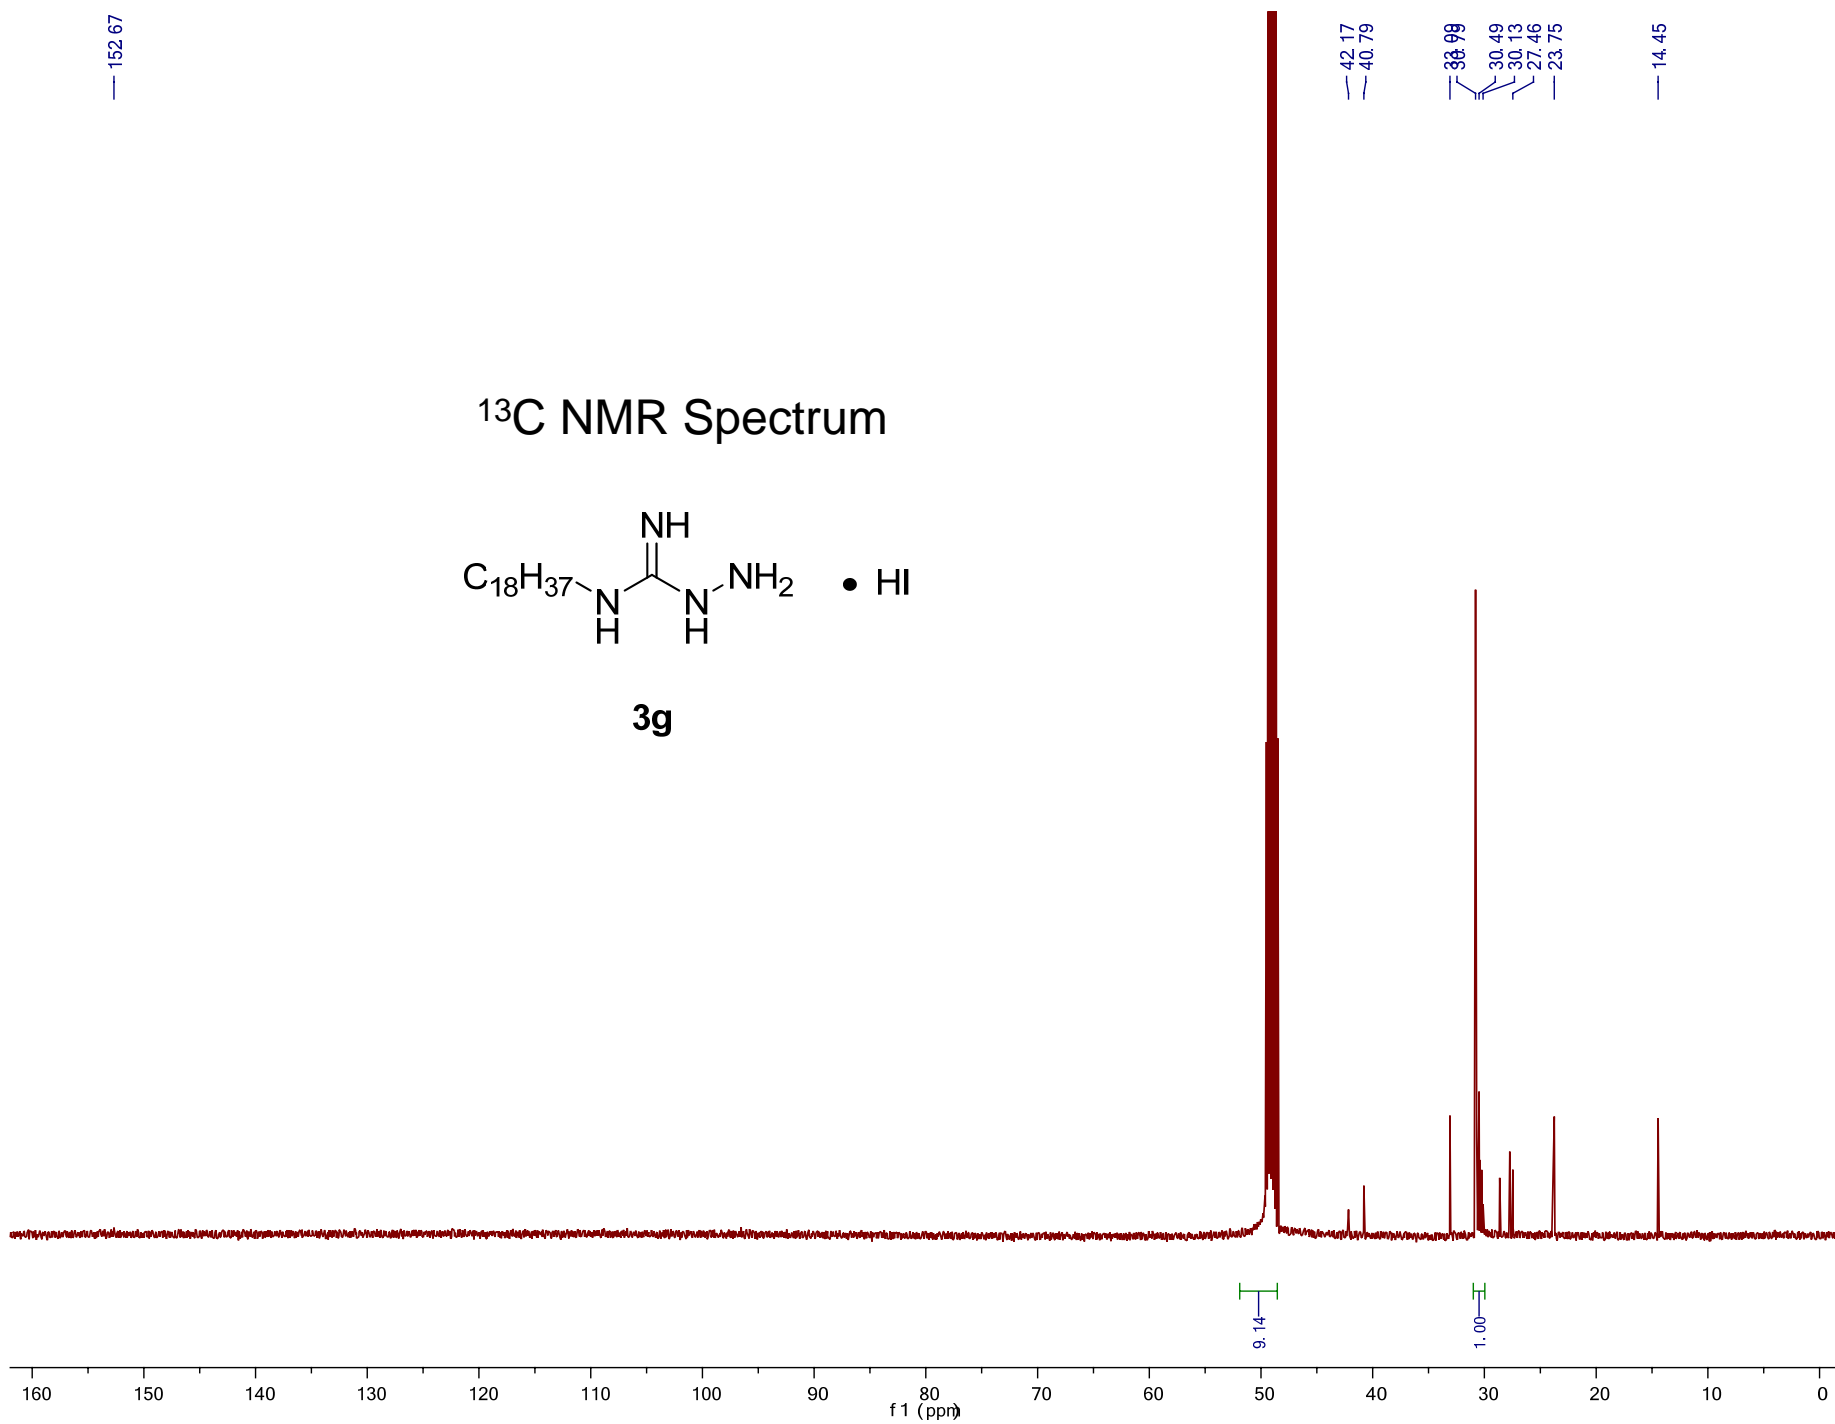

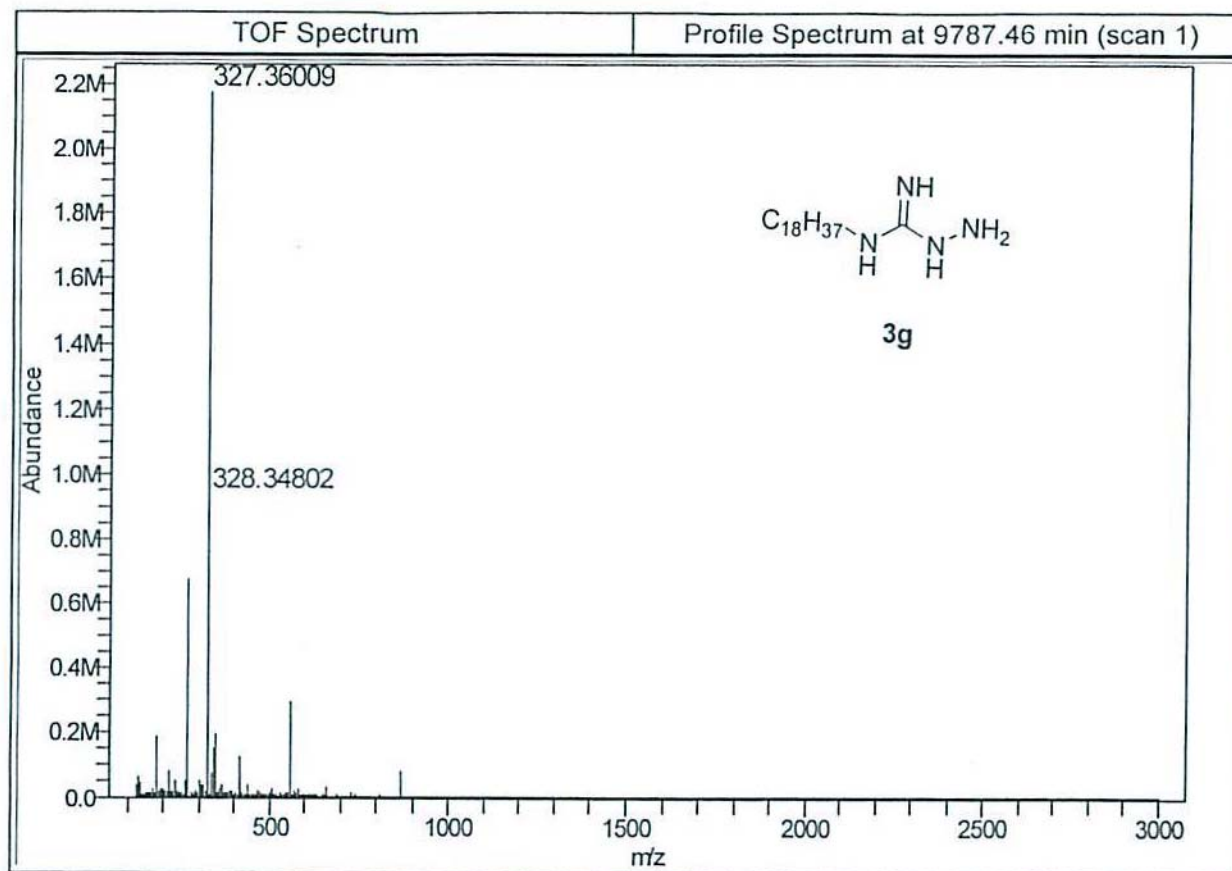

# <sup>1</sup>H NMR Spectrum

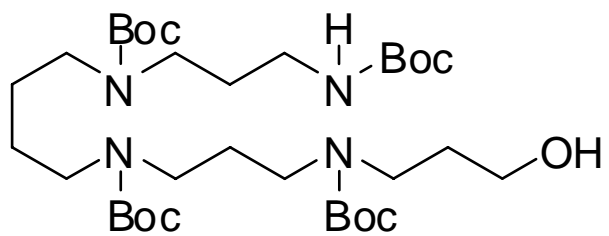

**5**

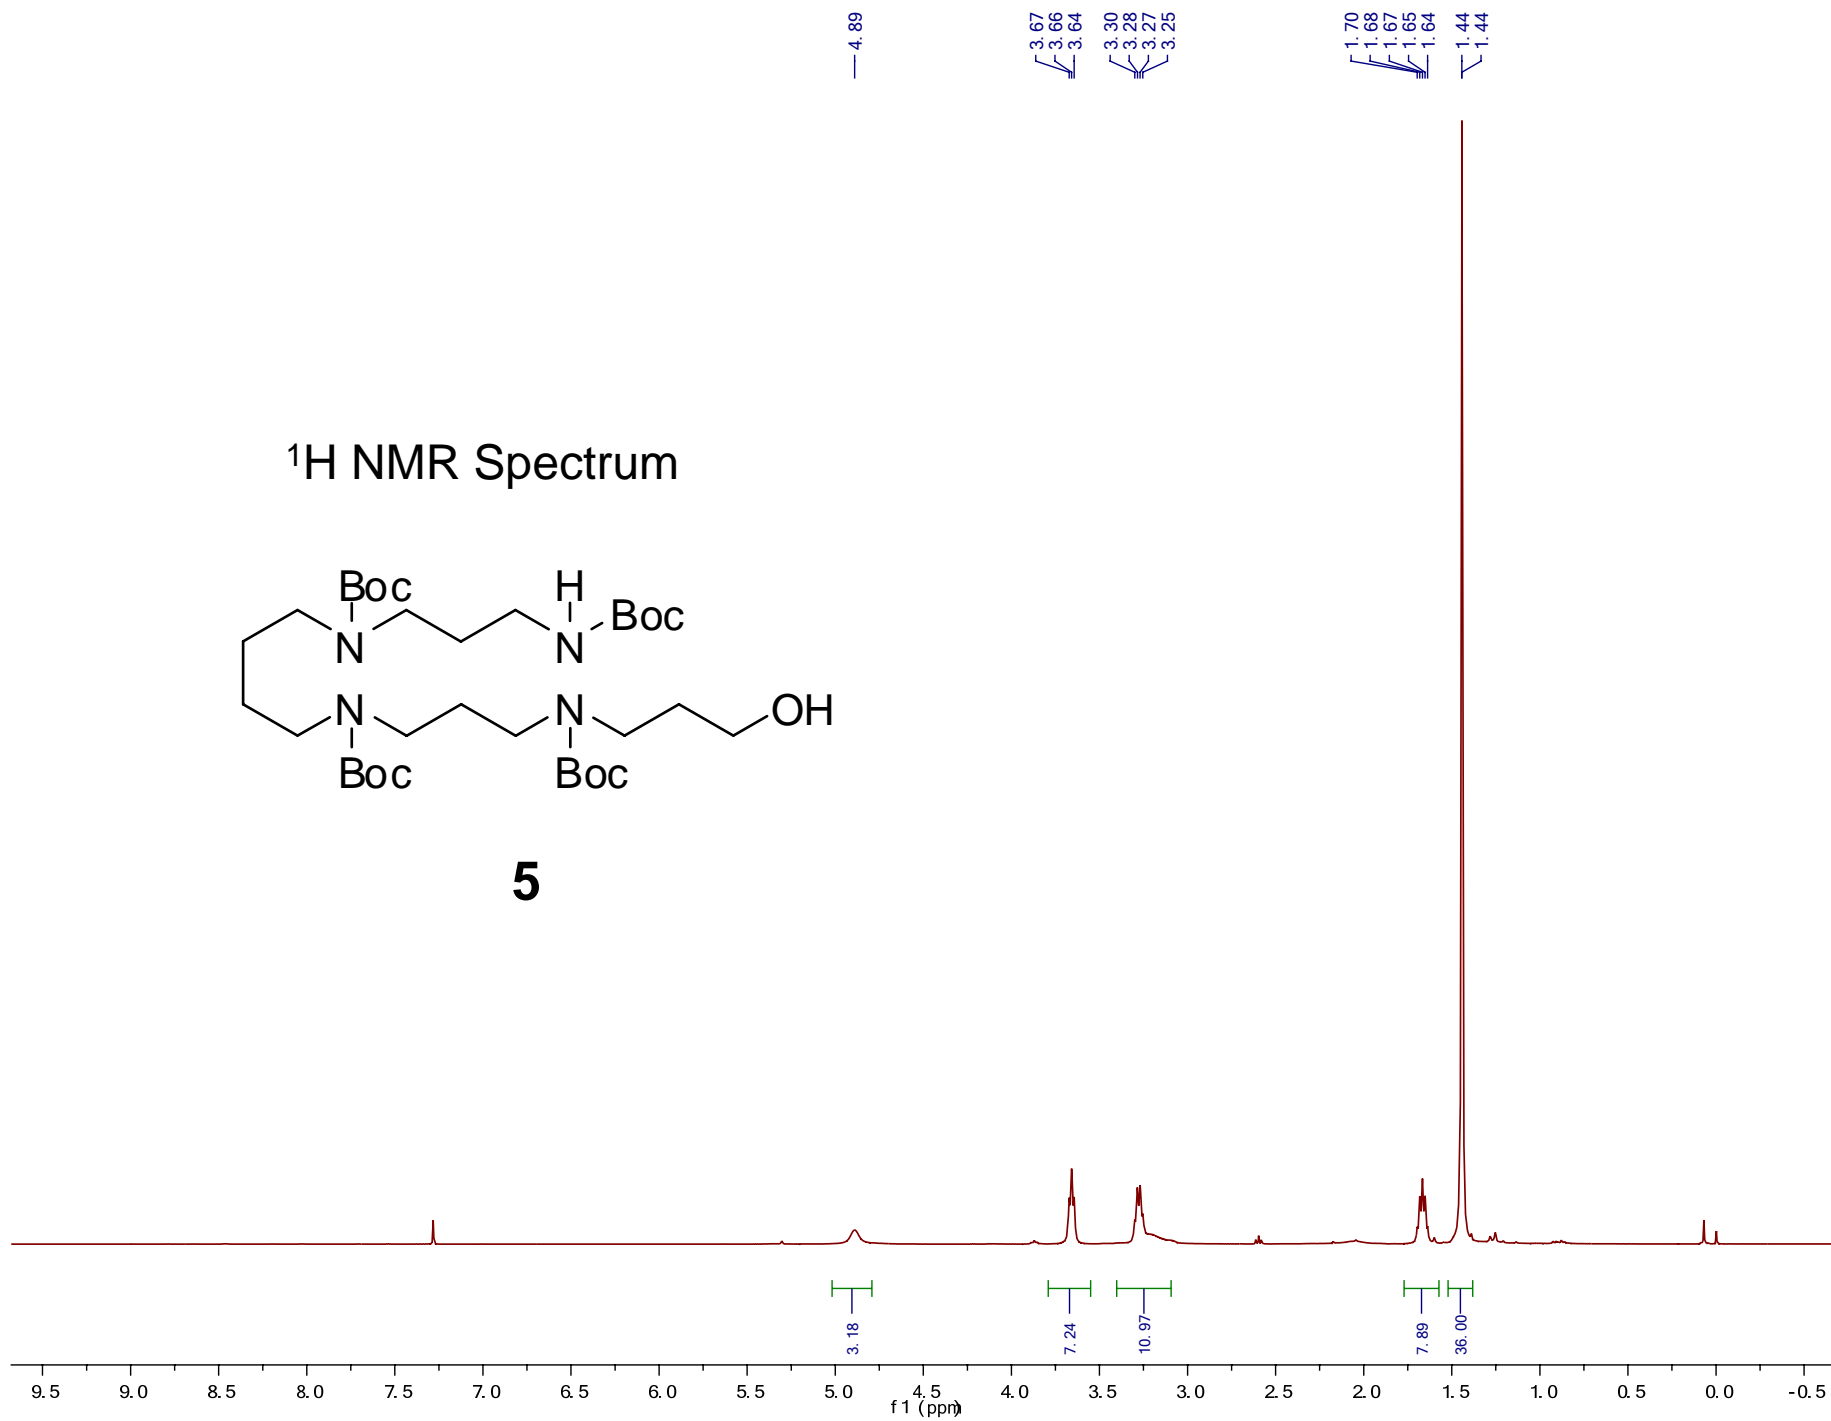



— 156.20

— 78.60

— 58.16

— 35.86

— 31.81

27.42  
27.34

### <sup>13</sup>C NMR Spectrum

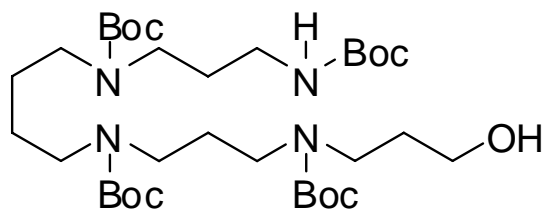

**5**

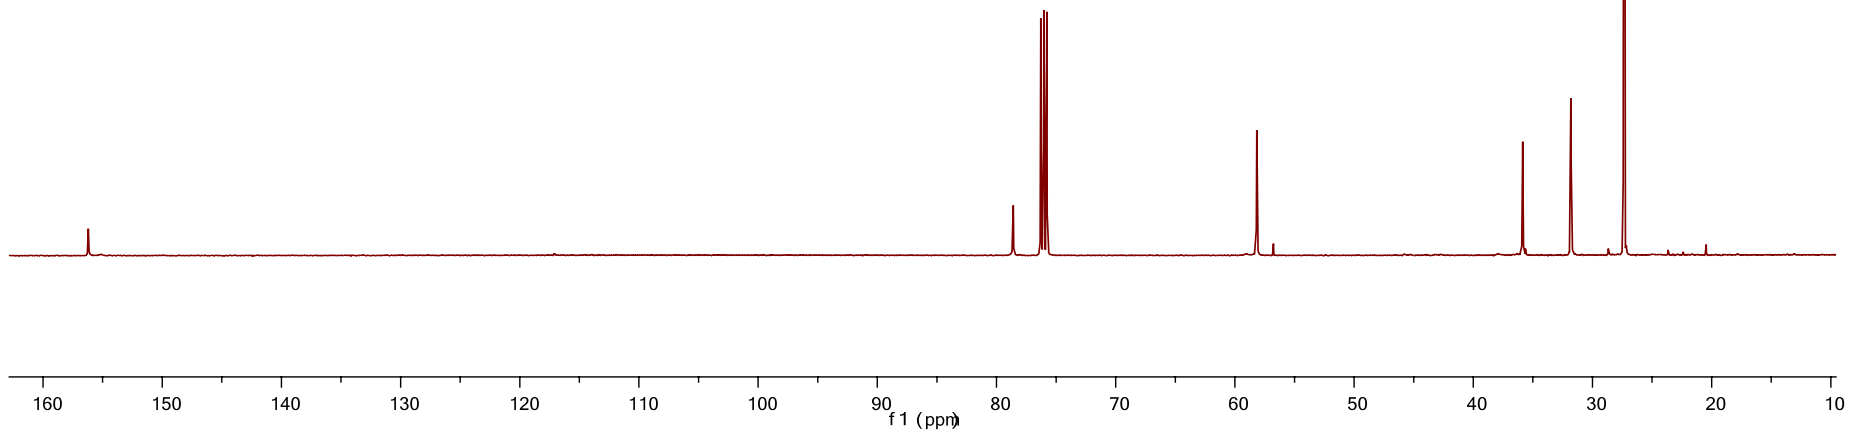

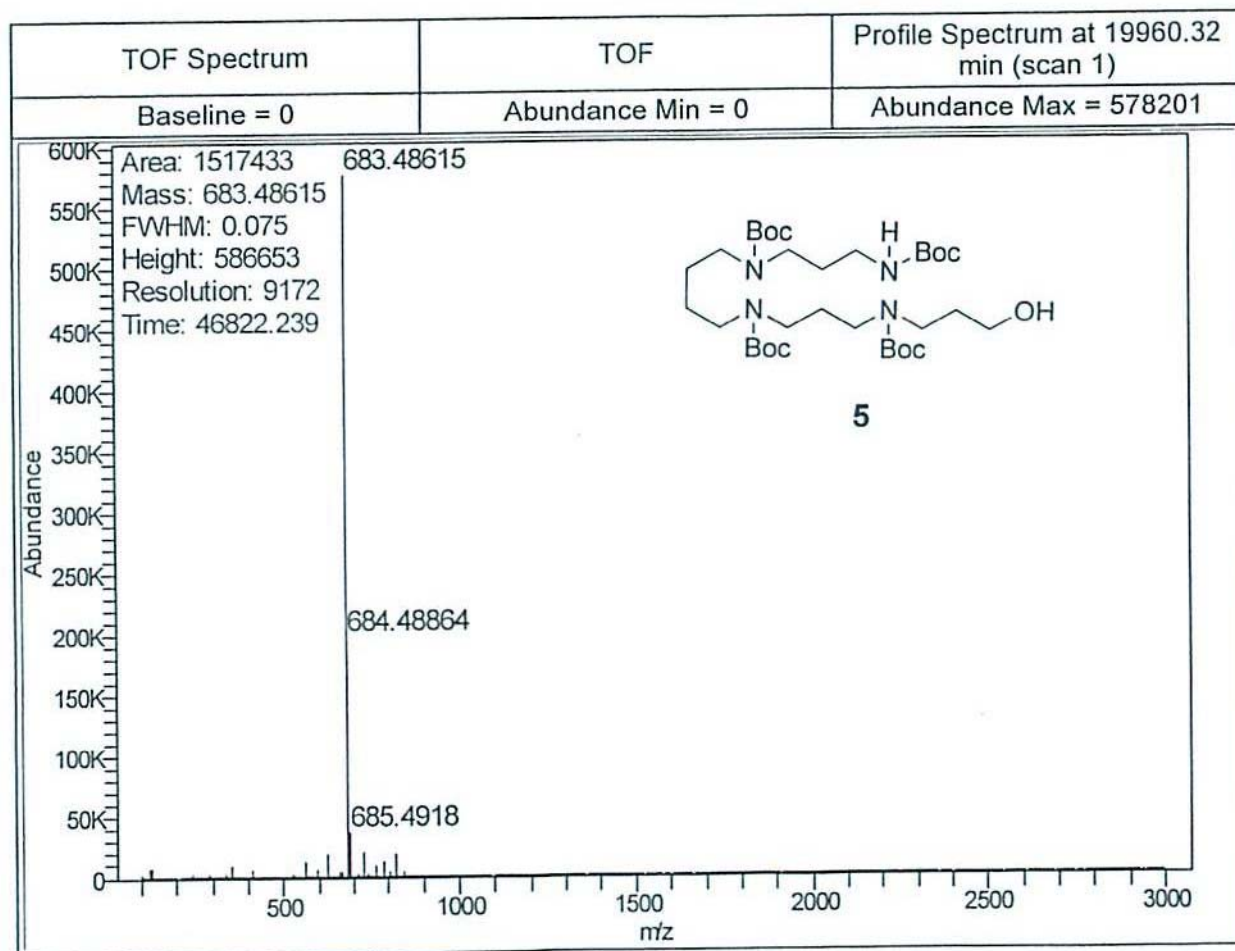

# <sup>1</sup>H NMR Spectrum

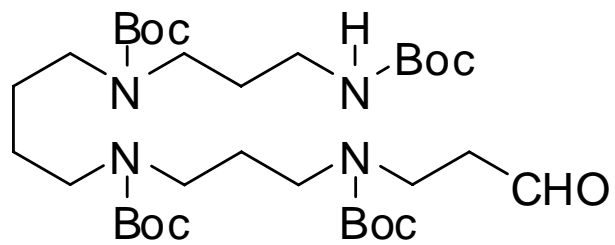

**6**

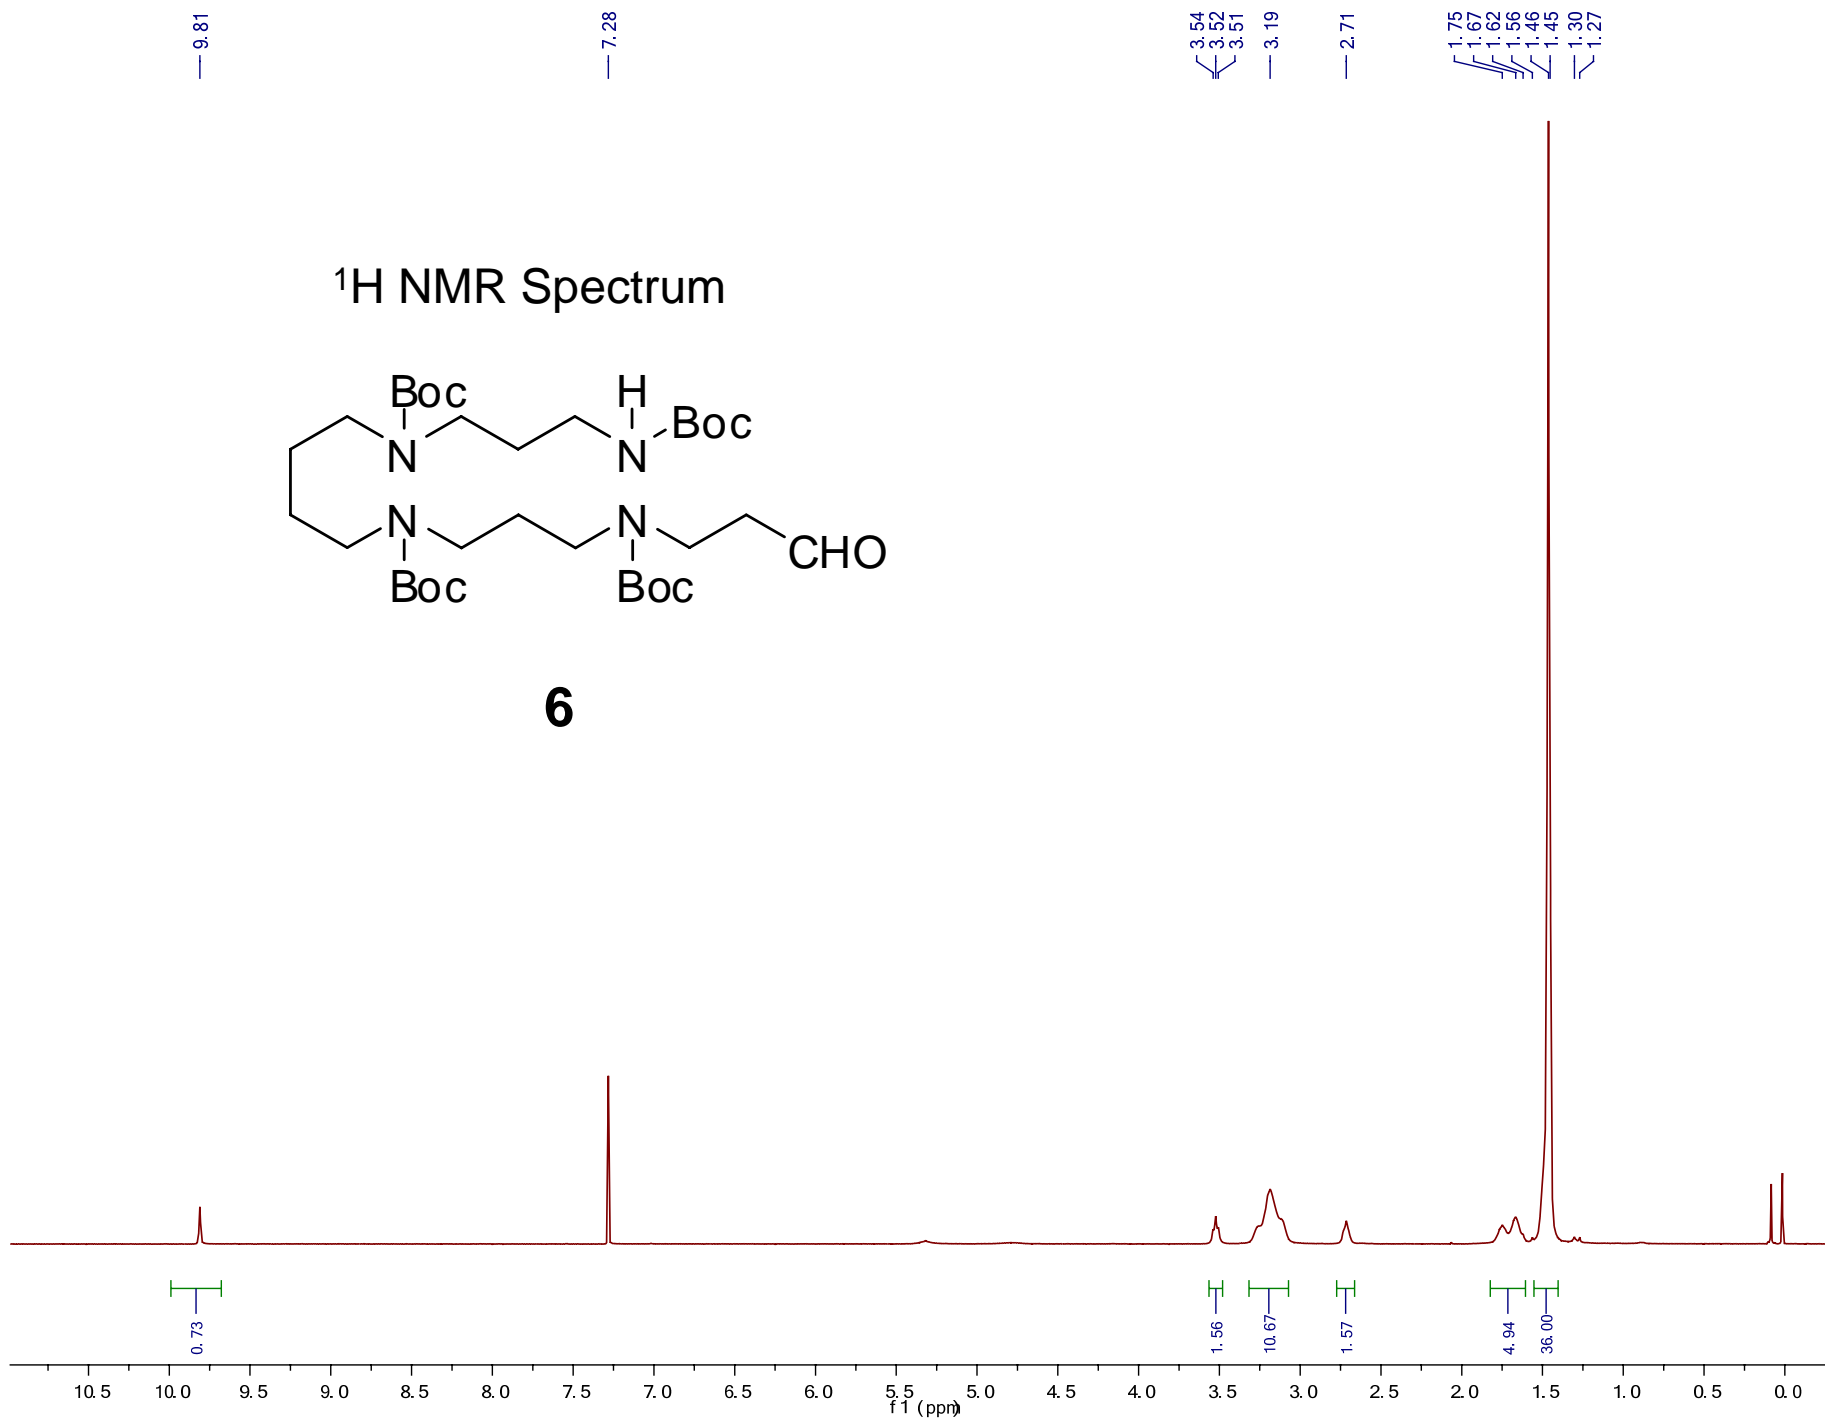

— 199.95

155.09  
154.42

78.93  
78.37

45.80  
45.51  
44.76  
44.15  
43.61  
43.12  
42.64  
42.29  
40.05  
36.28  
27.87  
27.46  
27.42  
27.39  
27.26  
25.00  
24.55

### $^{13}\text{C}$ NMR Spectrum

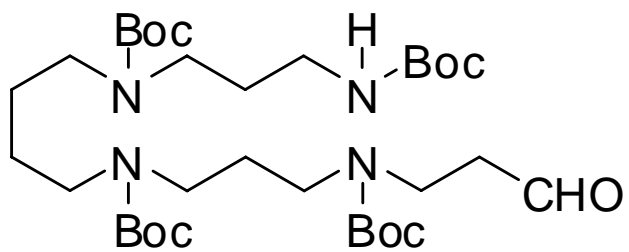

**6**

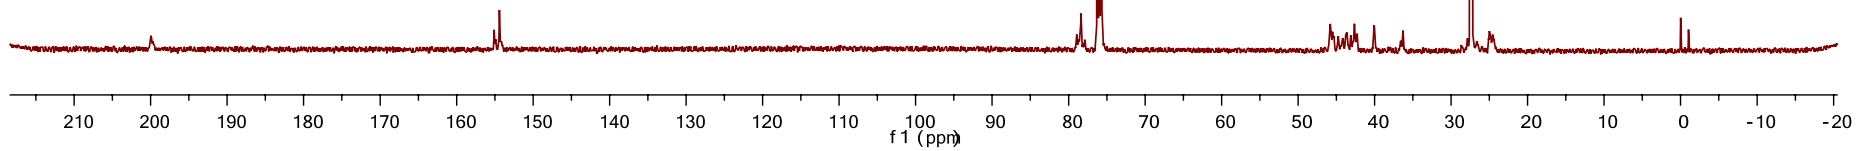

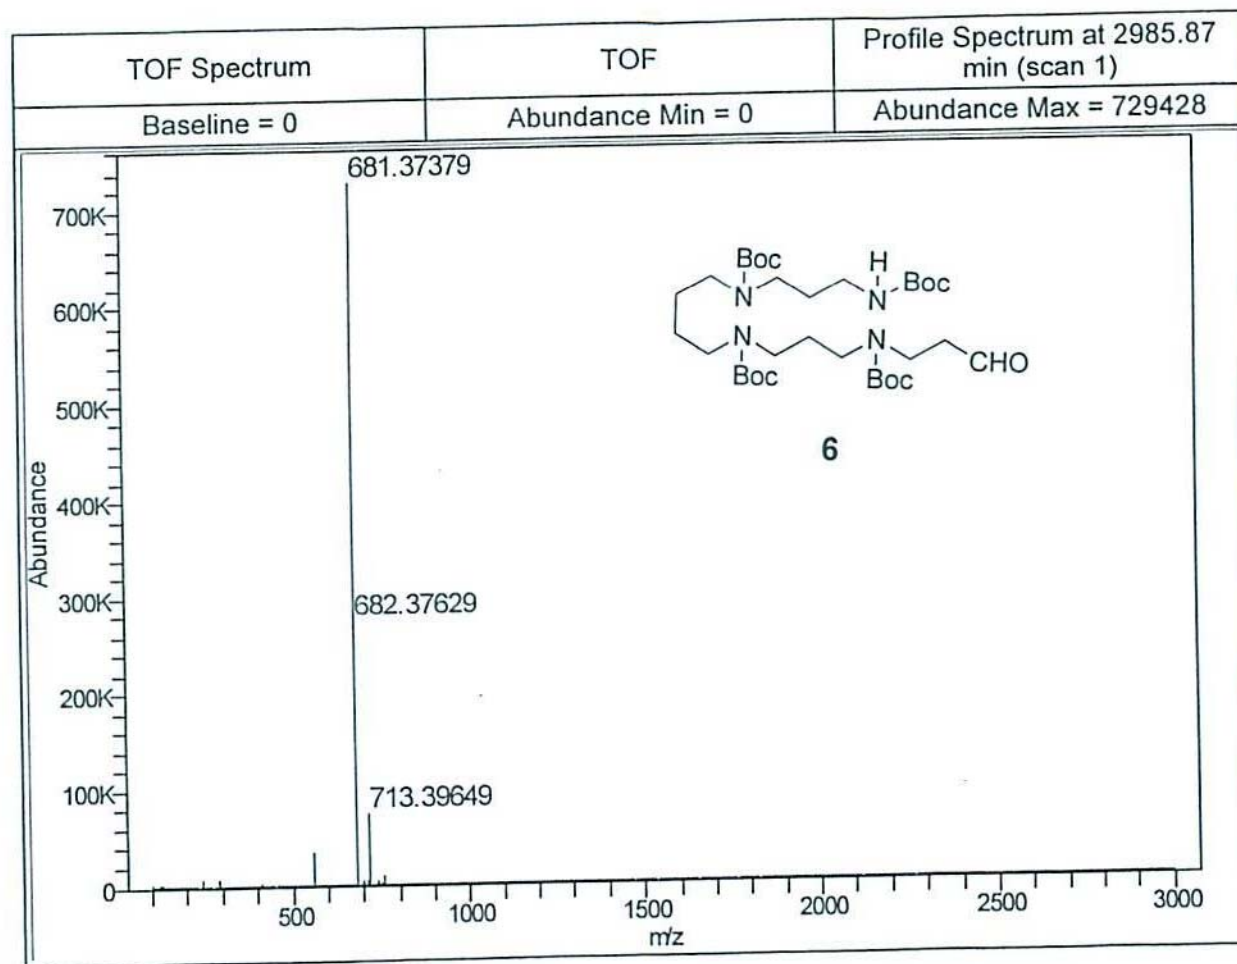

—7.49

3.50  
3.48  
3.47  
3.45  
3.16  
3.09

2.51  
2.50

1.73  
1.65  
1.44  
1.43

# $^1\text{H}$ NMR Spectrum

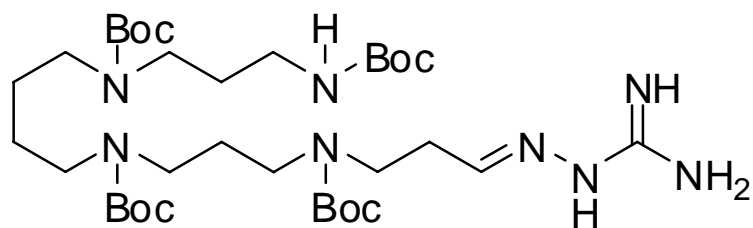

**7a**

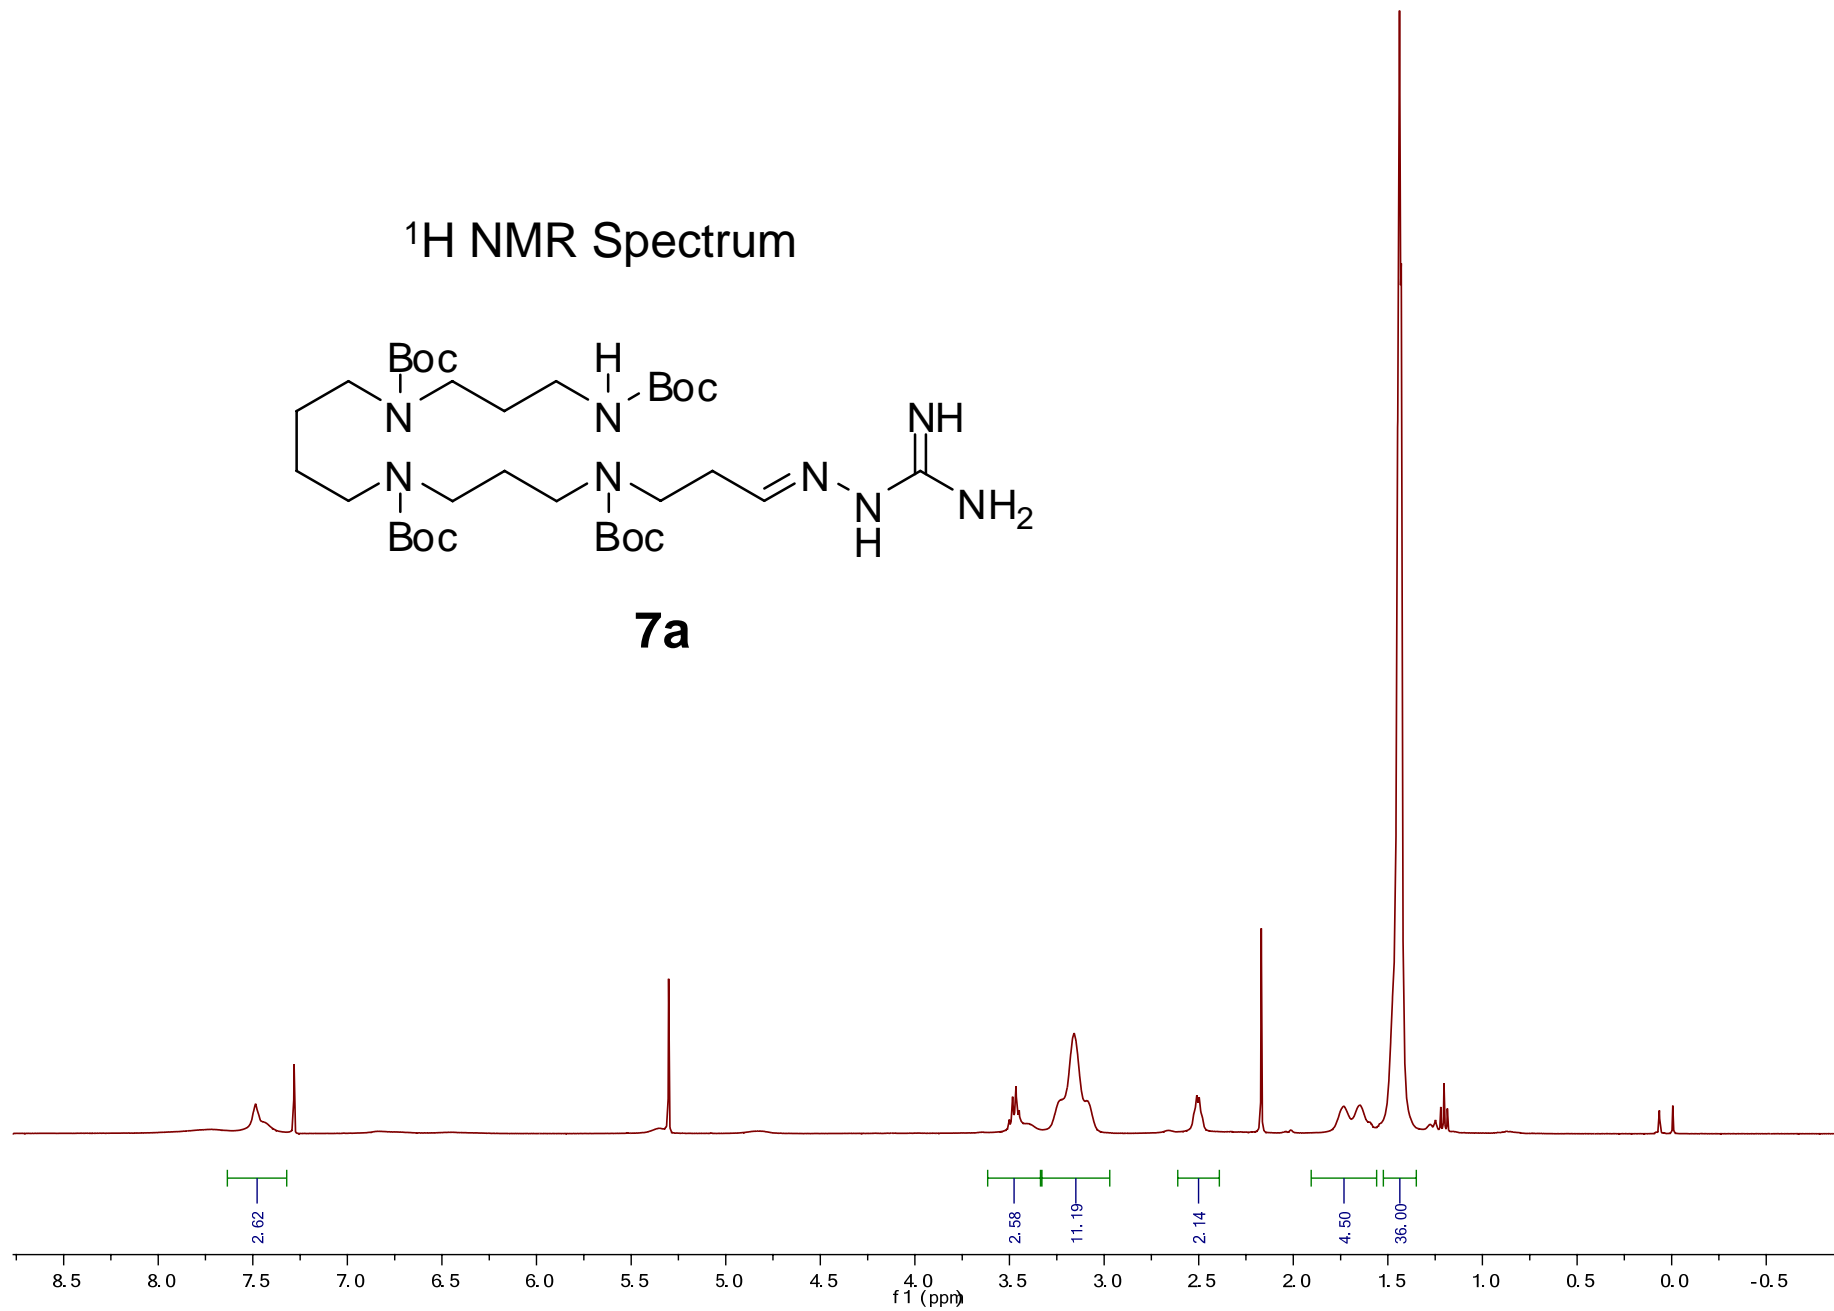











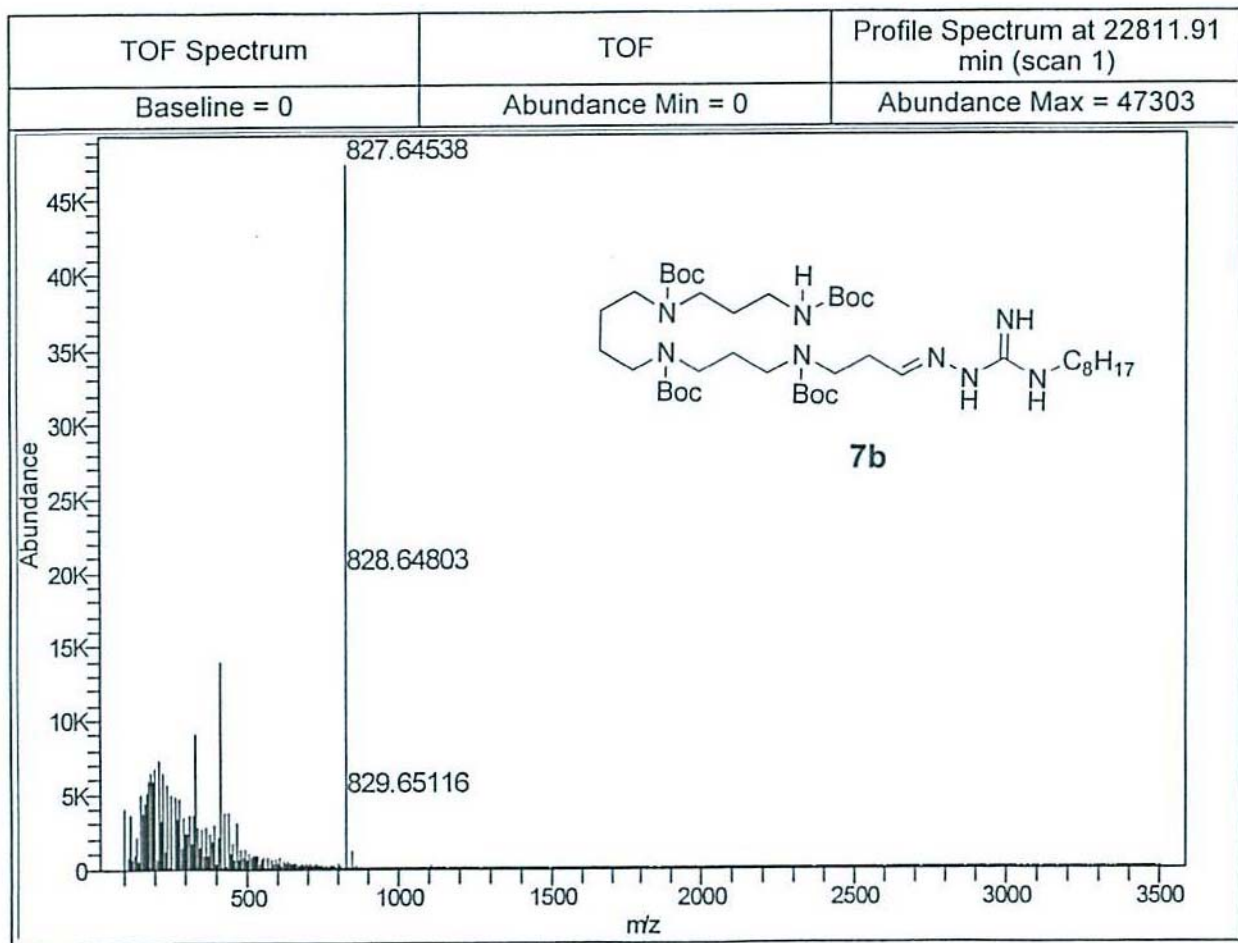

# <sup>1</sup>H NMR Spectrum

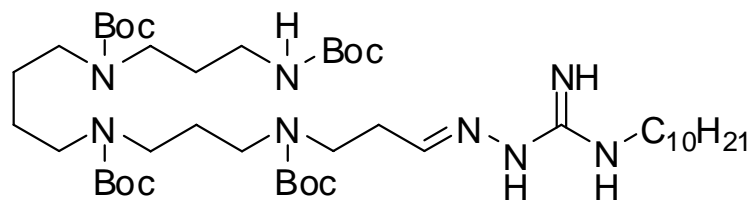

7c

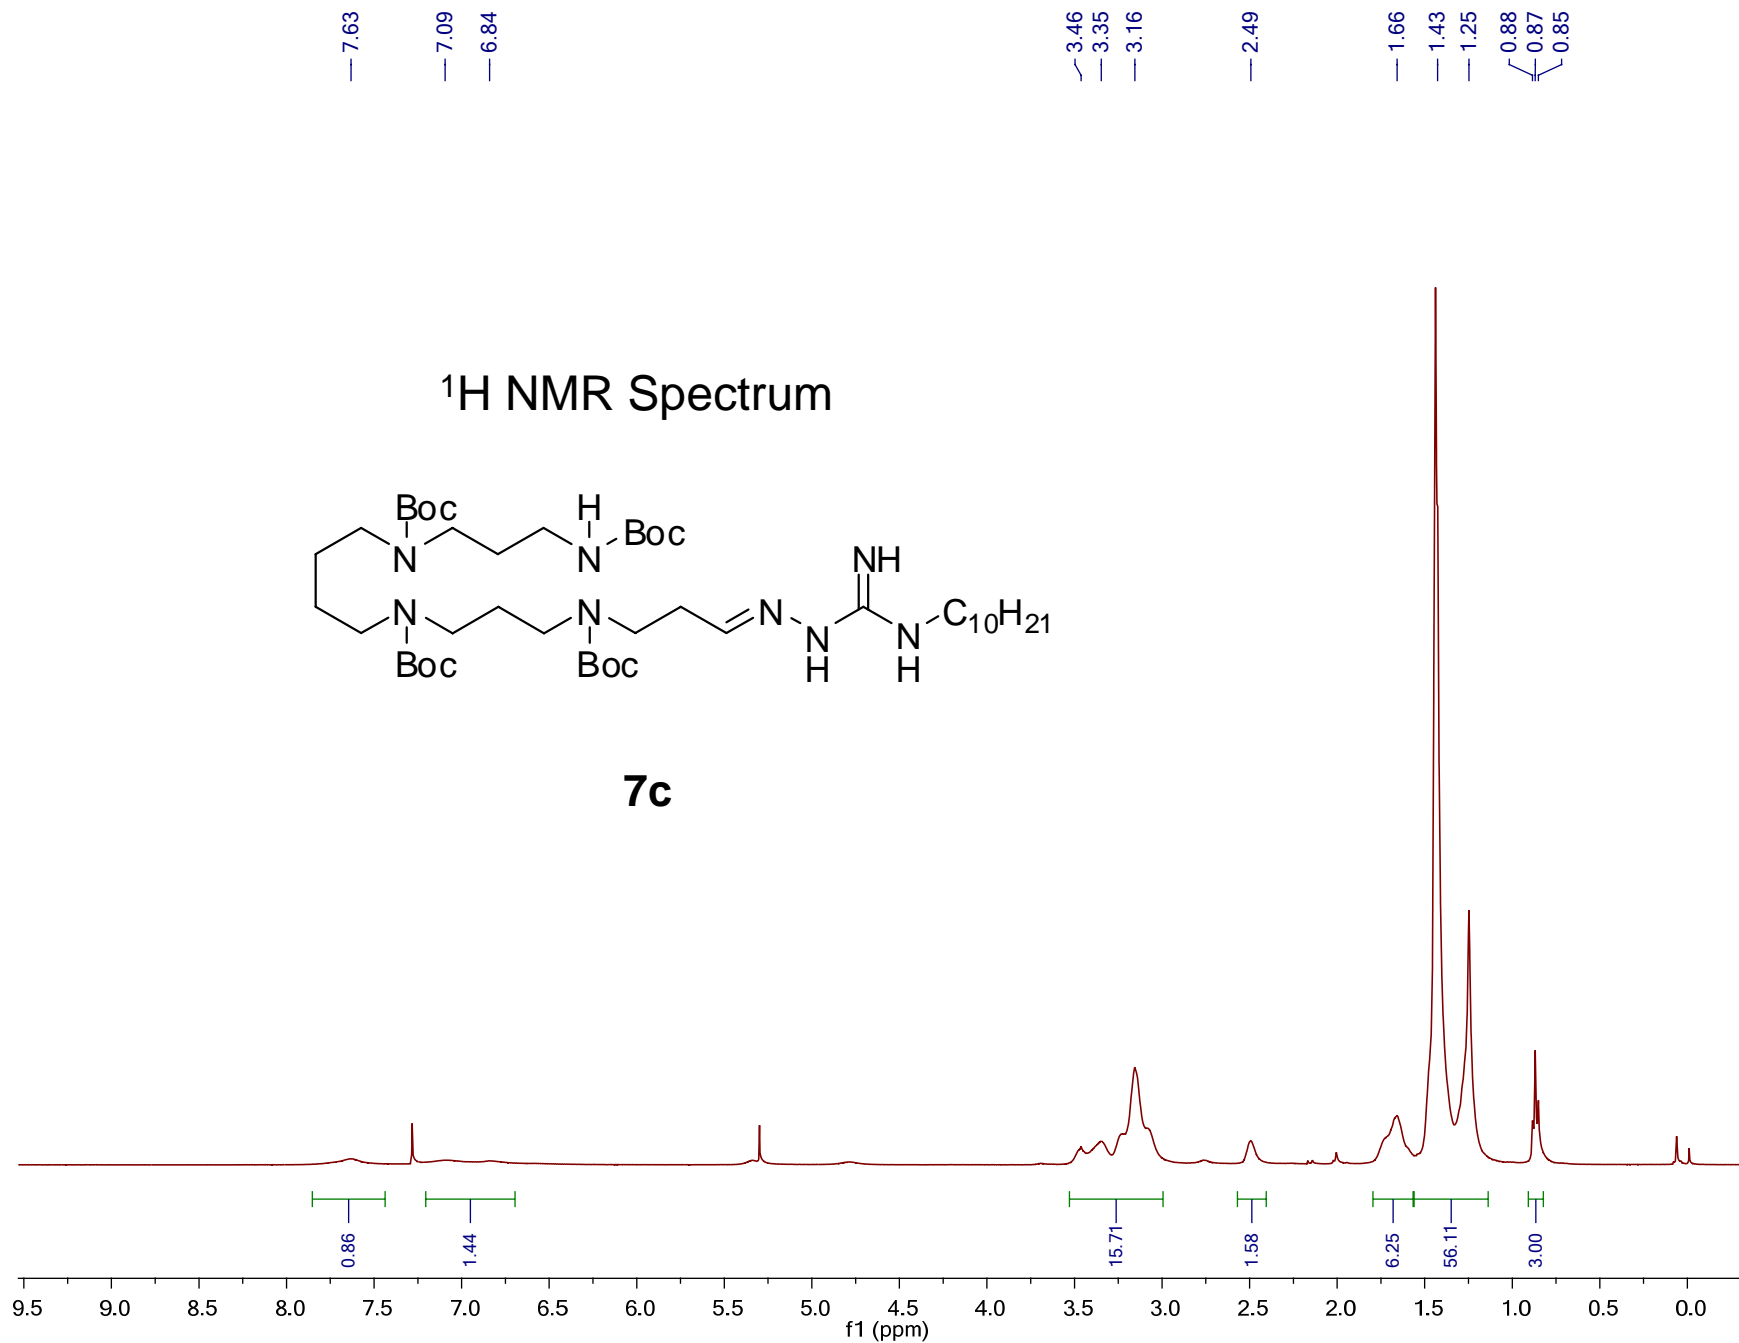

155.25  
155.21  
155.13  
154.57  
154.51

78.96  
78.92  
78.85  
78.83  
78.52

64.84

52.45

45.83

45.46

43.89

43.26

41.17

36.69

36.42

36.40

30.84

27.43

24.57

21.64

14.25

13.10

### <sup>13</sup>C NMR Spectrum

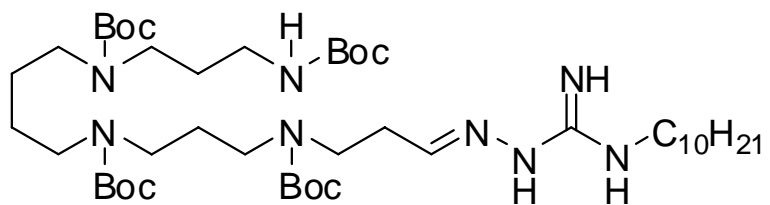

**7c**

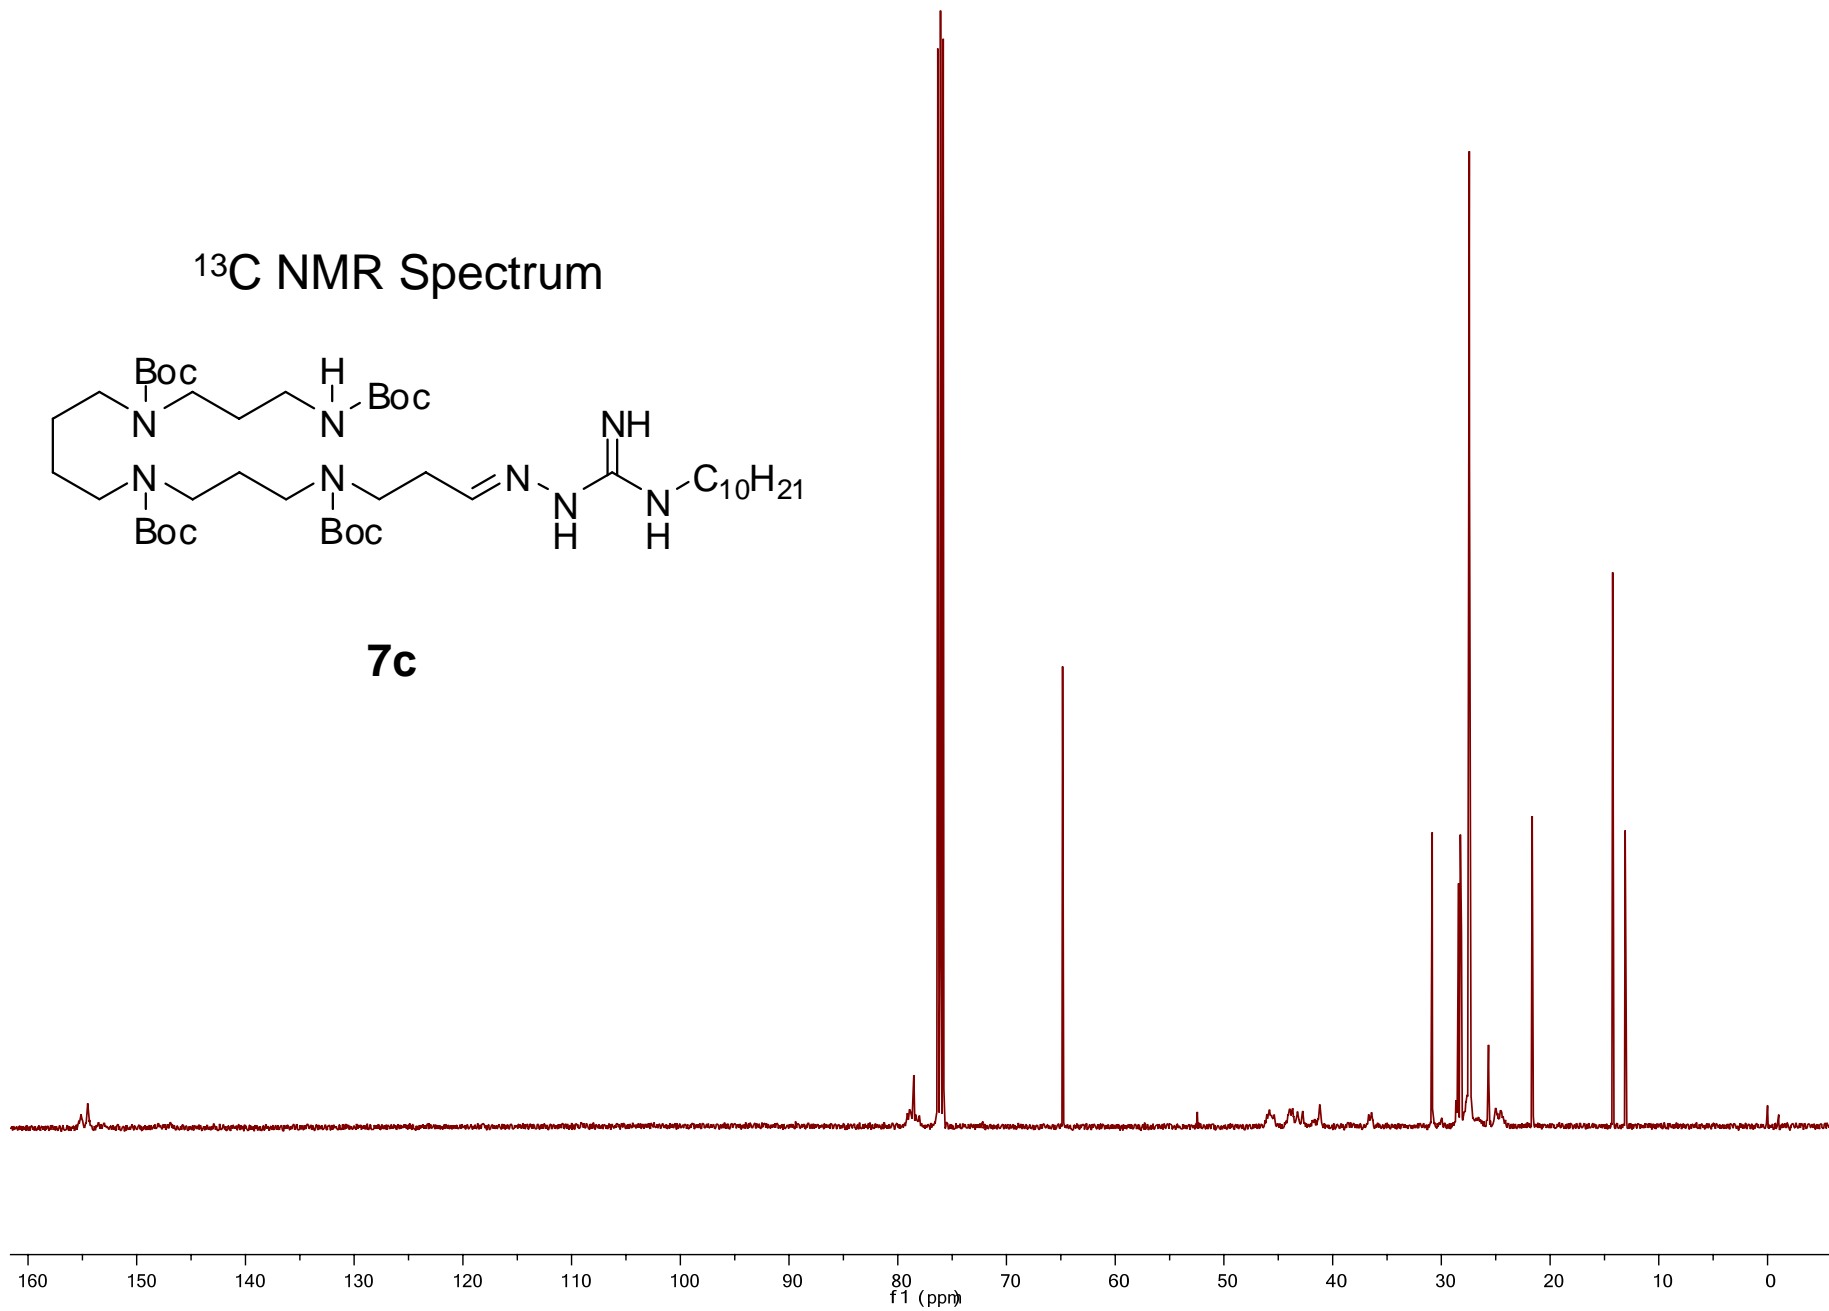

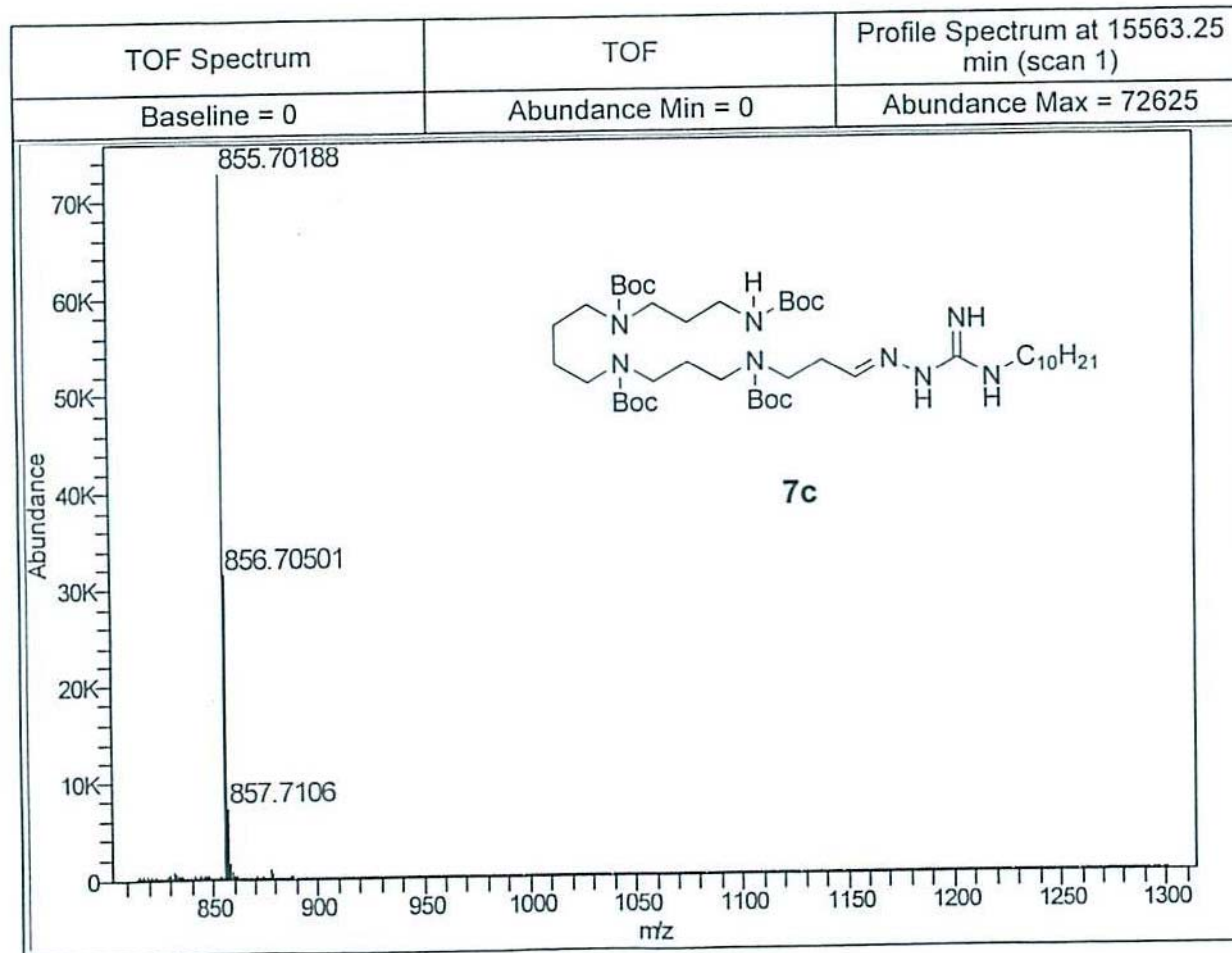

# <sup>1</sup>H NMR Spectrum

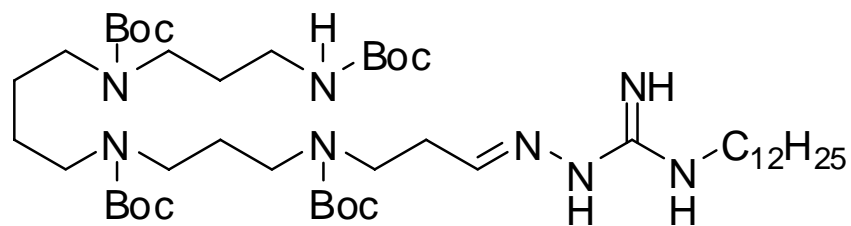

**7d**

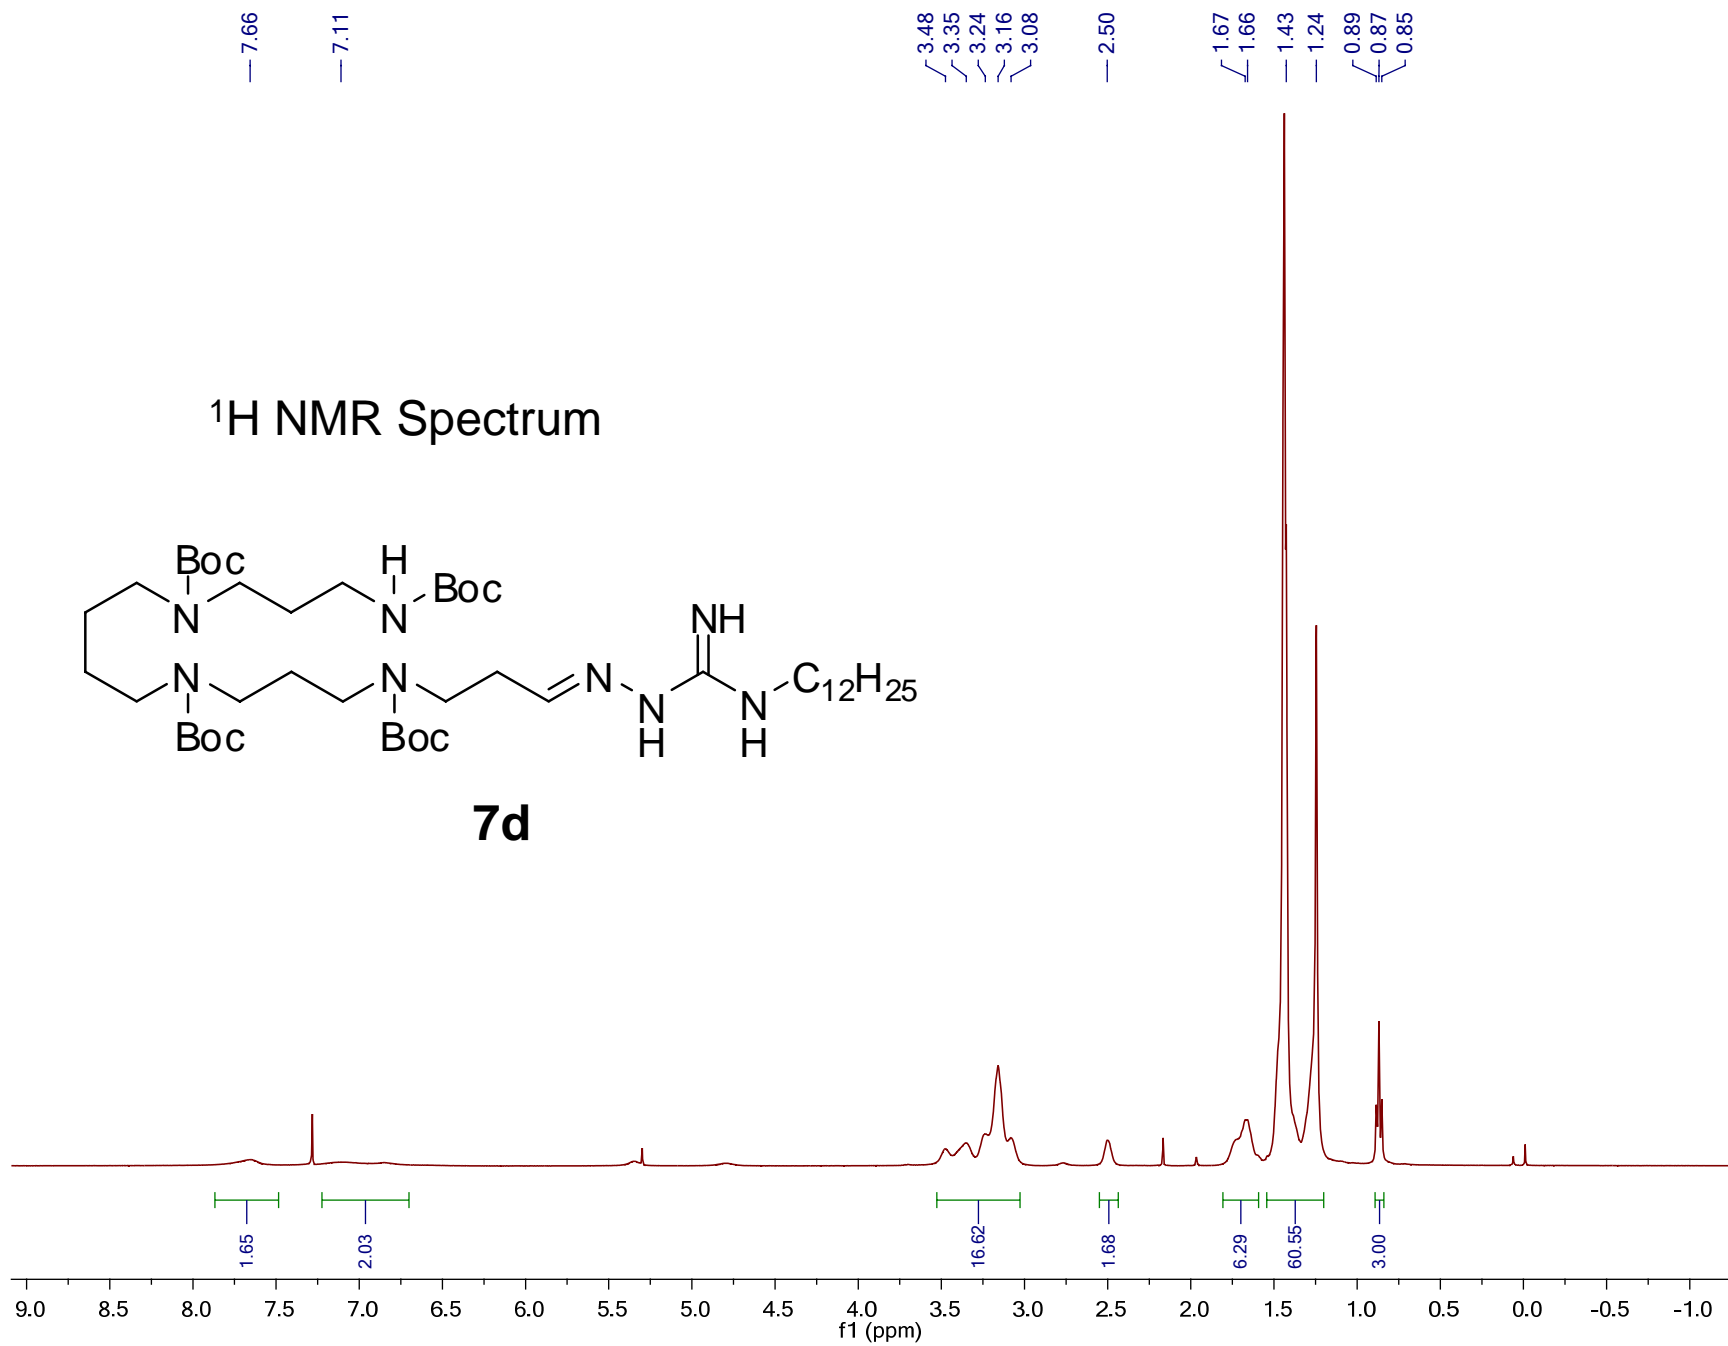

156.24  
156.11  
156.06  
155.50  
155.31  
155.27

80.15  
80.11  
80.00  
79.89  
79.54  
79.37  
79.06  
79.02

65.86

45.00  
44.96  
44.91  
44.83  
44.69  
44.26  
43.79  
42.23

37.69  
37.53  
37.42  
29.59  
29.34  
28.69  
28.51  
26.69  
22.68

15.27  
14.13

# <sup>13</sup>C NMR Spectrum

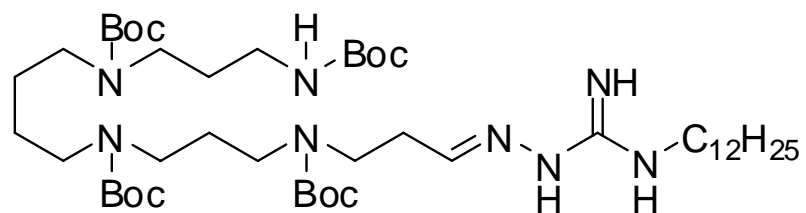

**7d**

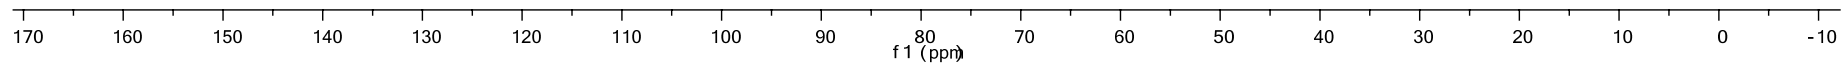



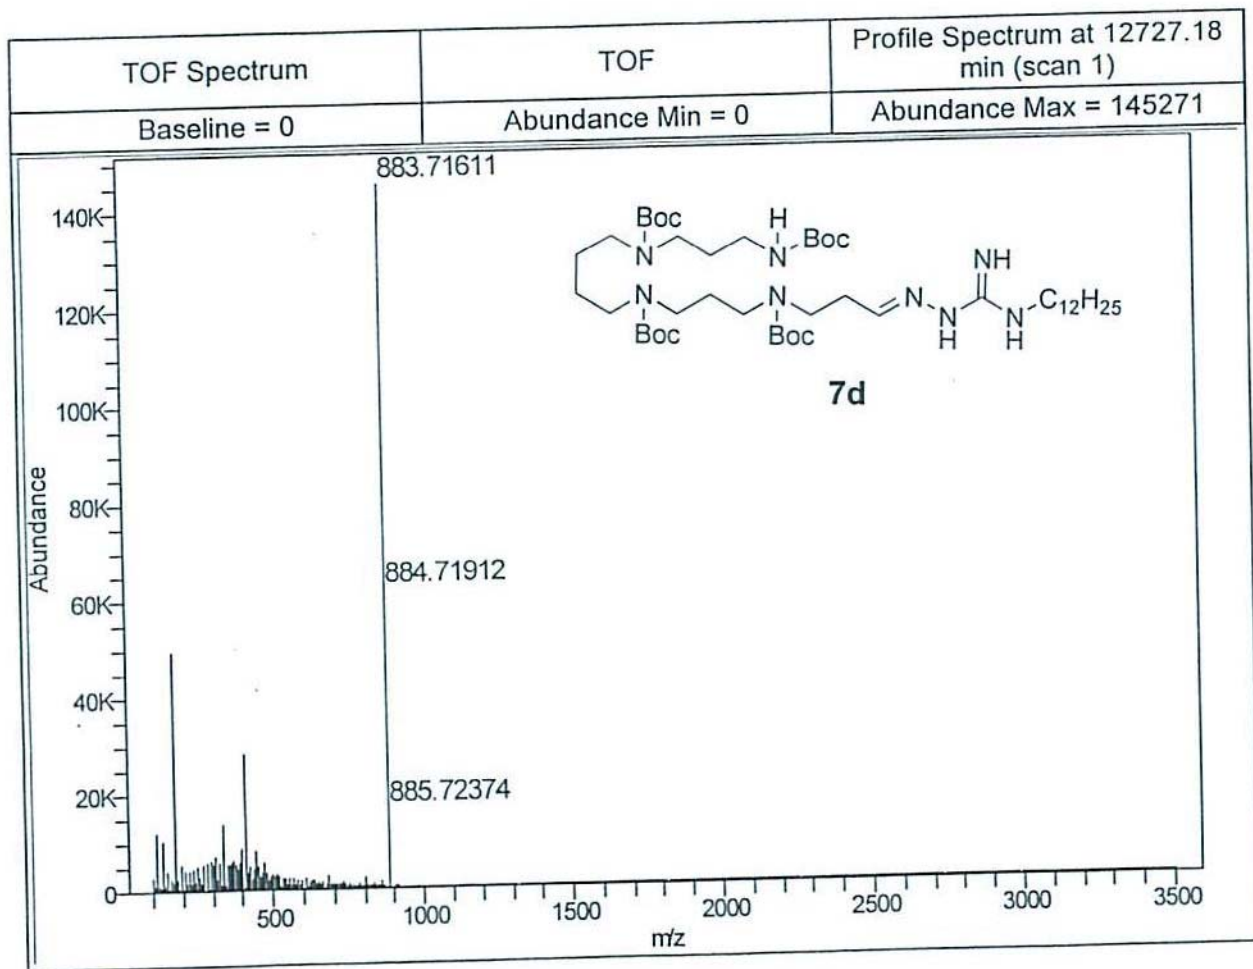

# <sup>1</sup>H NMR Spectrum

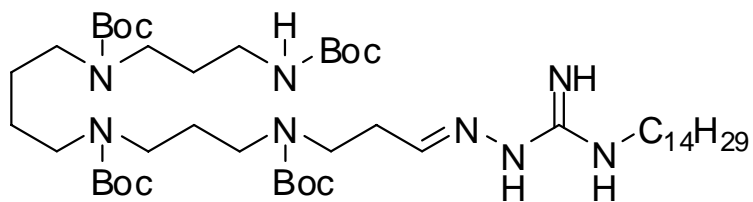

**7e**

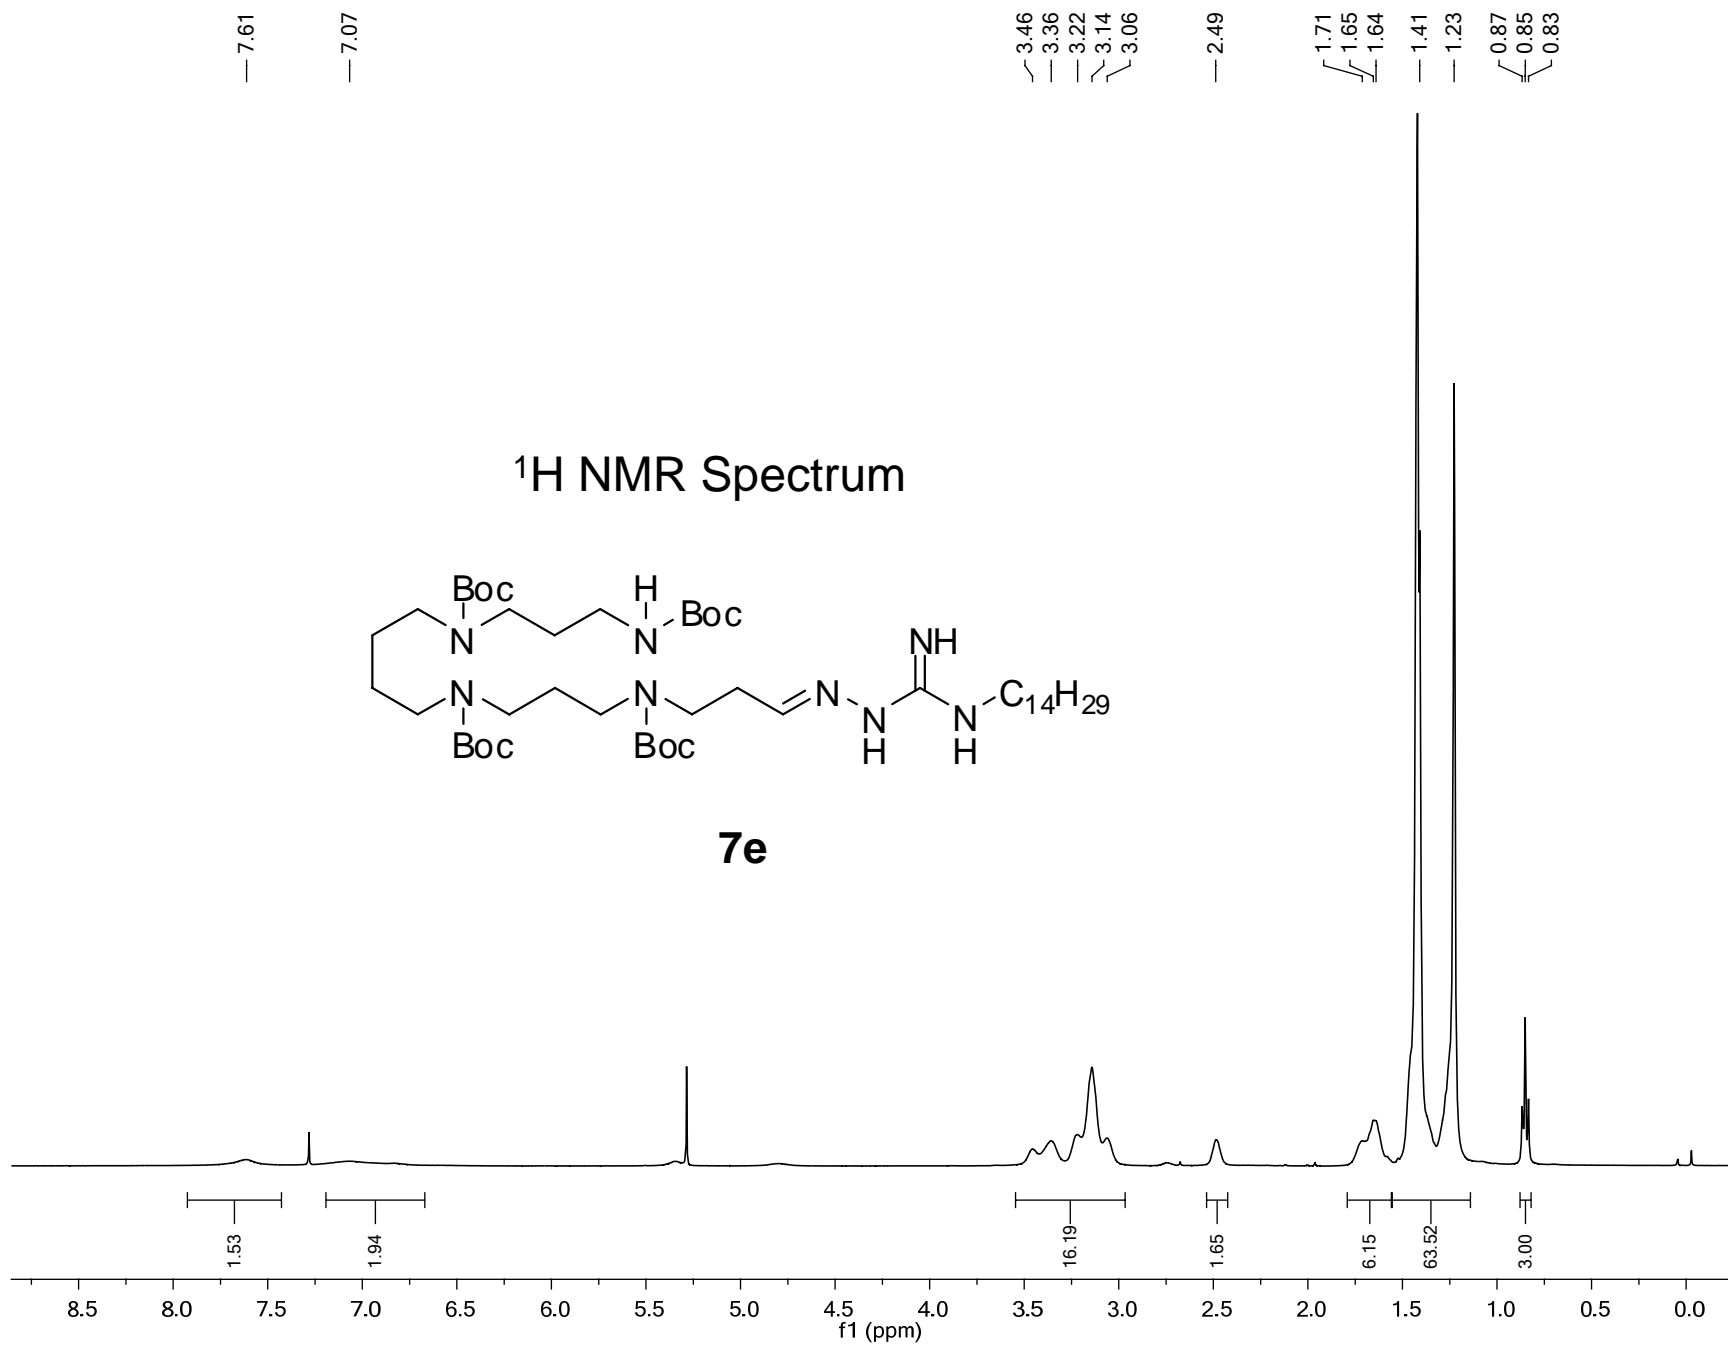

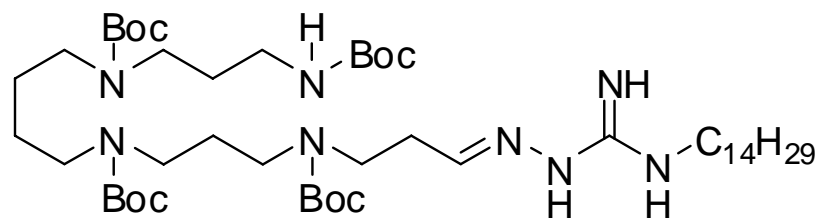

**7e**

<sup>13</sup>C NMR Spectrum

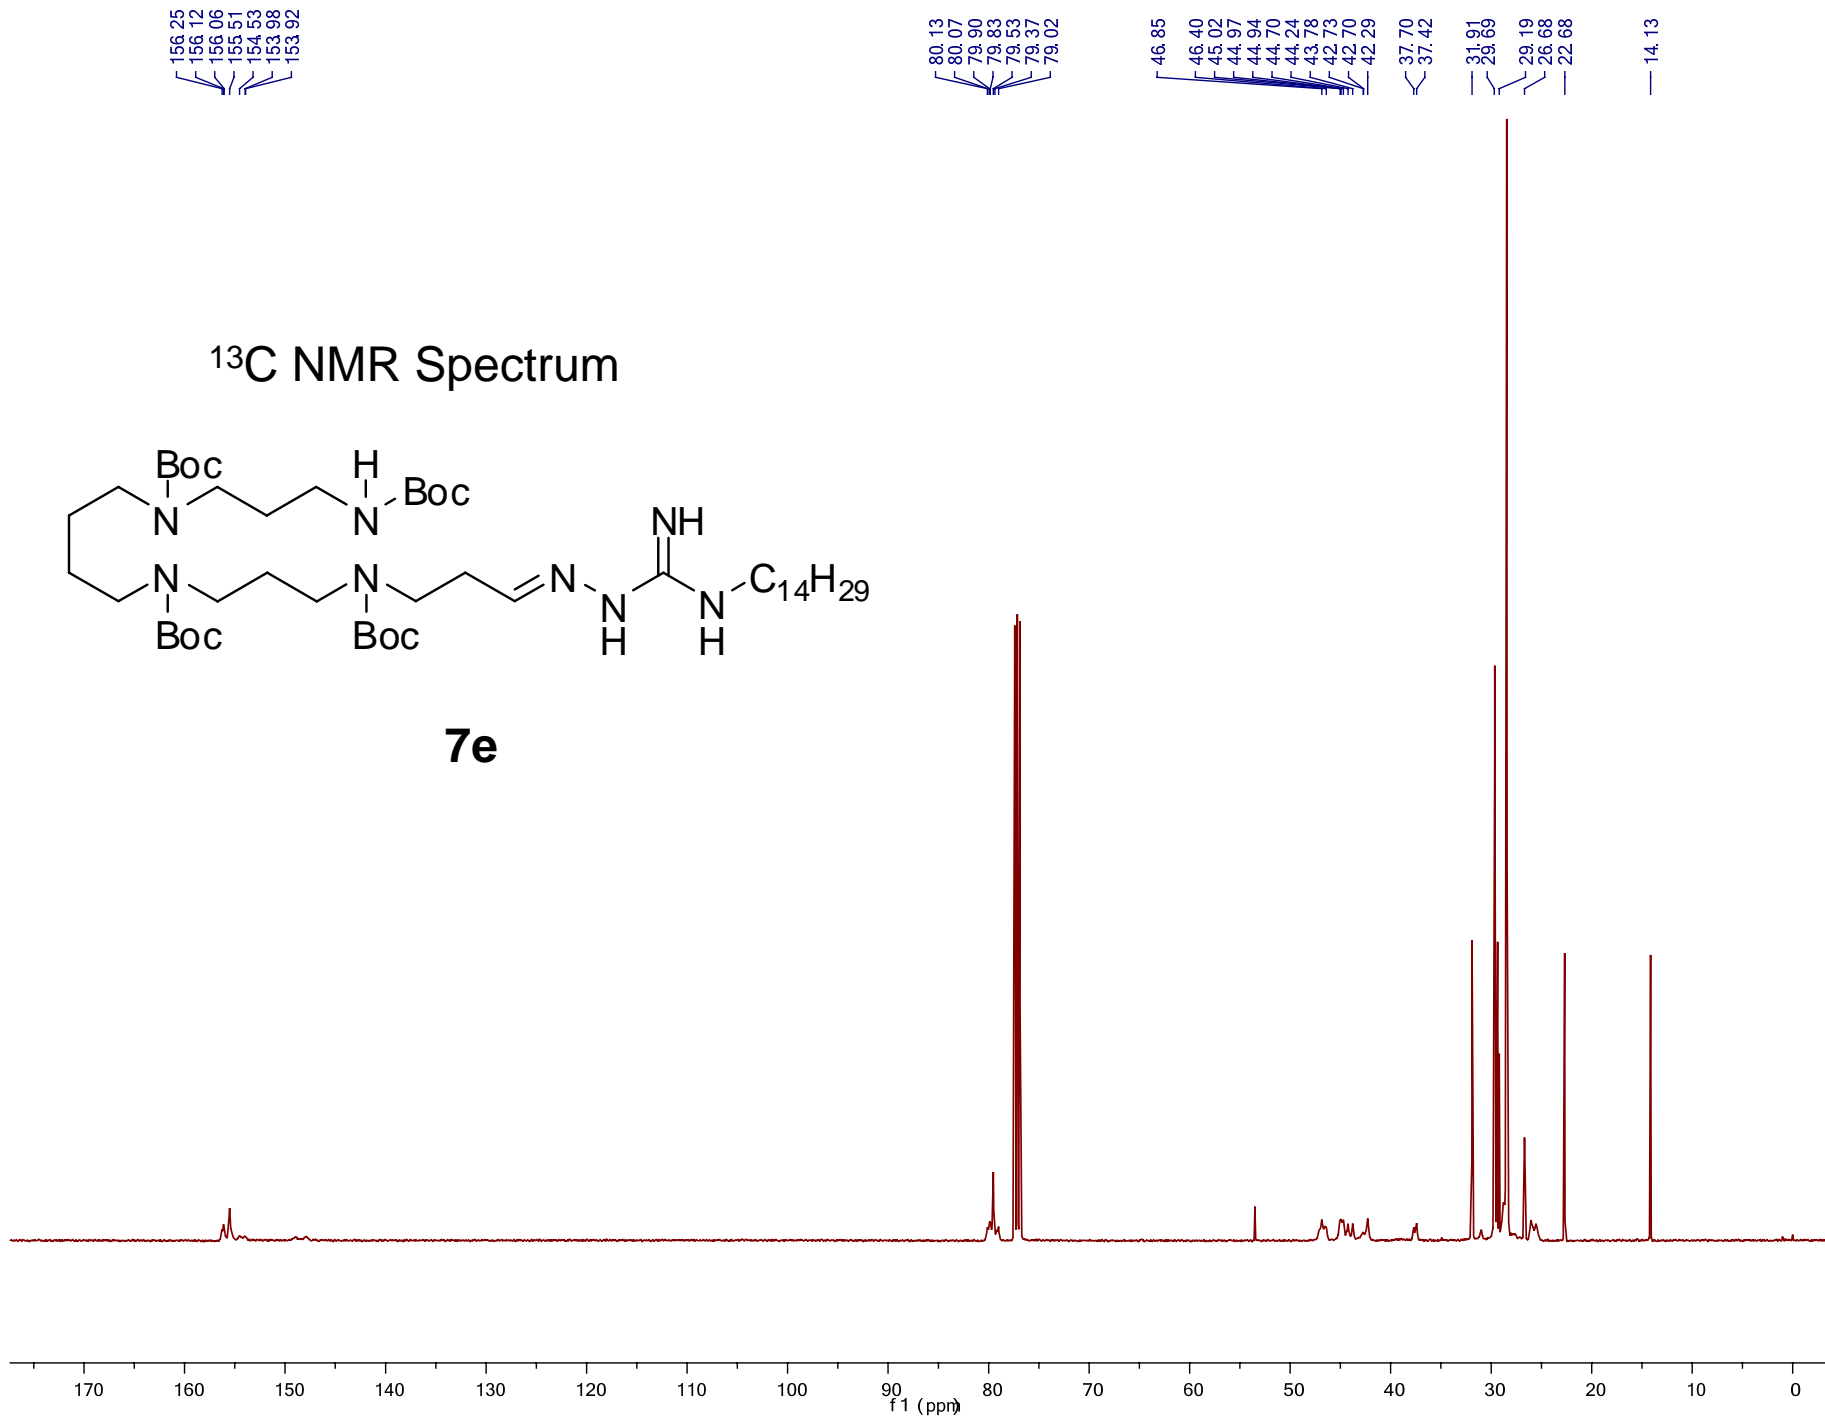

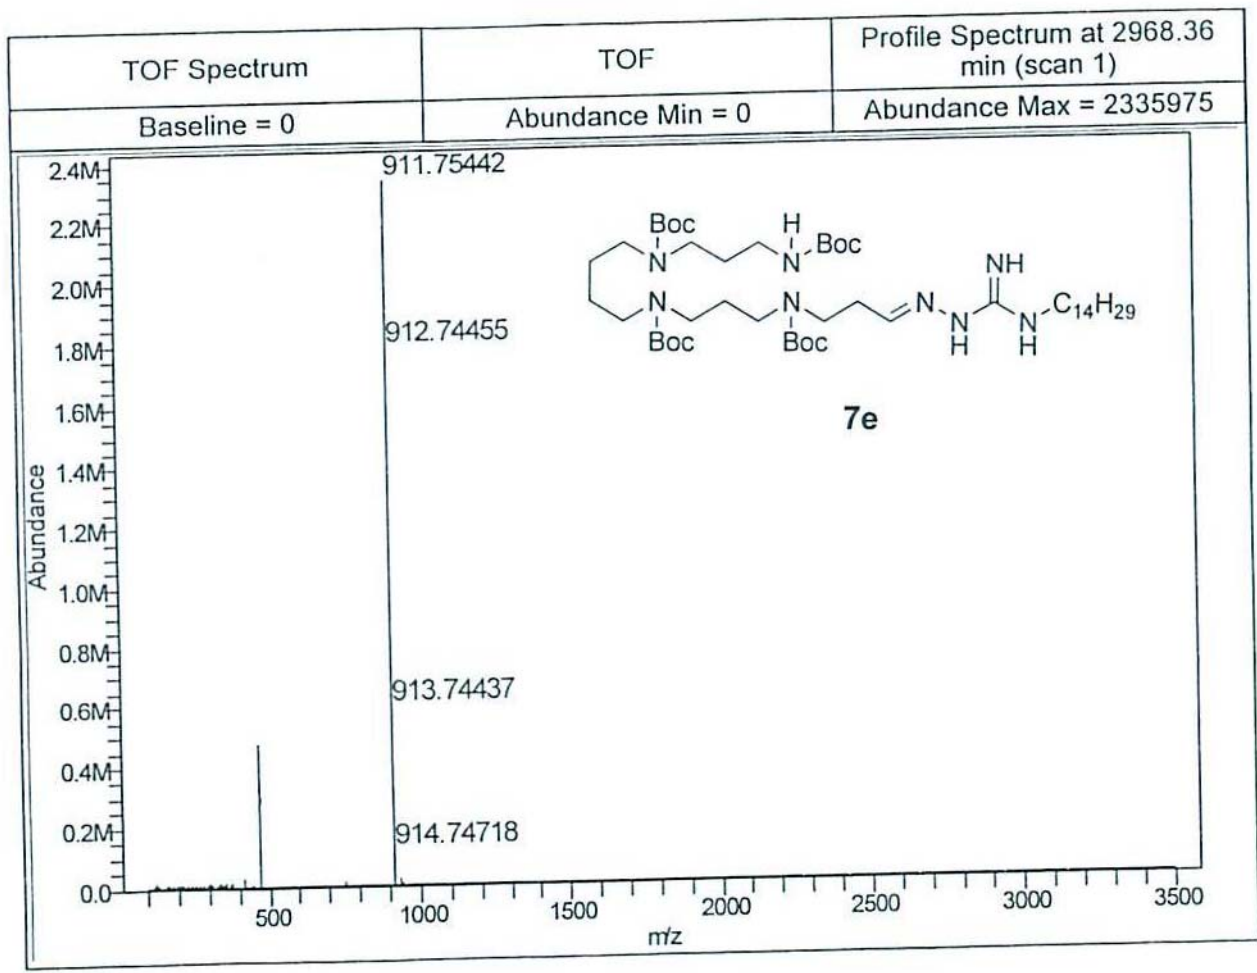

# <sup>1</sup>H NMR Spectrum

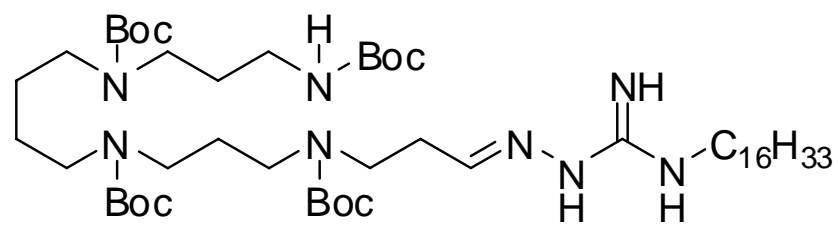

**7f**

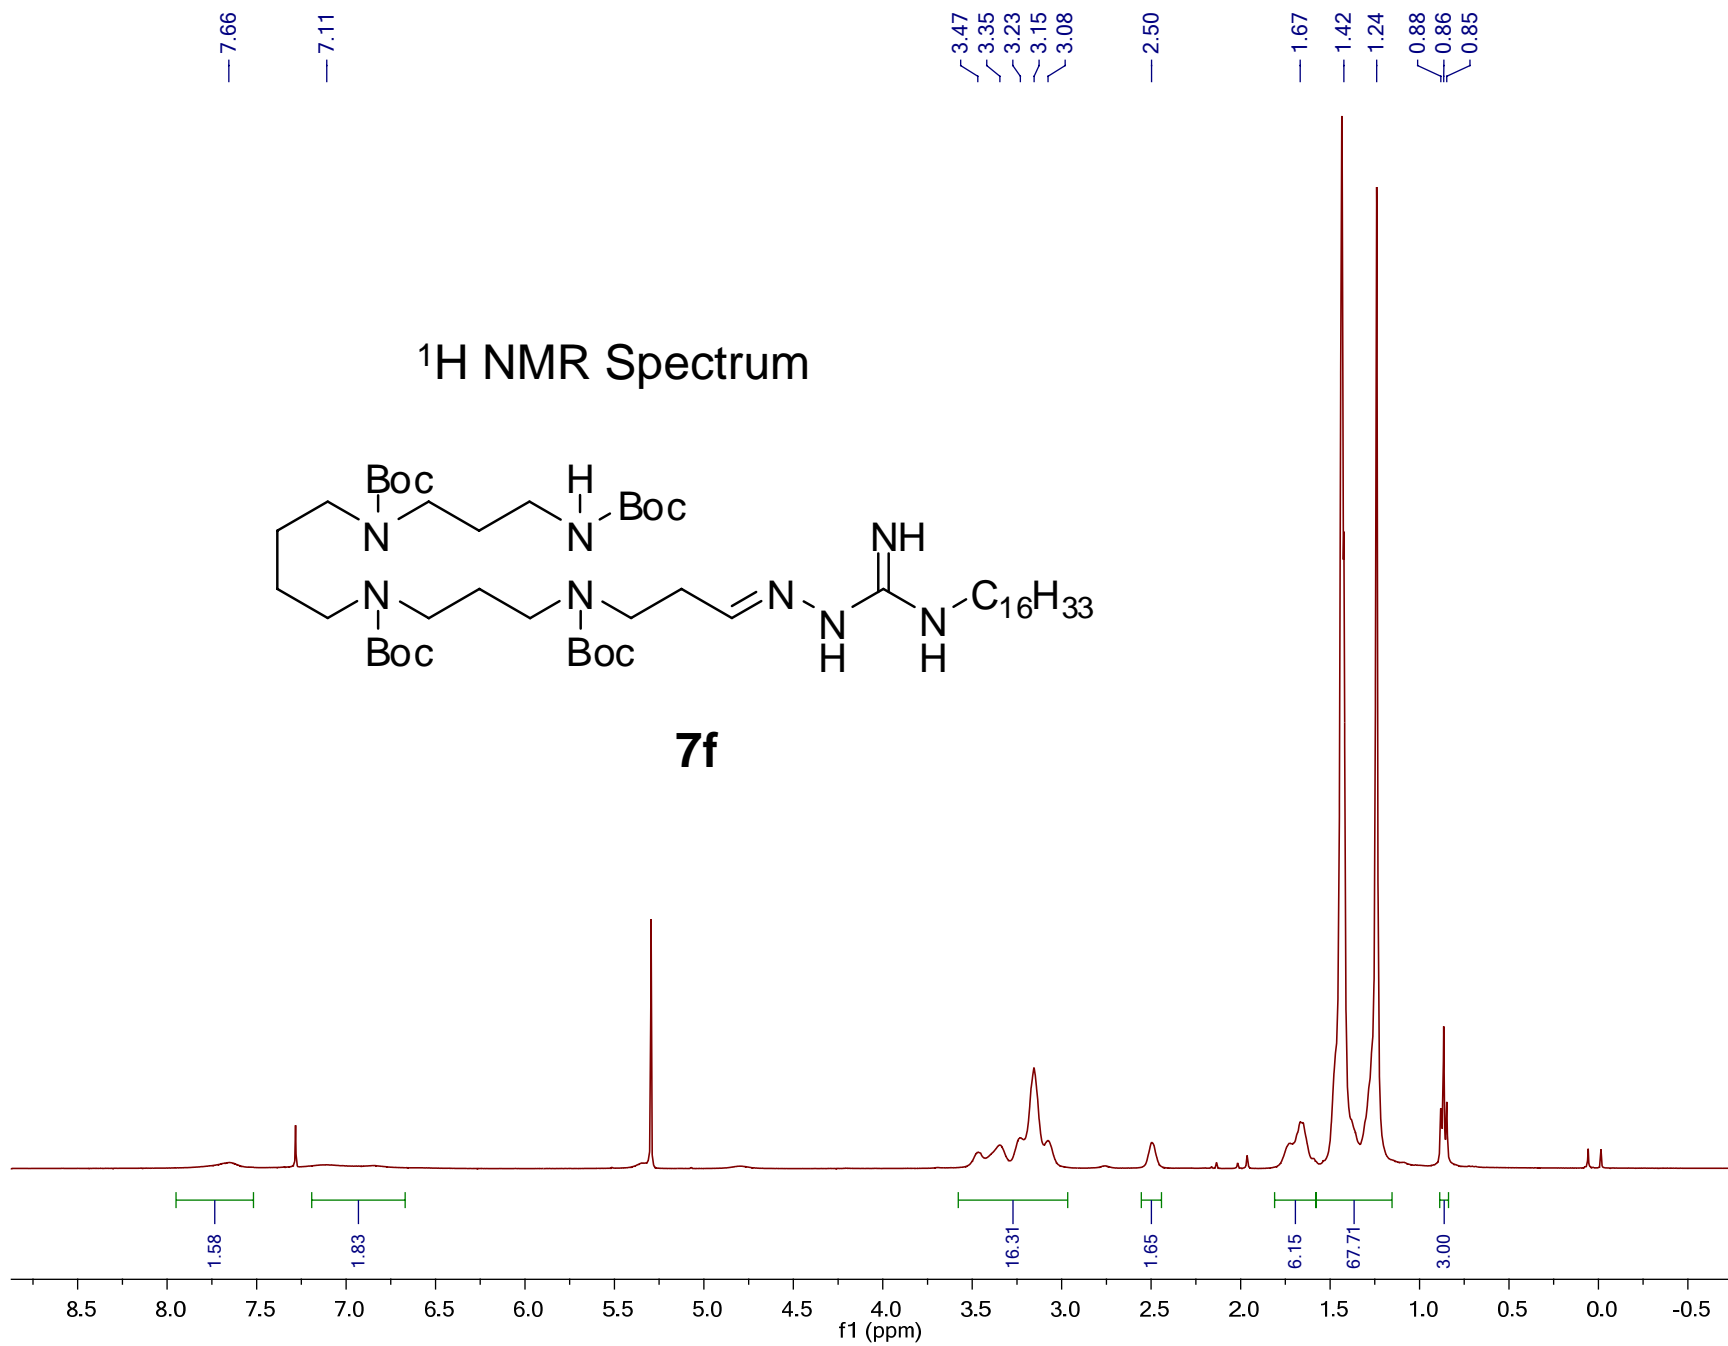

155.25  
155.10  
154.52

148.09  
147.00

79.12  
78.83  
78.52  
78.36  
78.03

52.46  
45.83  
43.90  
43.69  
43.22  
42.75  
41.20  
36.69  
36.42

30.98  
25.68  
24.54  
21.66

13.11

### <sup>13</sup>C NMR Spectrum

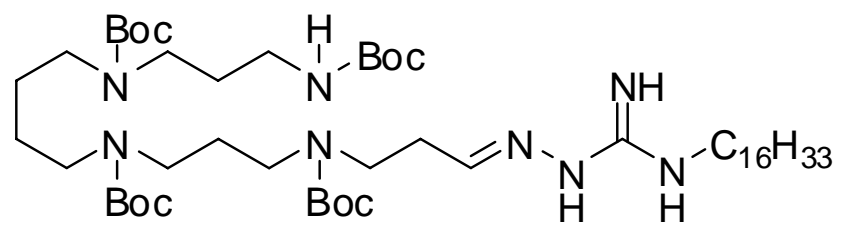

**7f**

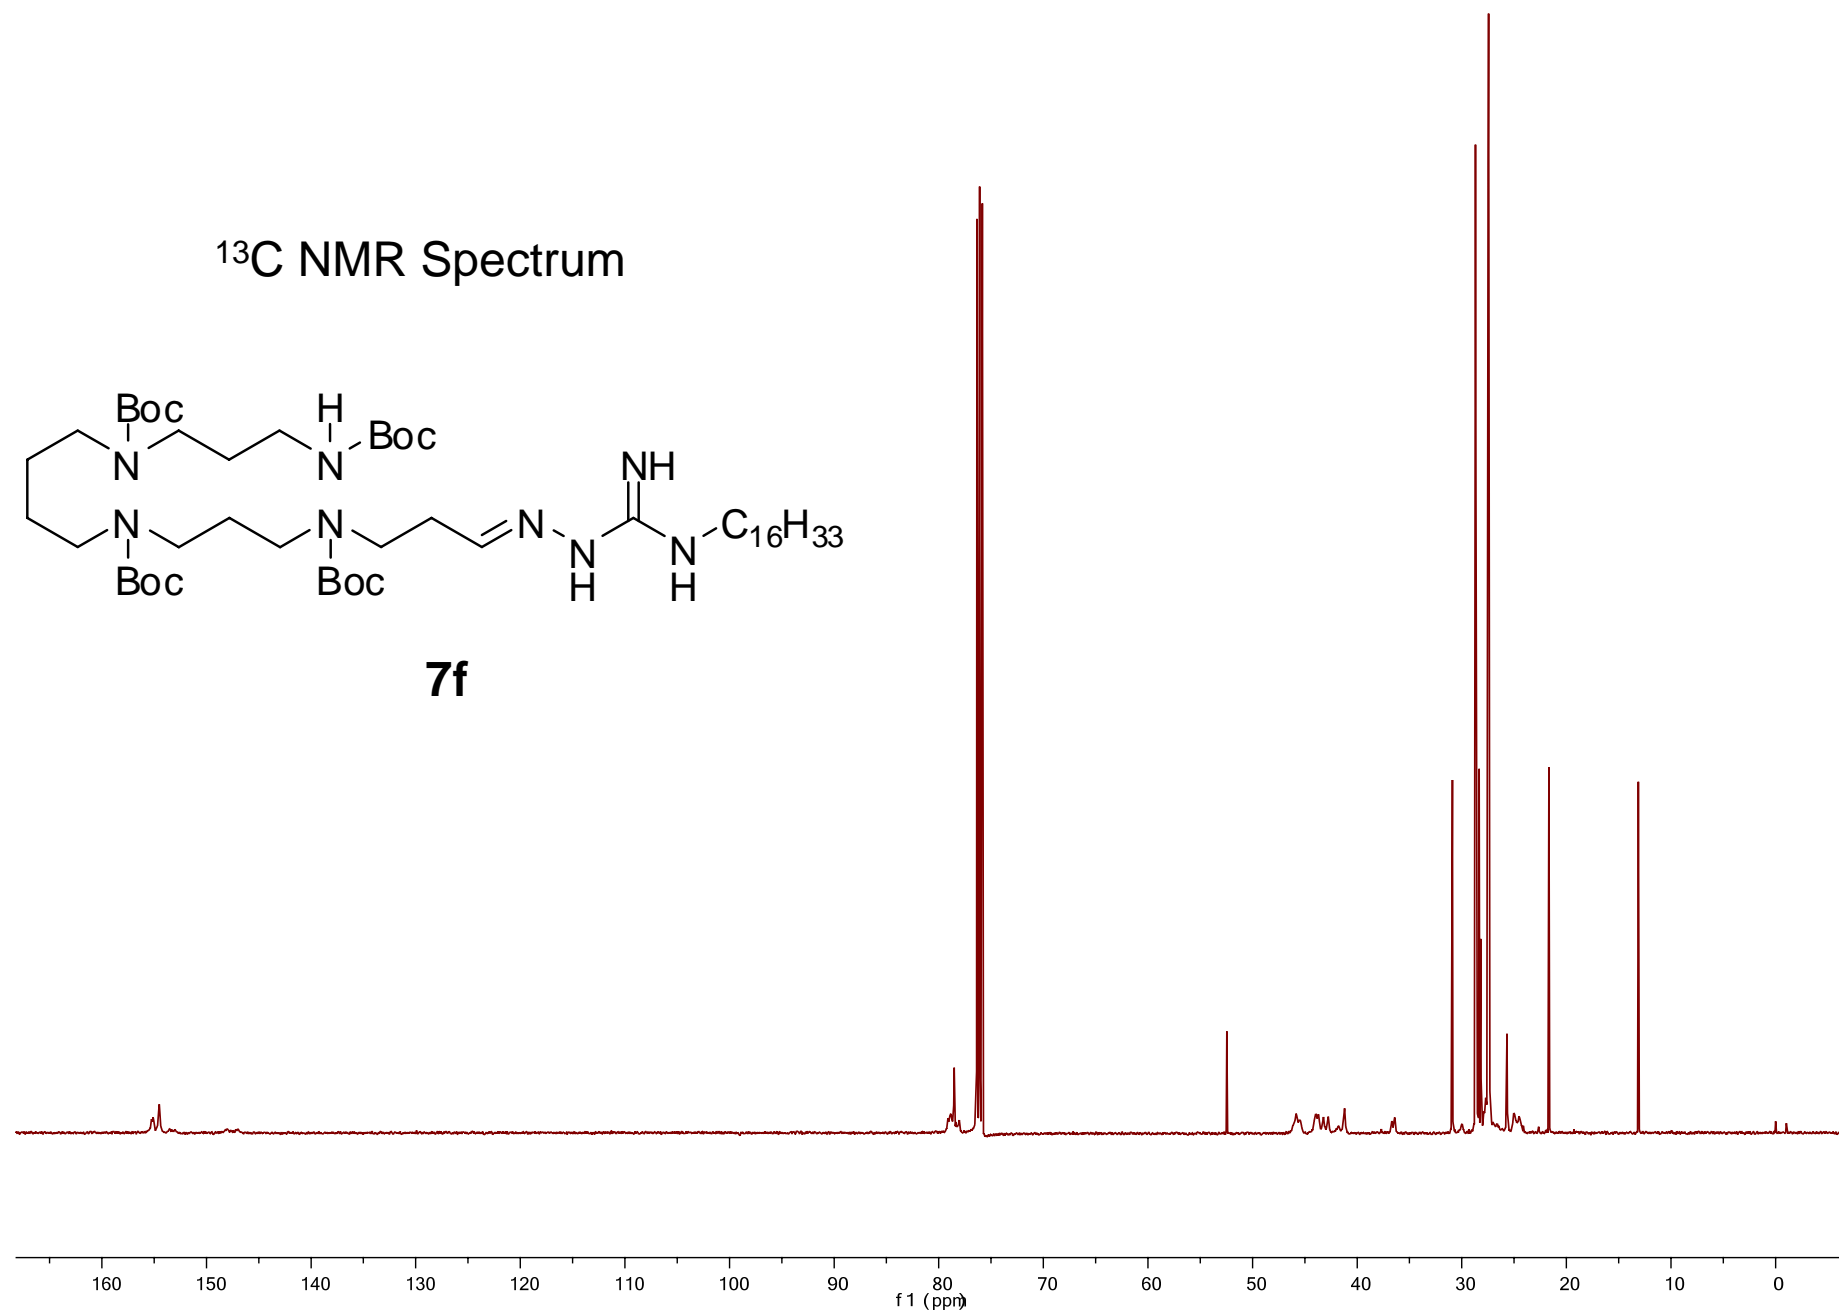

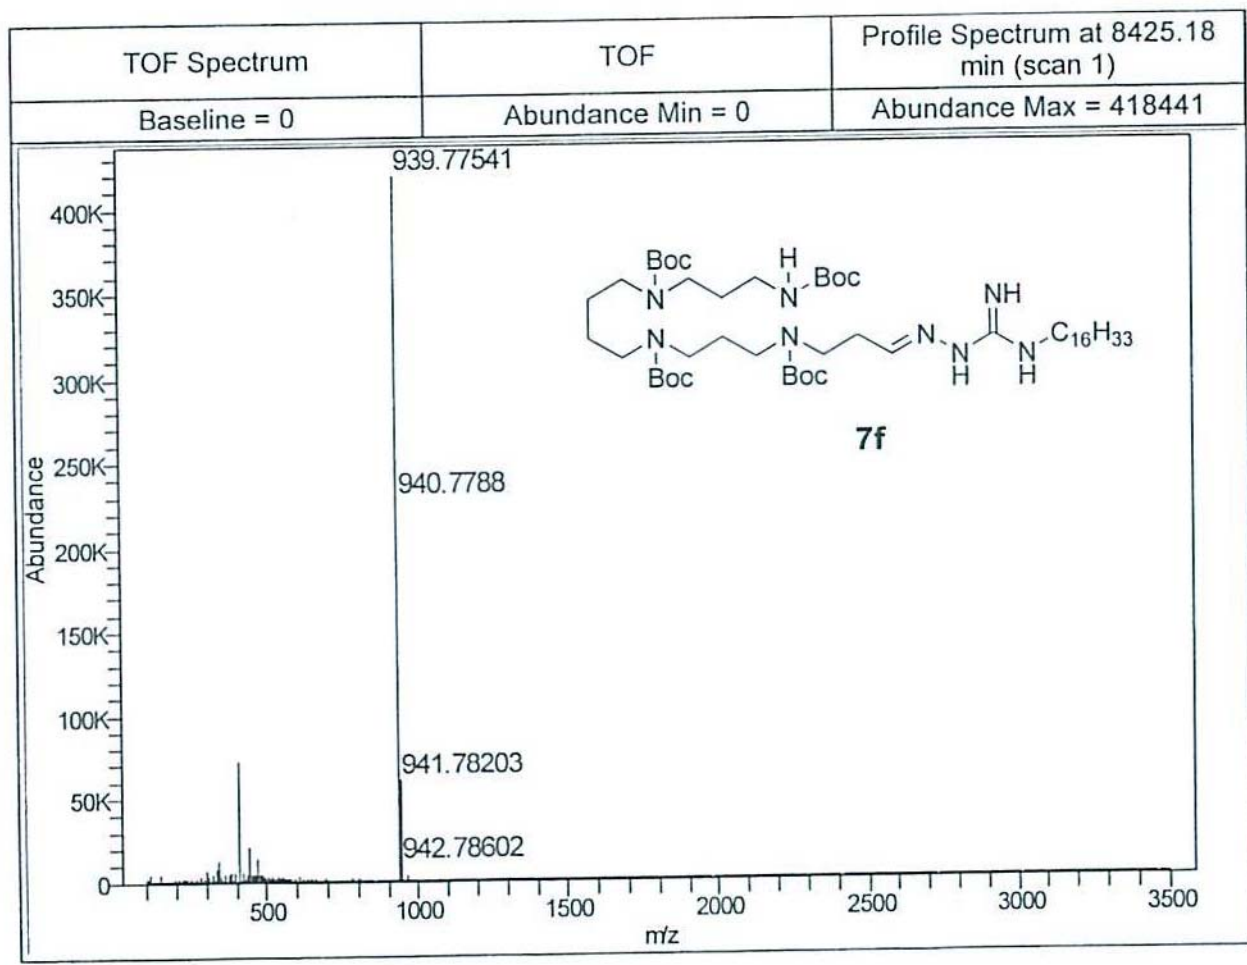

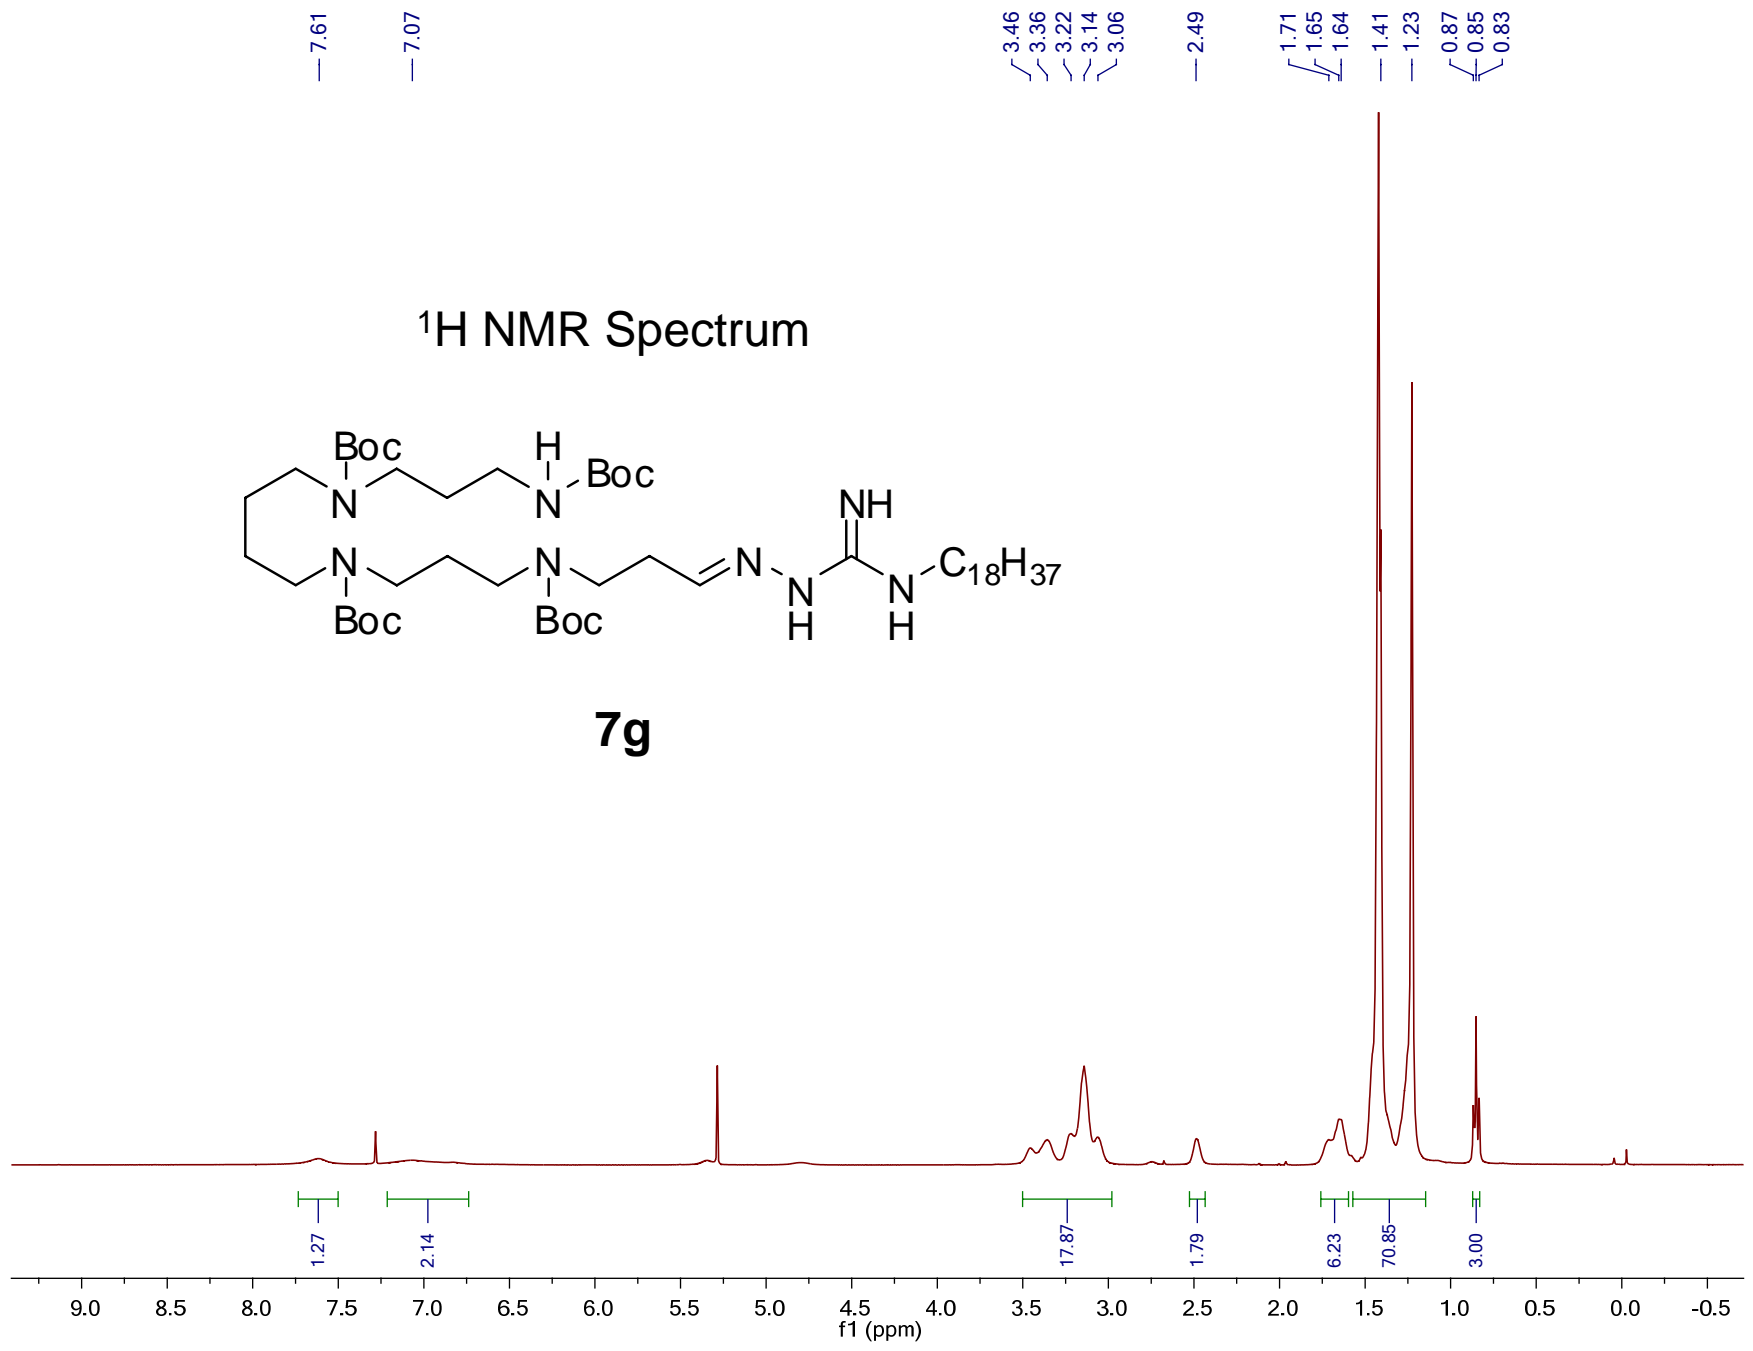



# <sup>13</sup>C NMR Spectrum

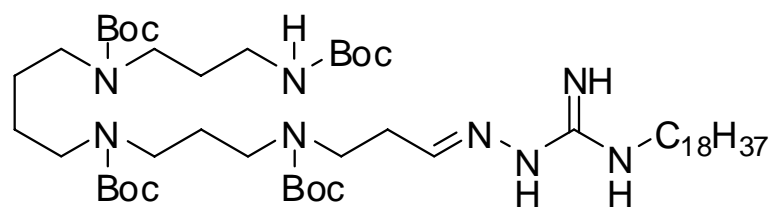

**7g**

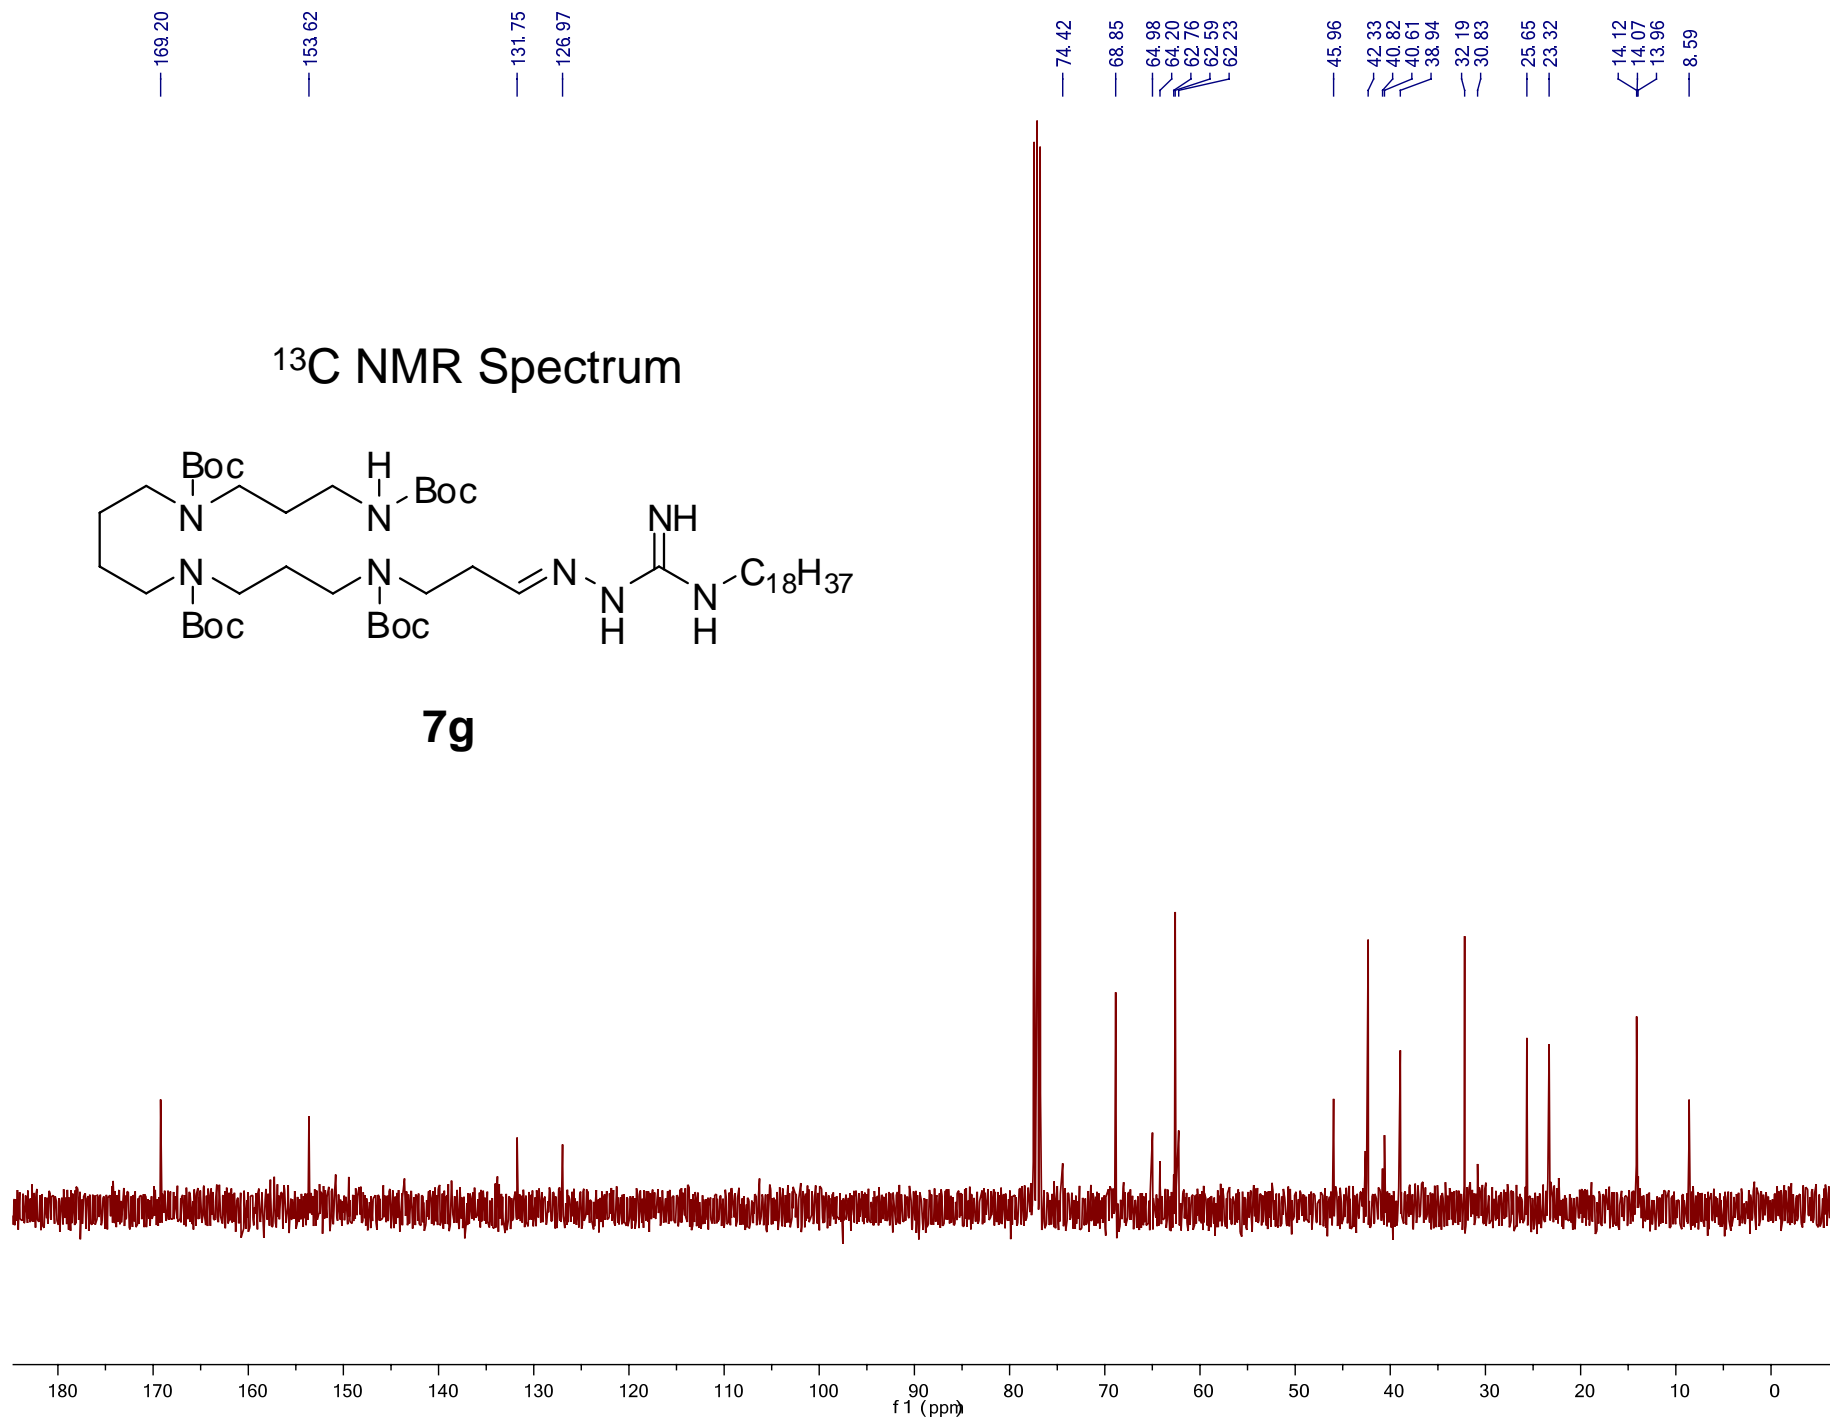

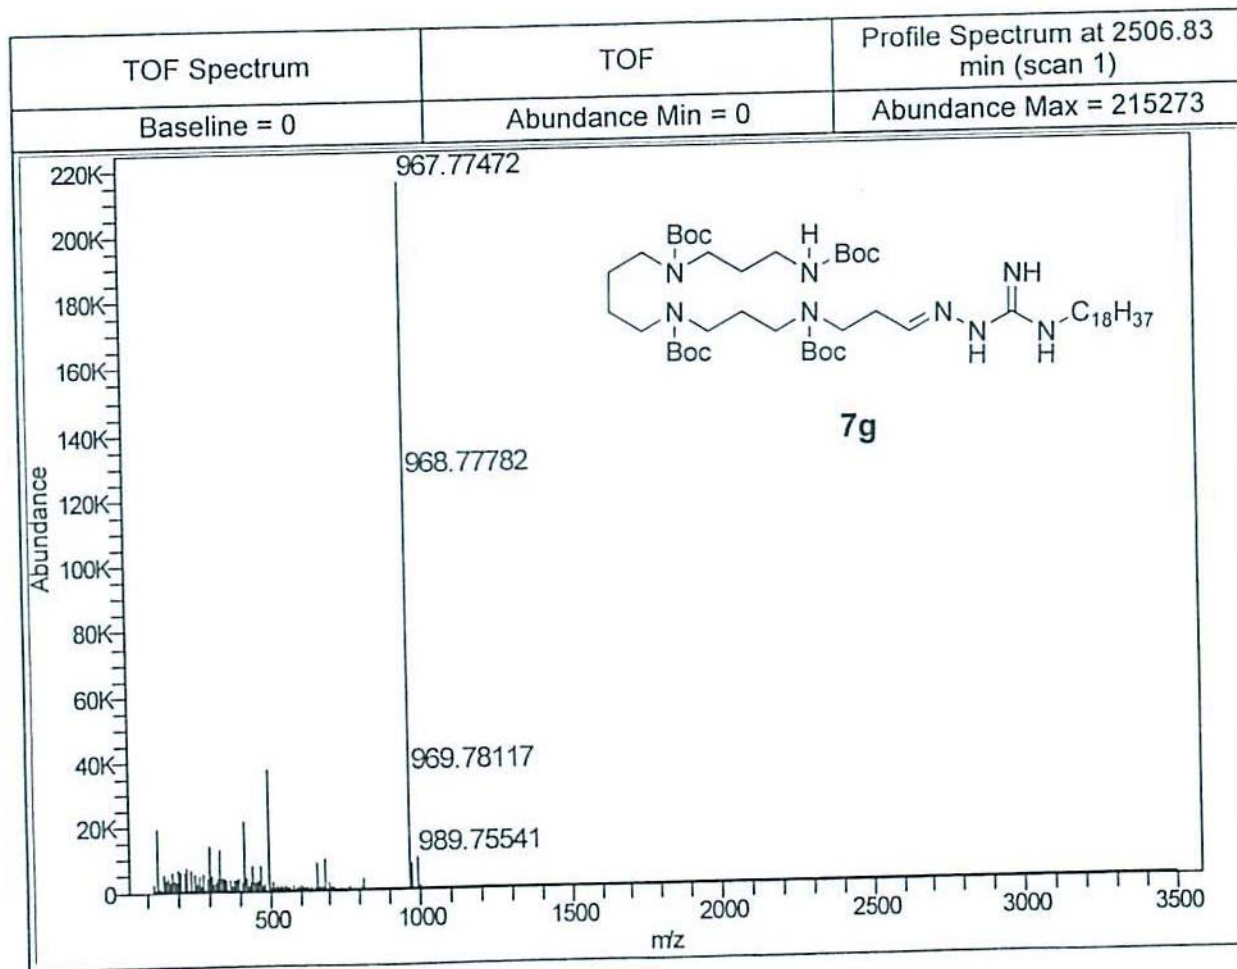

# <sup>1</sup>H NMR Spectrum

• 5 CF<sub>3</sub>COOH

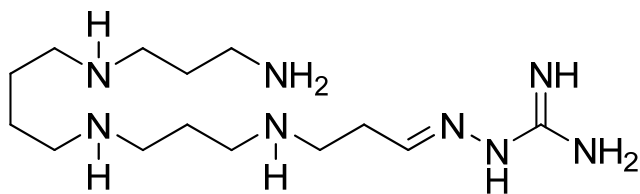

**8a**

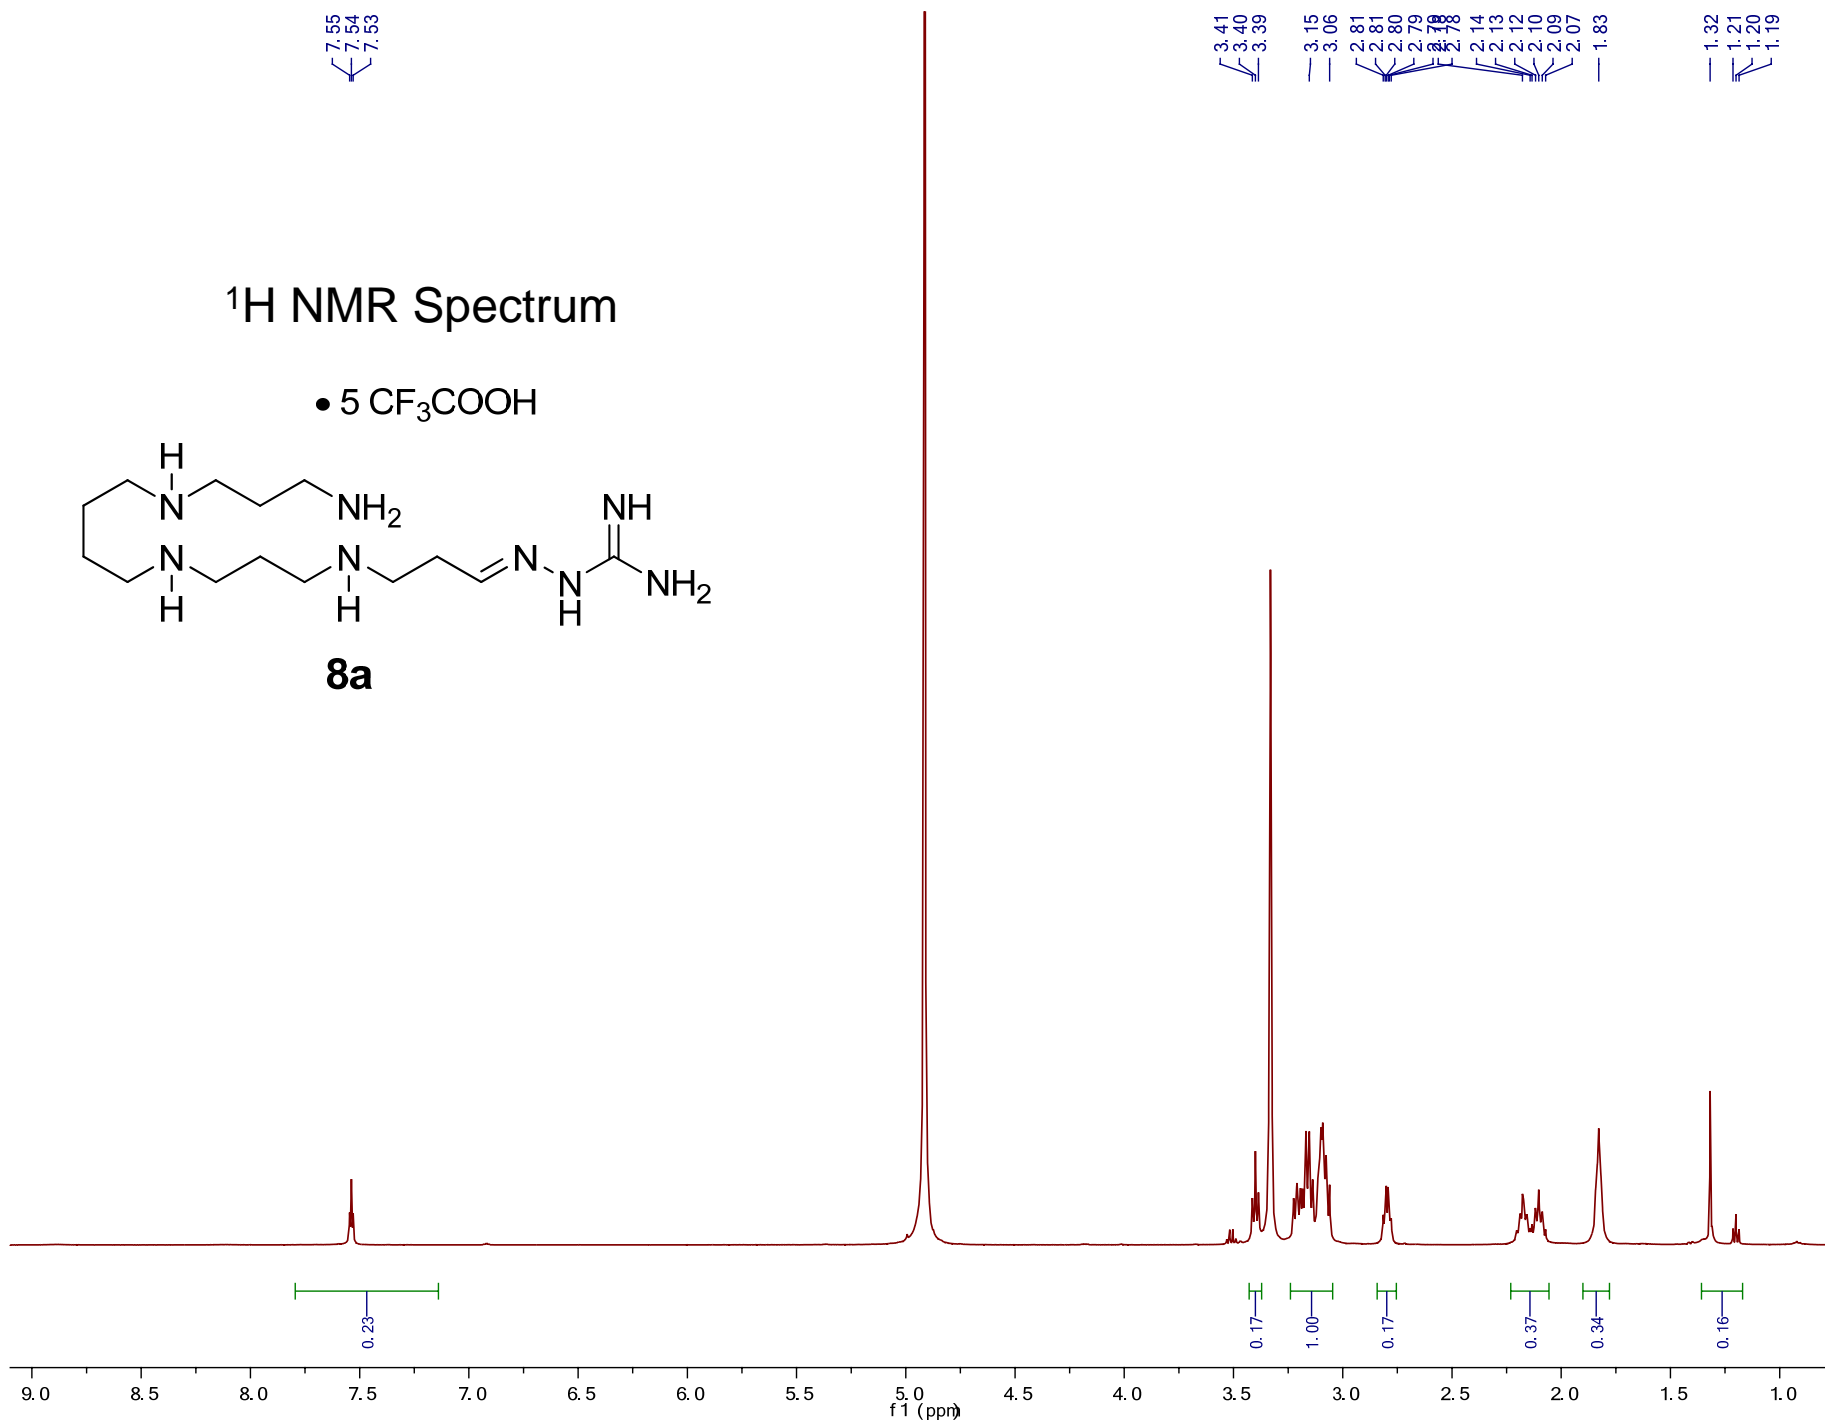

— 155.70

— 147.12

— 117.75

— 115.43

— 46.80

44.59

44.42

44.39

43.55

— 36.38

— 28.47

23.97

22.80

22.69

# <sup>13</sup>C NMR Spectrum

• 5 CF<sub>3</sub>COOH

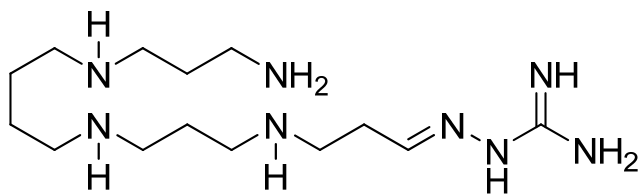

**8a**

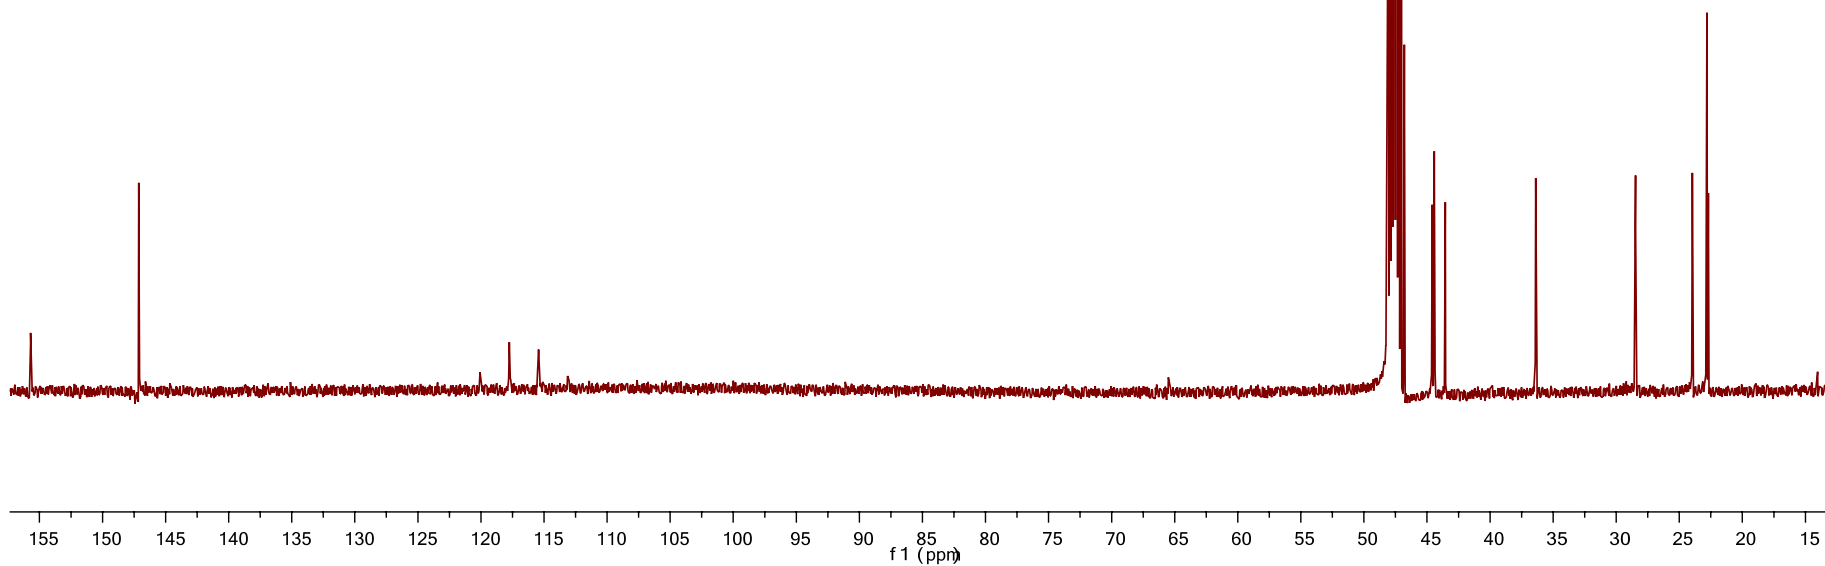

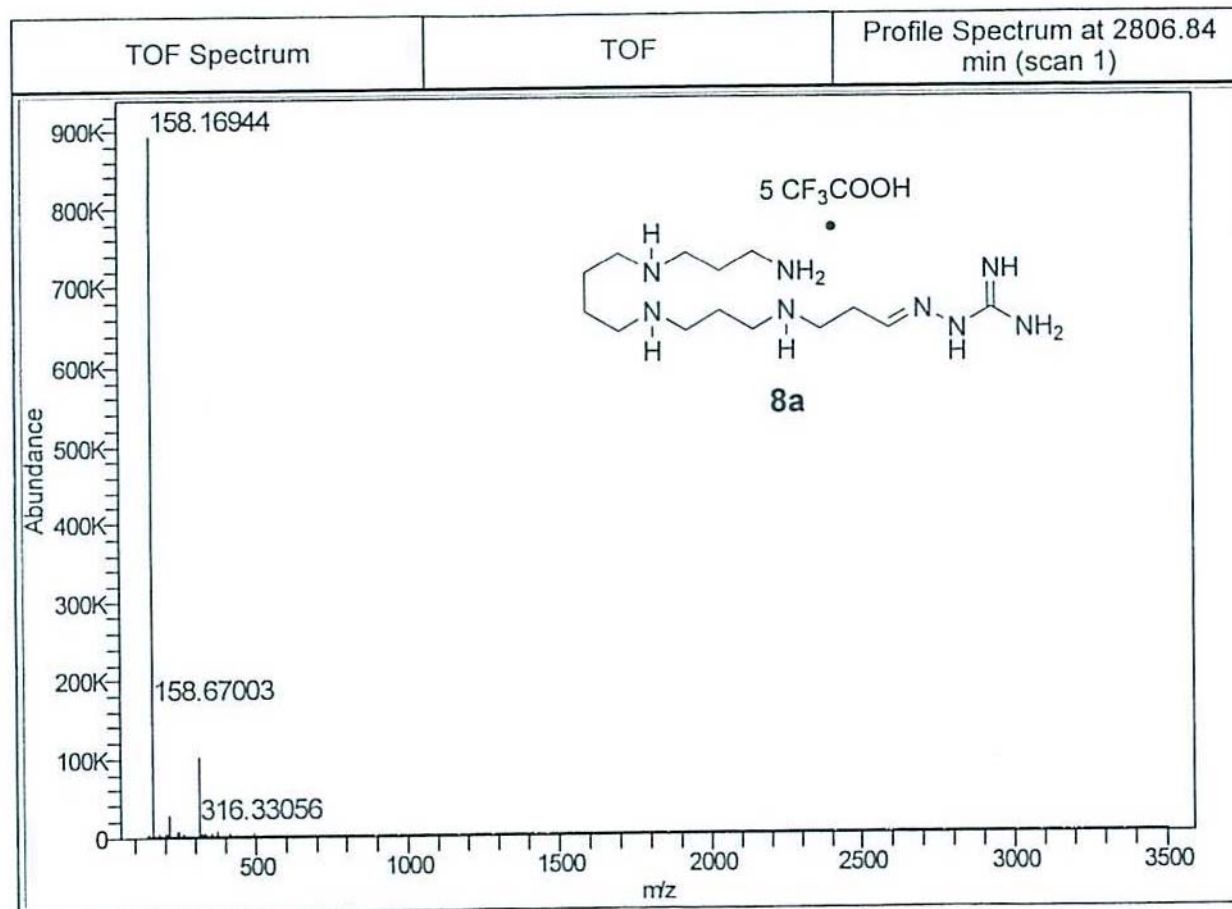

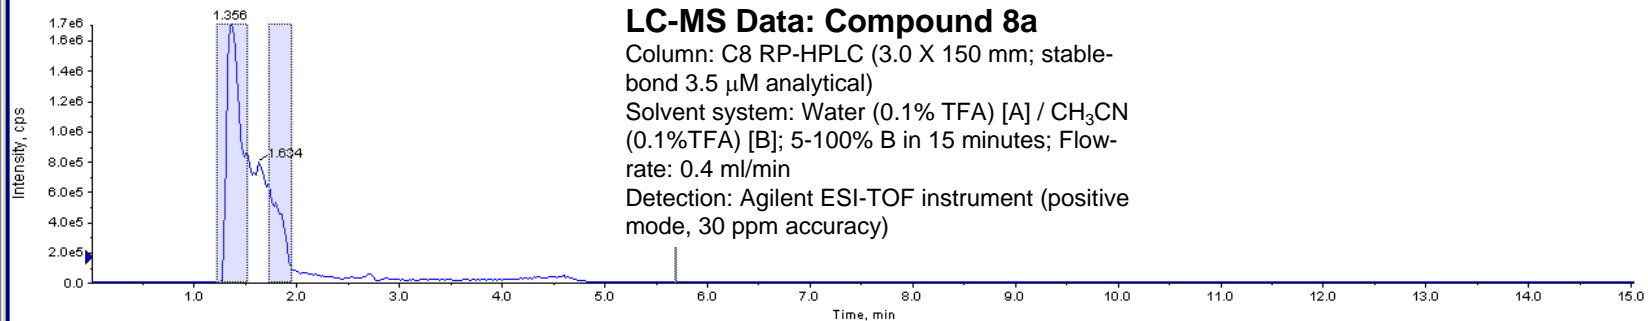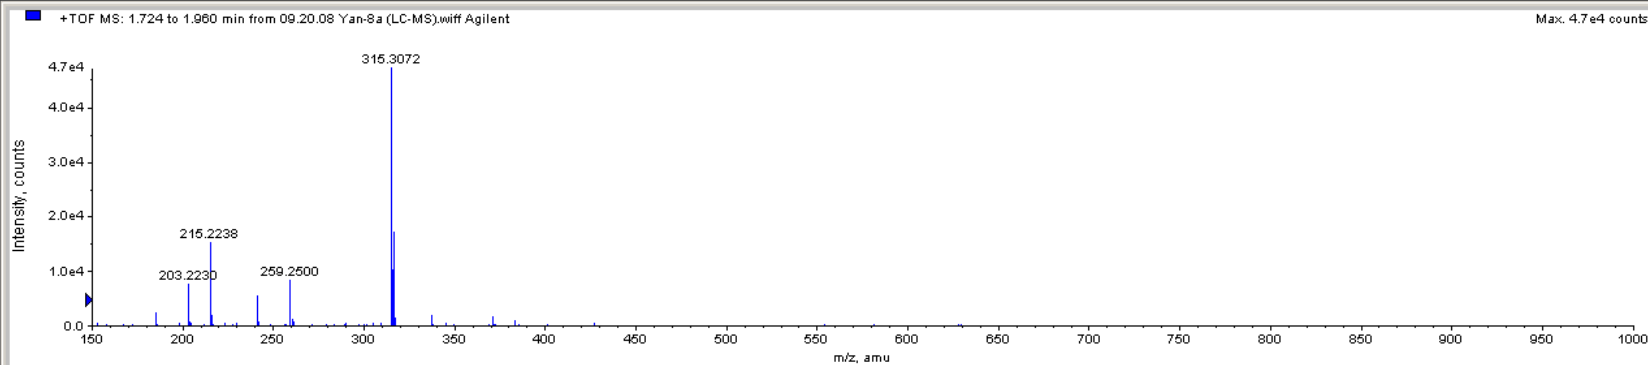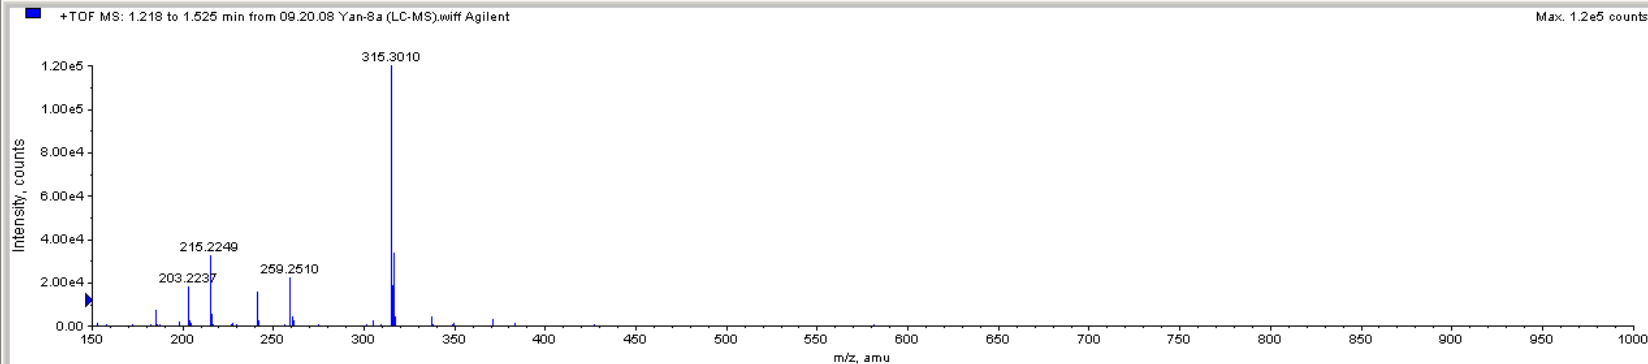

7.54  
7.53

# <sup>1</sup>H NMR Spectrum

• 5 CF<sub>3</sub>COOH

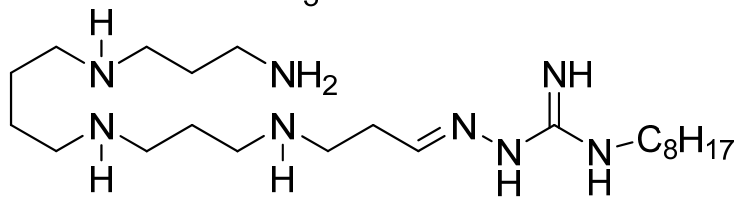

**8b**

3.45  
3.42  
3.40  
3.38  
3.38  
3.37  
3.37  
3.35  
3.30  
3.28  
3.25  
3.24  
3.22  
3.20  
3.18  
3.16  
3.14  
3.13  
3.11  
3.10  
3.08  
3.06  
3.03  
2.81  
2.79  
2.78  
2.77  
2.13  
2.12  
2.11  
2.09  
2.04  
1.82  
1.79  
1.61  
1.37  
1.35  
1.34  
1.33  
0.97  
0.94  
0.92  
0.90  
0.87

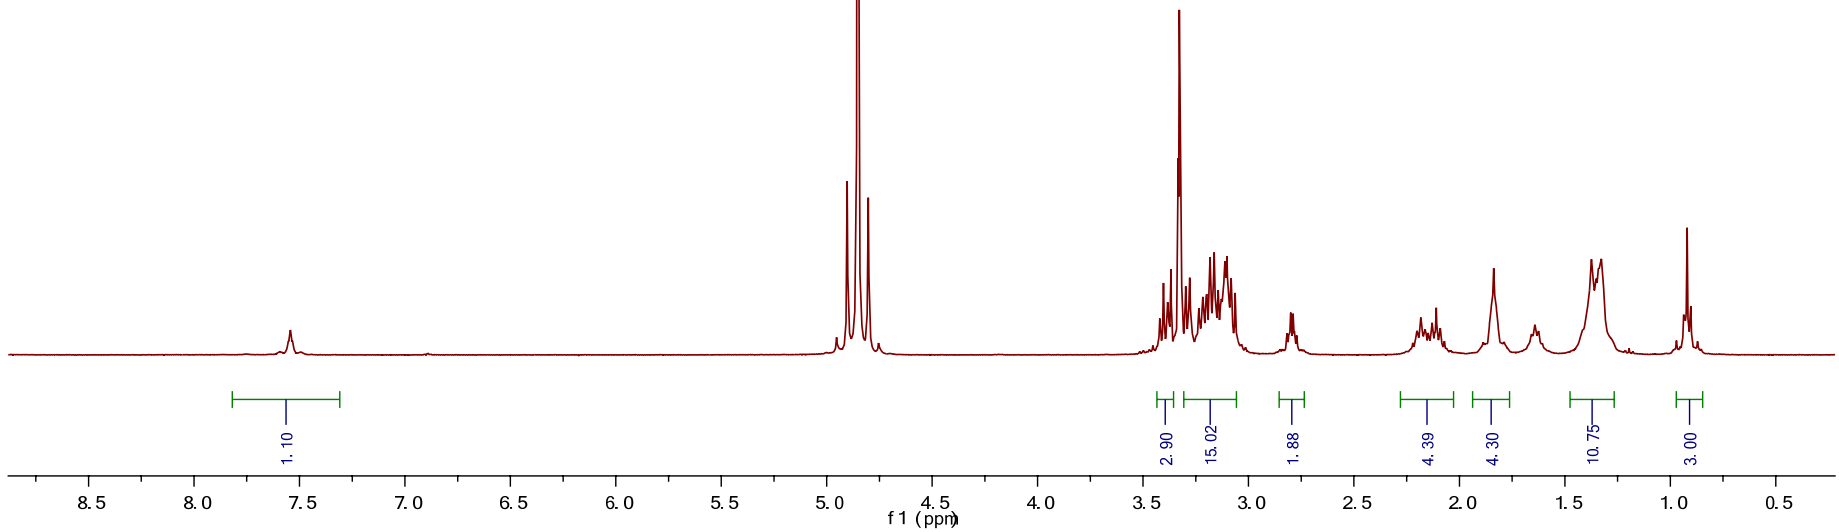

161.86  
161.59

117.86  
115.55

46.81  
43.71  
41.14  
36.41  
31.54  
28.53  
26.28  
23.97  
22.81  
22.70  
22.29  
13.01

# $^{13}\text{C}$ NMR Spectrum

• 5  $\text{CF}_3\text{COOH}$

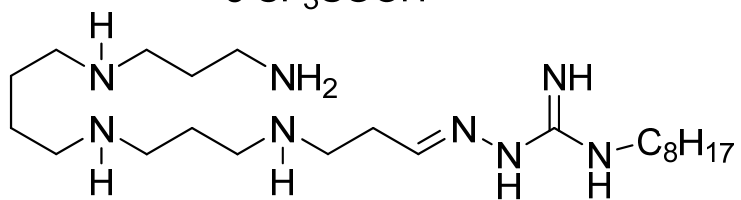

**8b**

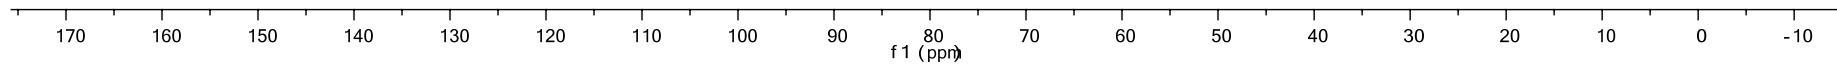



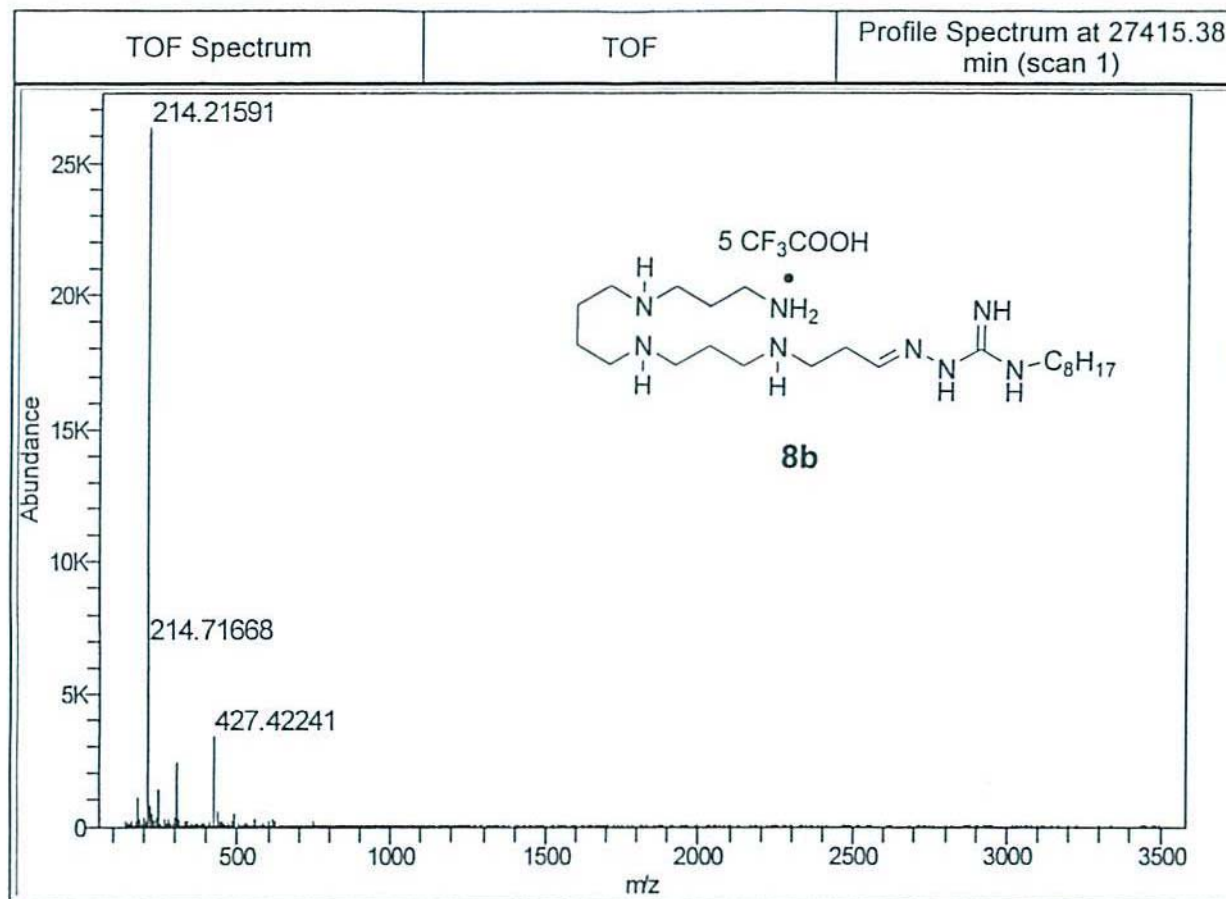

### LC-MS Data: Compound 8b

Column: C8 RP-HPLC (3.0 X 150 mm; stable-bond 3.5  $\mu$ M analytical)

Solvent system: Water (0.1% TFA) [A] / CH<sub>3</sub>CN (0.1%TFA) [B]; 5-100% B in 15 minutes; Flow-rate: 0.4 ml/min

Detection: Agilent ESI-TOF instrument (positive mode, 30 ppm accuracy)

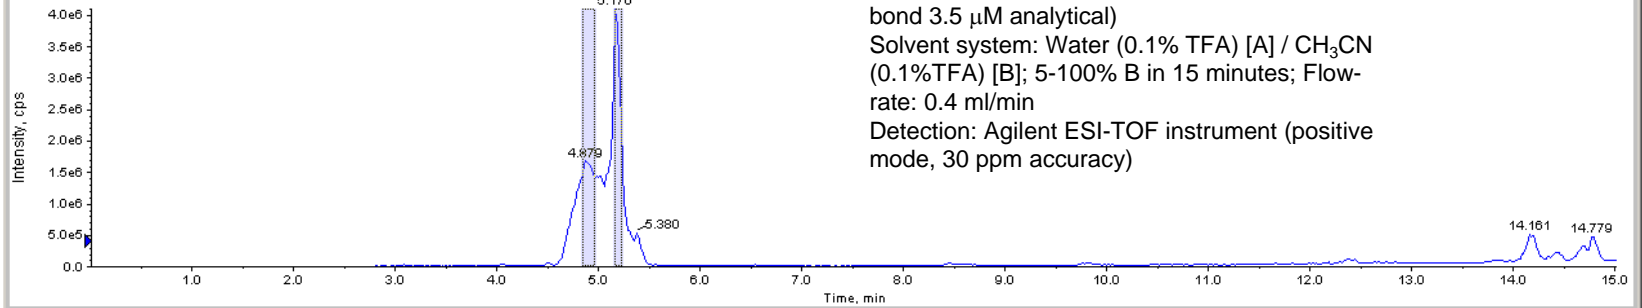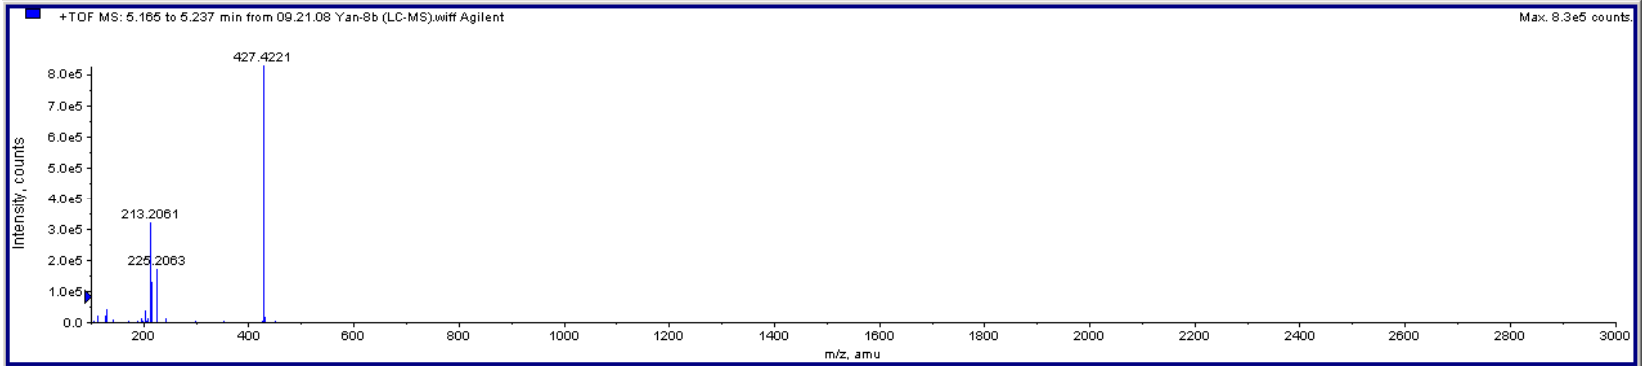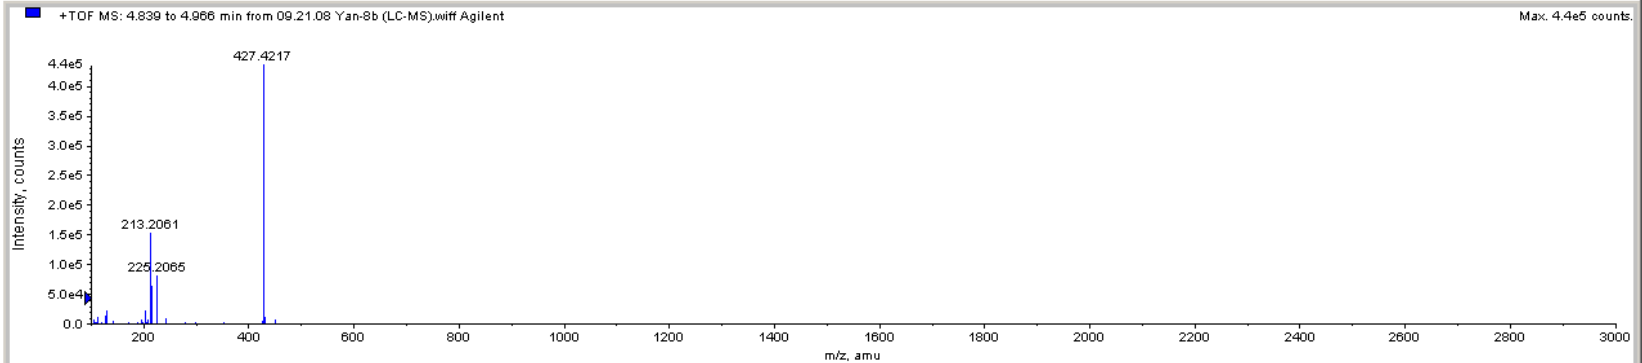

— 7.54

3.42  
3.40  
3.38  
3.38  
3.37  
3.30  
3.28  
3.23  
3.22  
3.20  
3.18  
3.16  
3.14  
3.13  
3.11  
3.10  
3.08  
3.06  
2.82  
2.80  
2.79  
2.78  
2.77  
2.18  
2.16  
2.15  
2.13  
2.11  
2.09  
— 1.84  
1.64  
1.62  
1.37  
1.32  
0.93  
0.90

# <sup>1</sup>H NMR Spectrum

• 5 CF<sub>3</sub>COOH

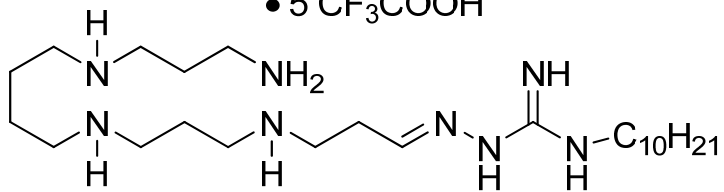

**8c**

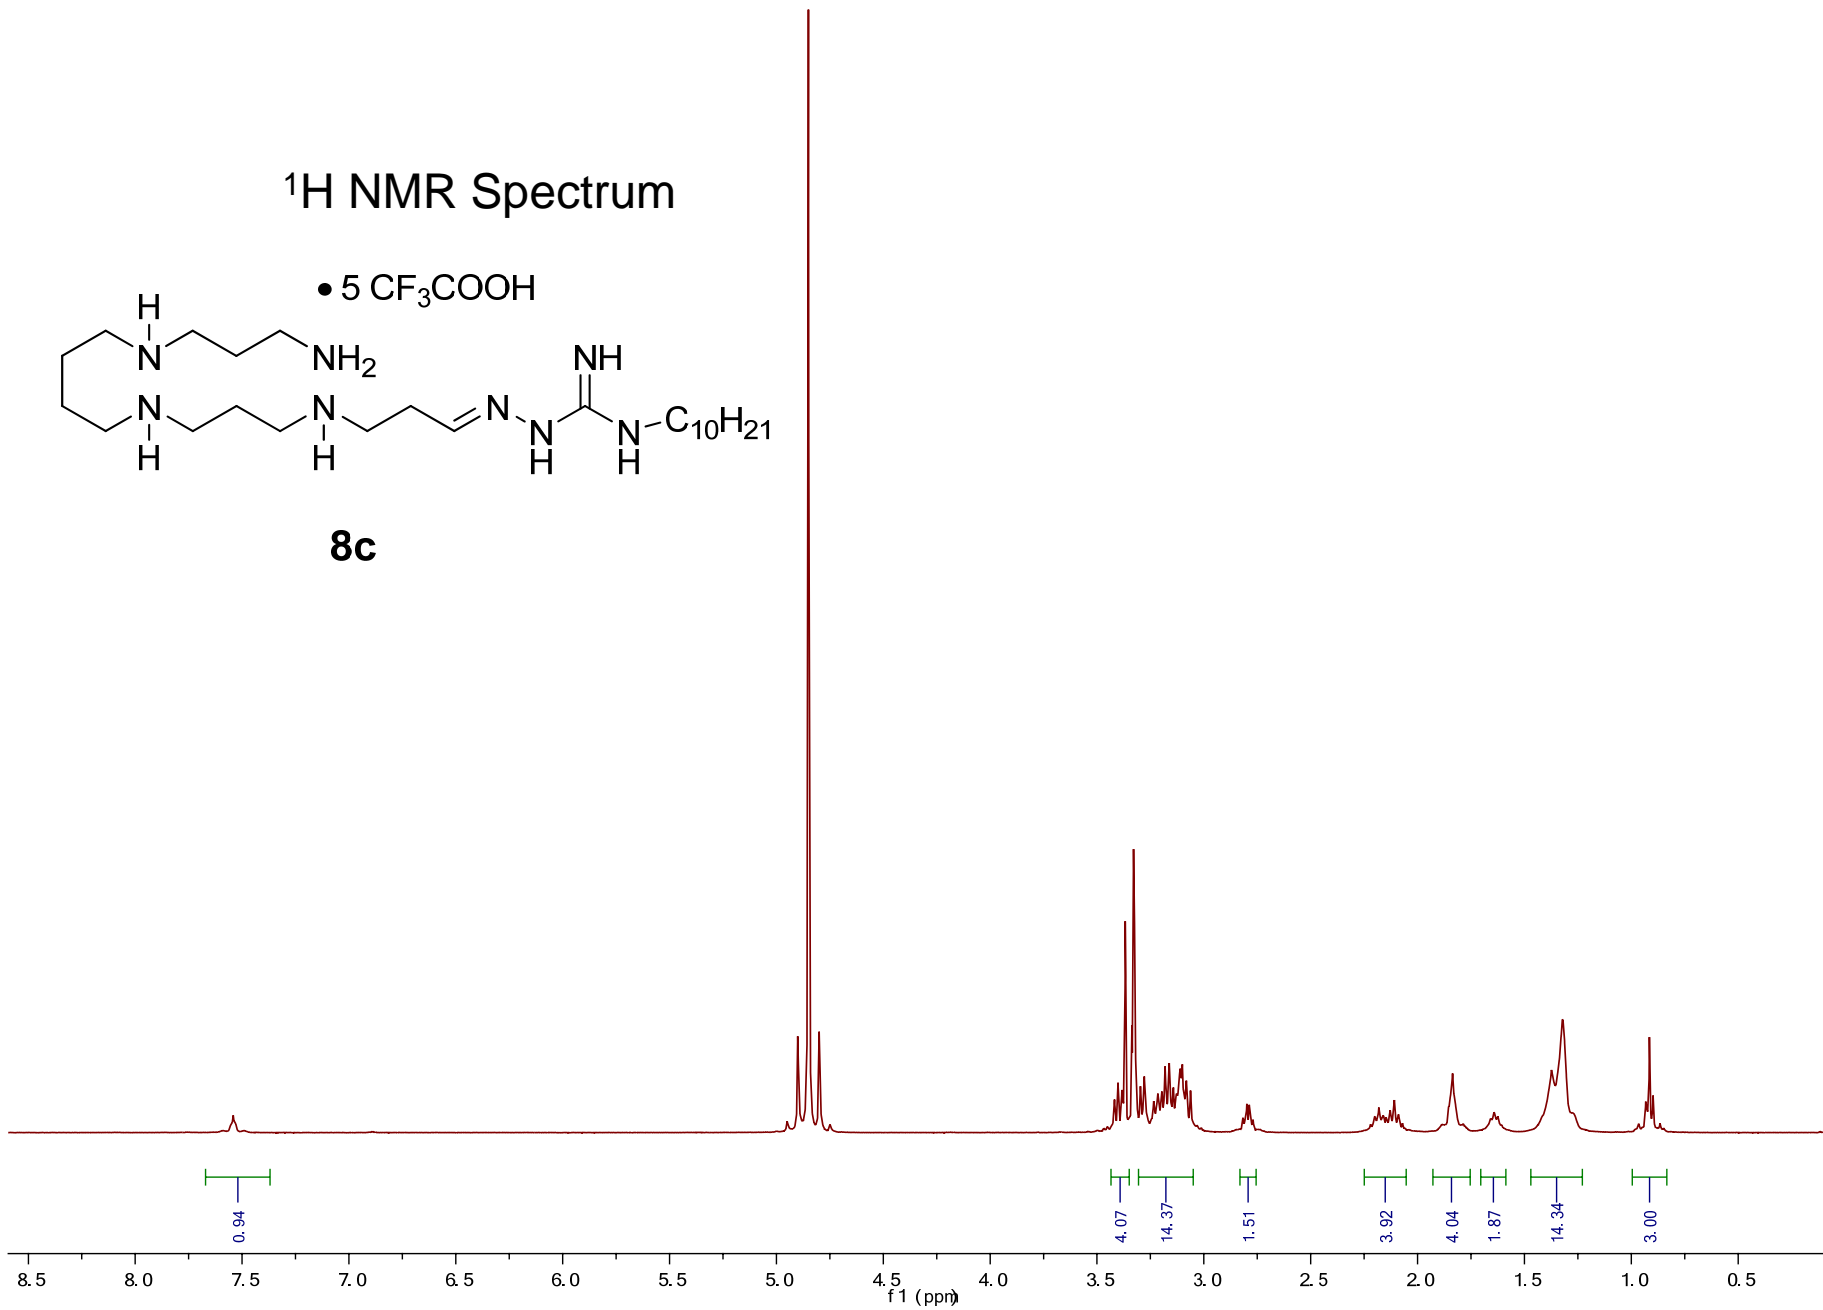

— 154.36

146.54  
146.49  
146.44

44.59  
44.40  
43.71  
41.14  
36.40  
31.64  
28.53  
26.28  
23.98  
22.81  
22.70  
22.32  
13.03

# <sup>13</sup>C NMR Spectrum

• 5 CF<sub>3</sub>COOH

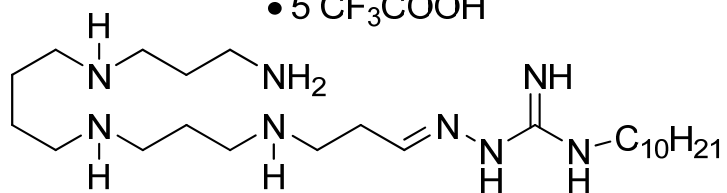

**8c**

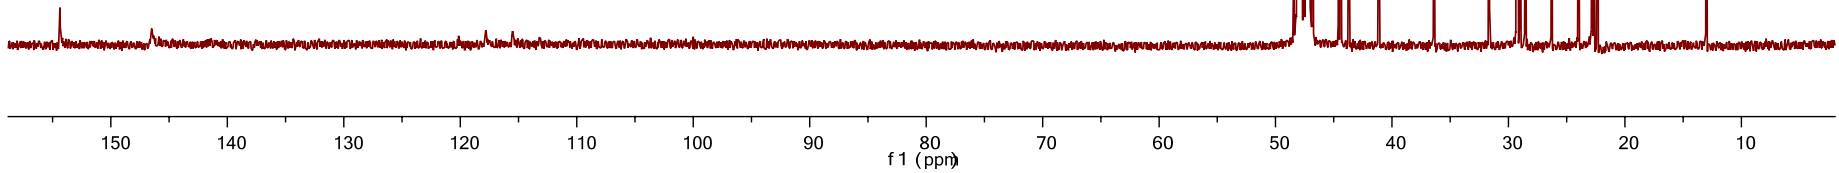

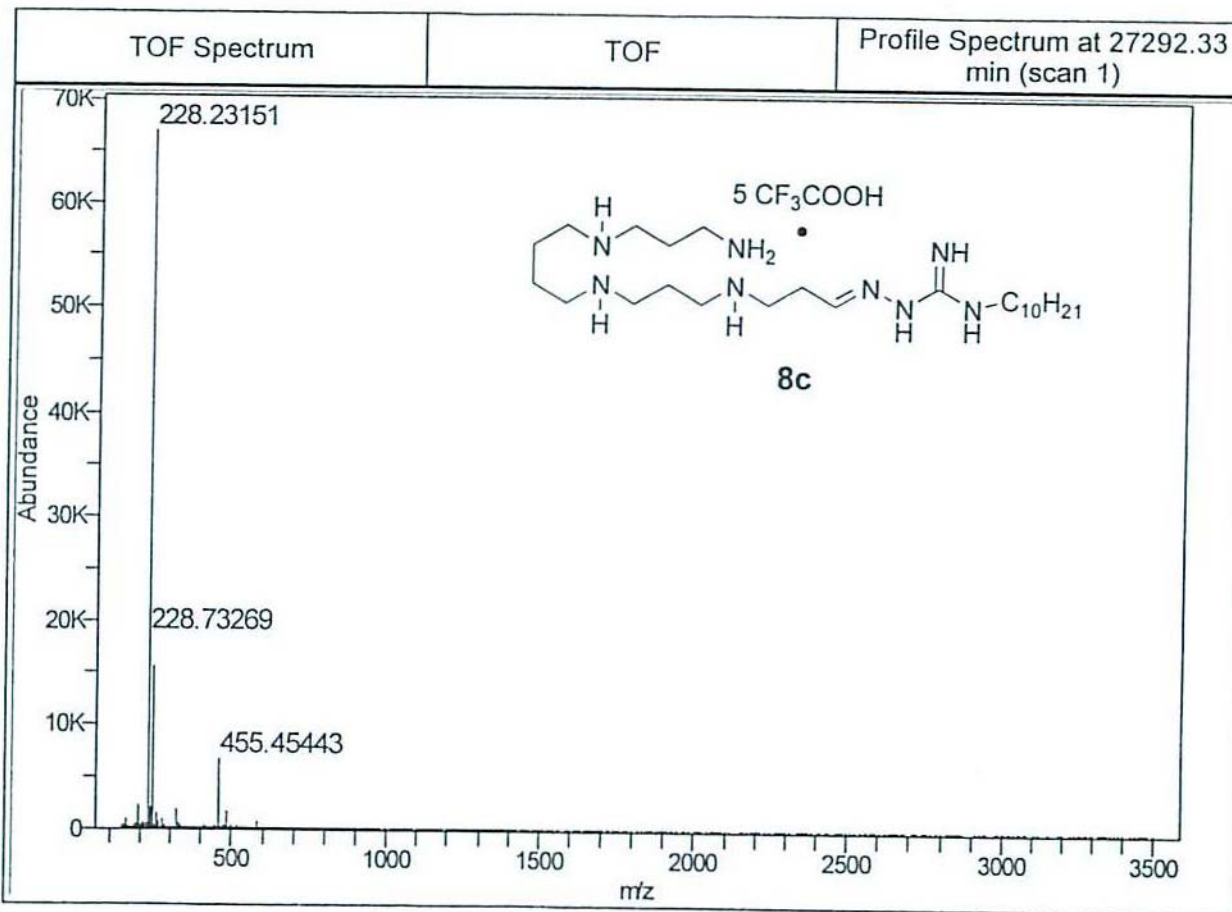

### LC-MS Data: Compound 8c

Column: C8 RP-HPLC (3.0 X 150 mm; stable-bond 3.5  $\mu$ M analytical)  
Solvent system: Water (0.1% TFA) [A] / CH<sub>3</sub>CN (0.1%TFA) [B]; 5-100% B in 15 minutes; Flow-rate: 0.4 ml/min  
Detection: Agilent ESI-TOF instrument (positive mode, 30 ppm accuracy)

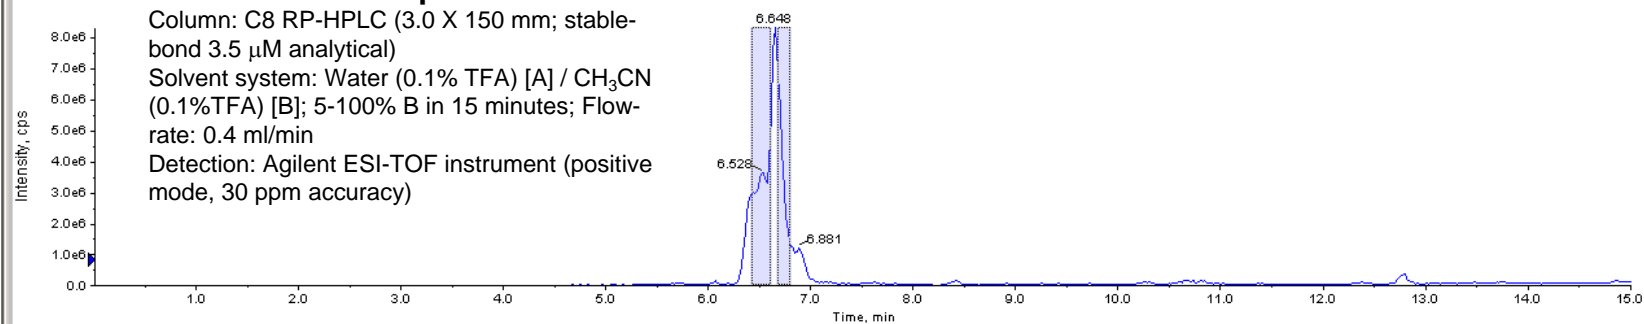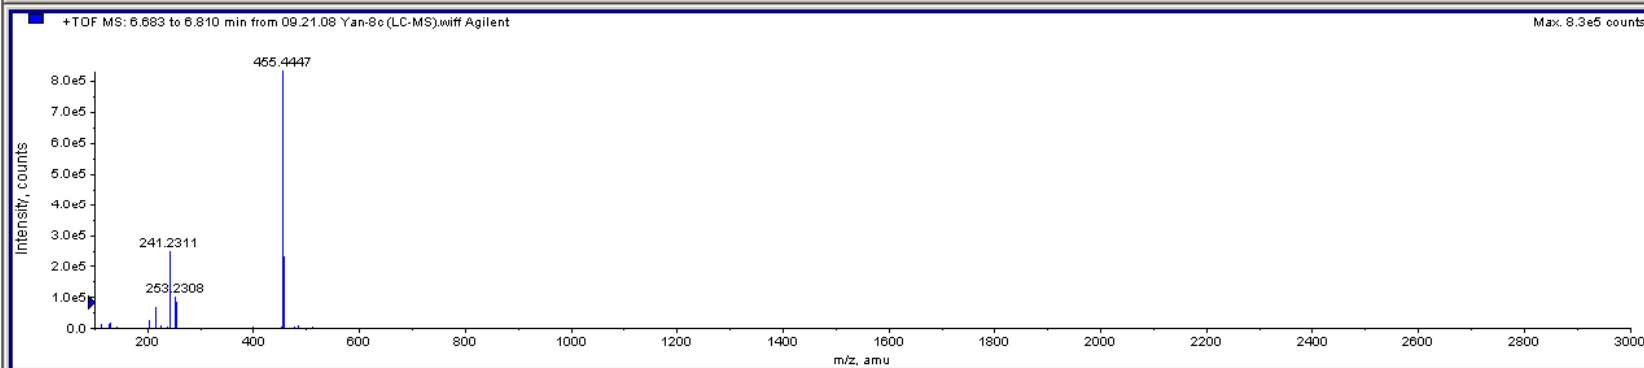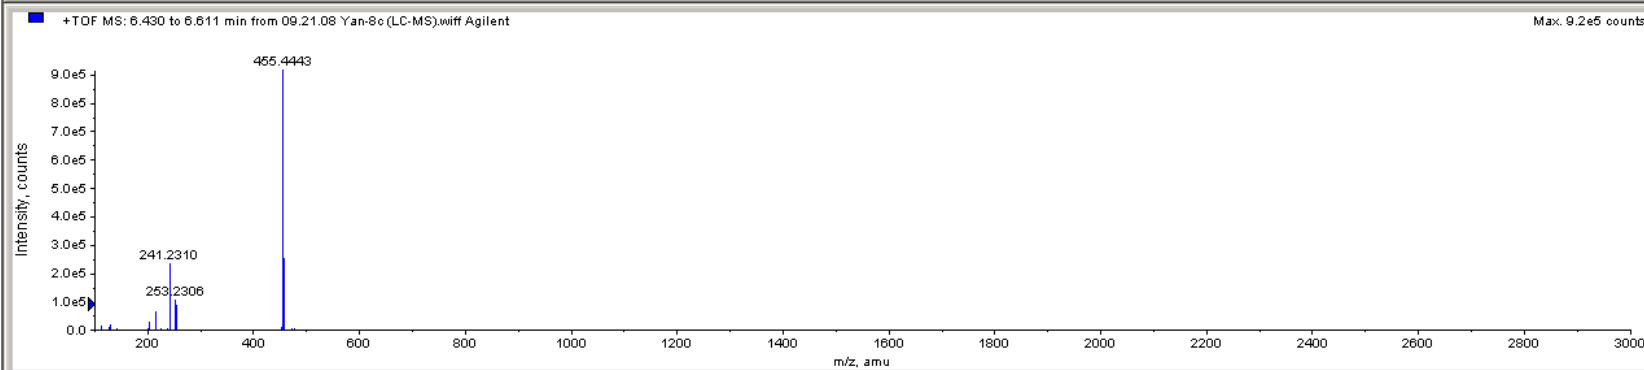

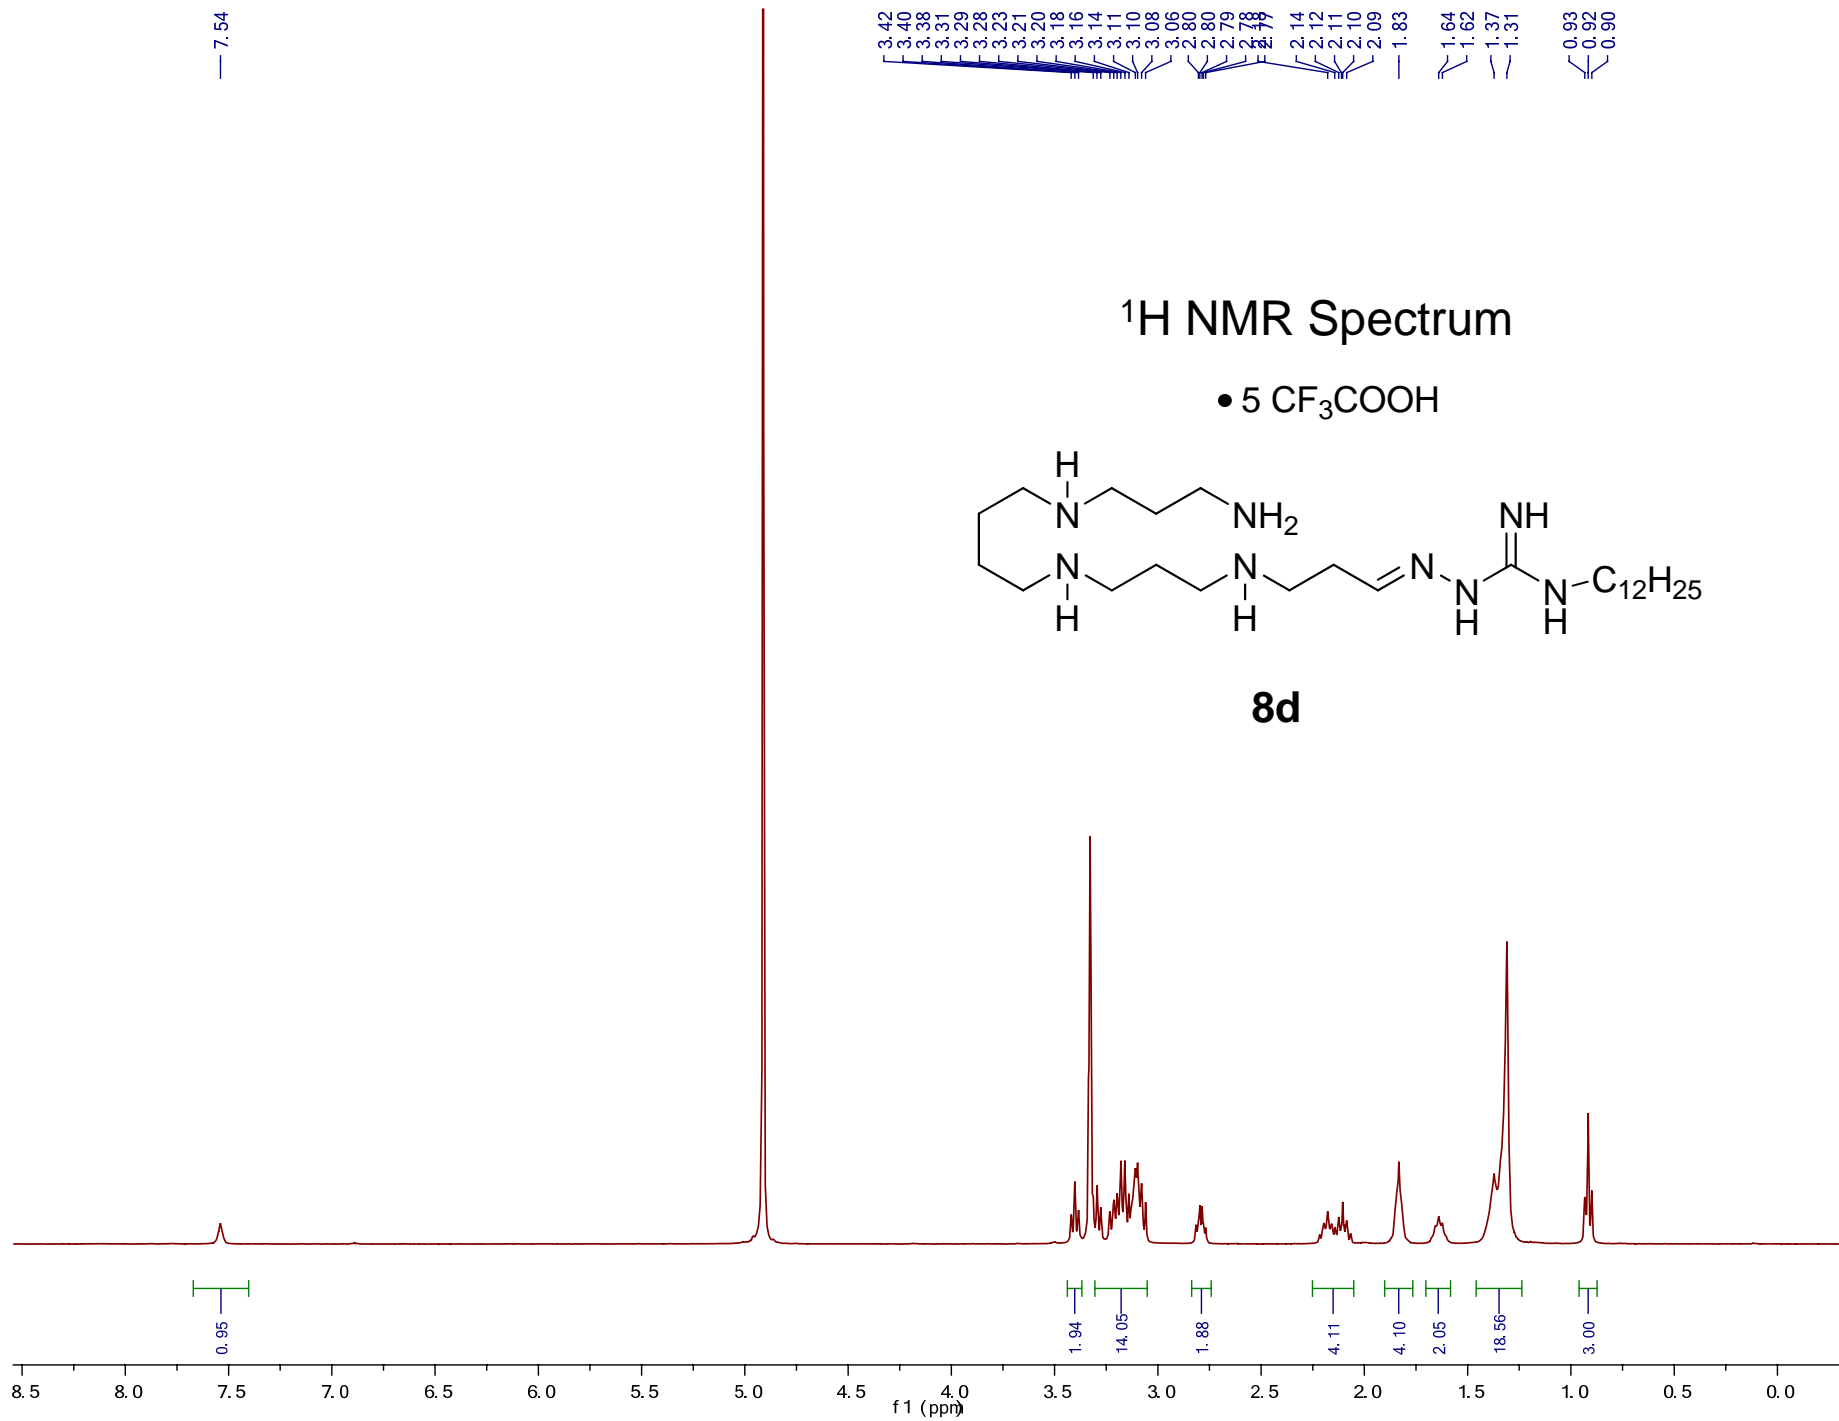

— 154.37  
146.62  
146.57  
146.54

— 117.77  
115.46  
115.43

44.59  
44.43  
44.40  
43.71  
41.14  
36.40  
31.67  
28.96  
26.29  
23.97  
22.81  
22.70  
22.33  
13.03

# <sup>13</sup>C NMR Spectrum

• 5 CF<sub>3</sub>COOH

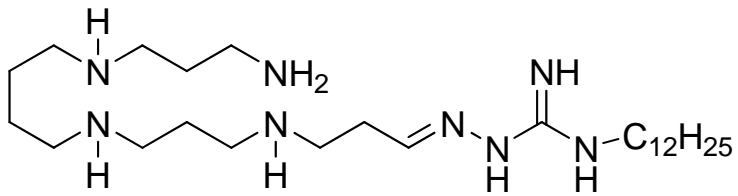

**8d**

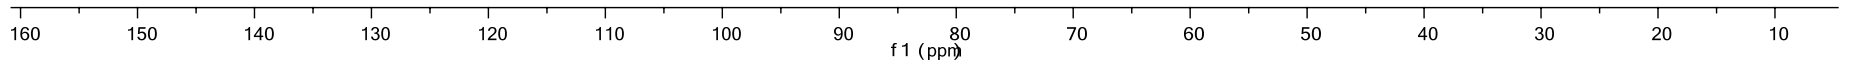





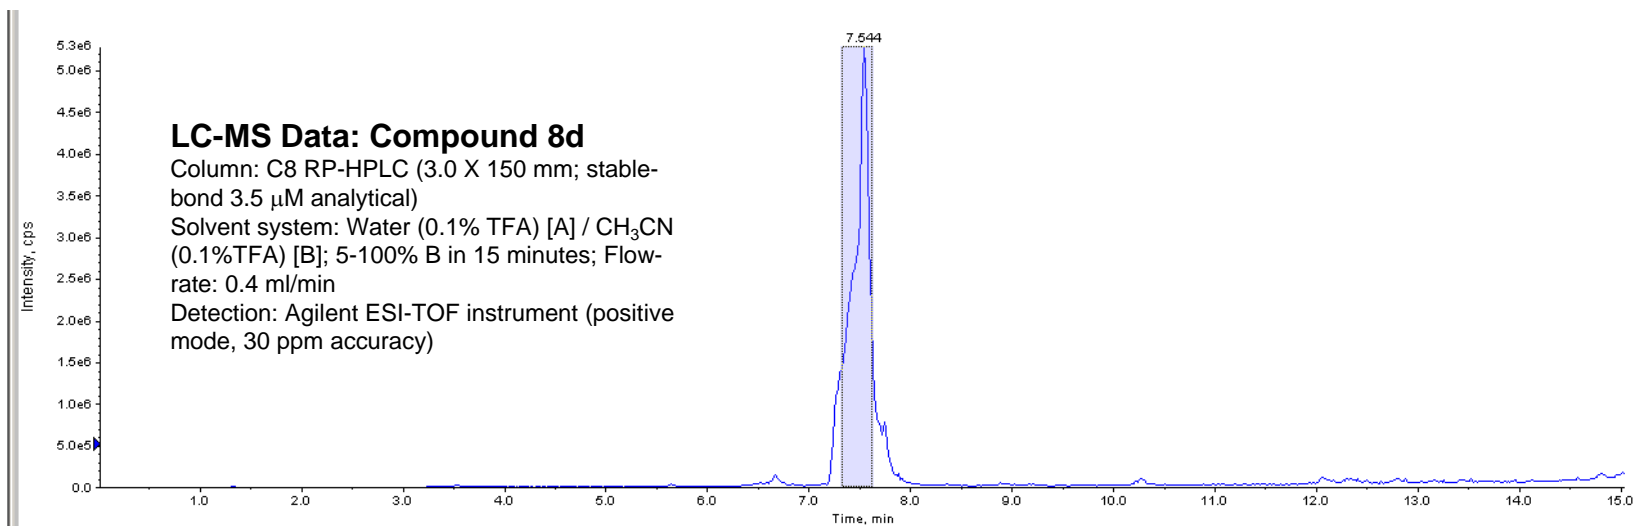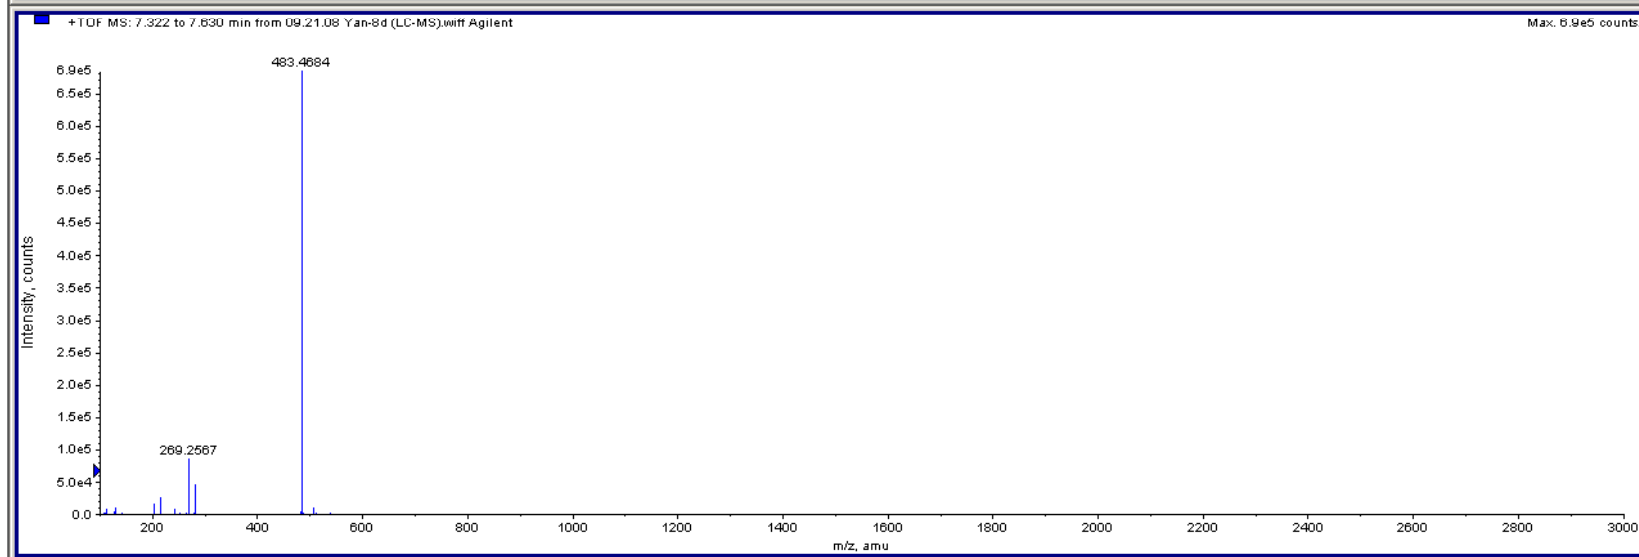

— 7.54

# $^1\text{H}$ NMR Spectrum

• 5  $\text{CF}_3\text{COOH}$

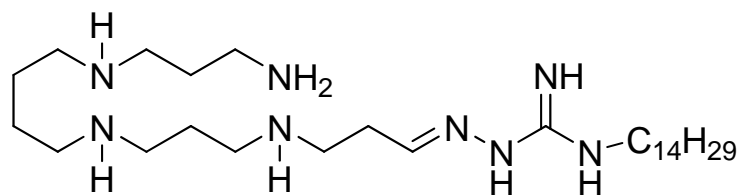

**8e**

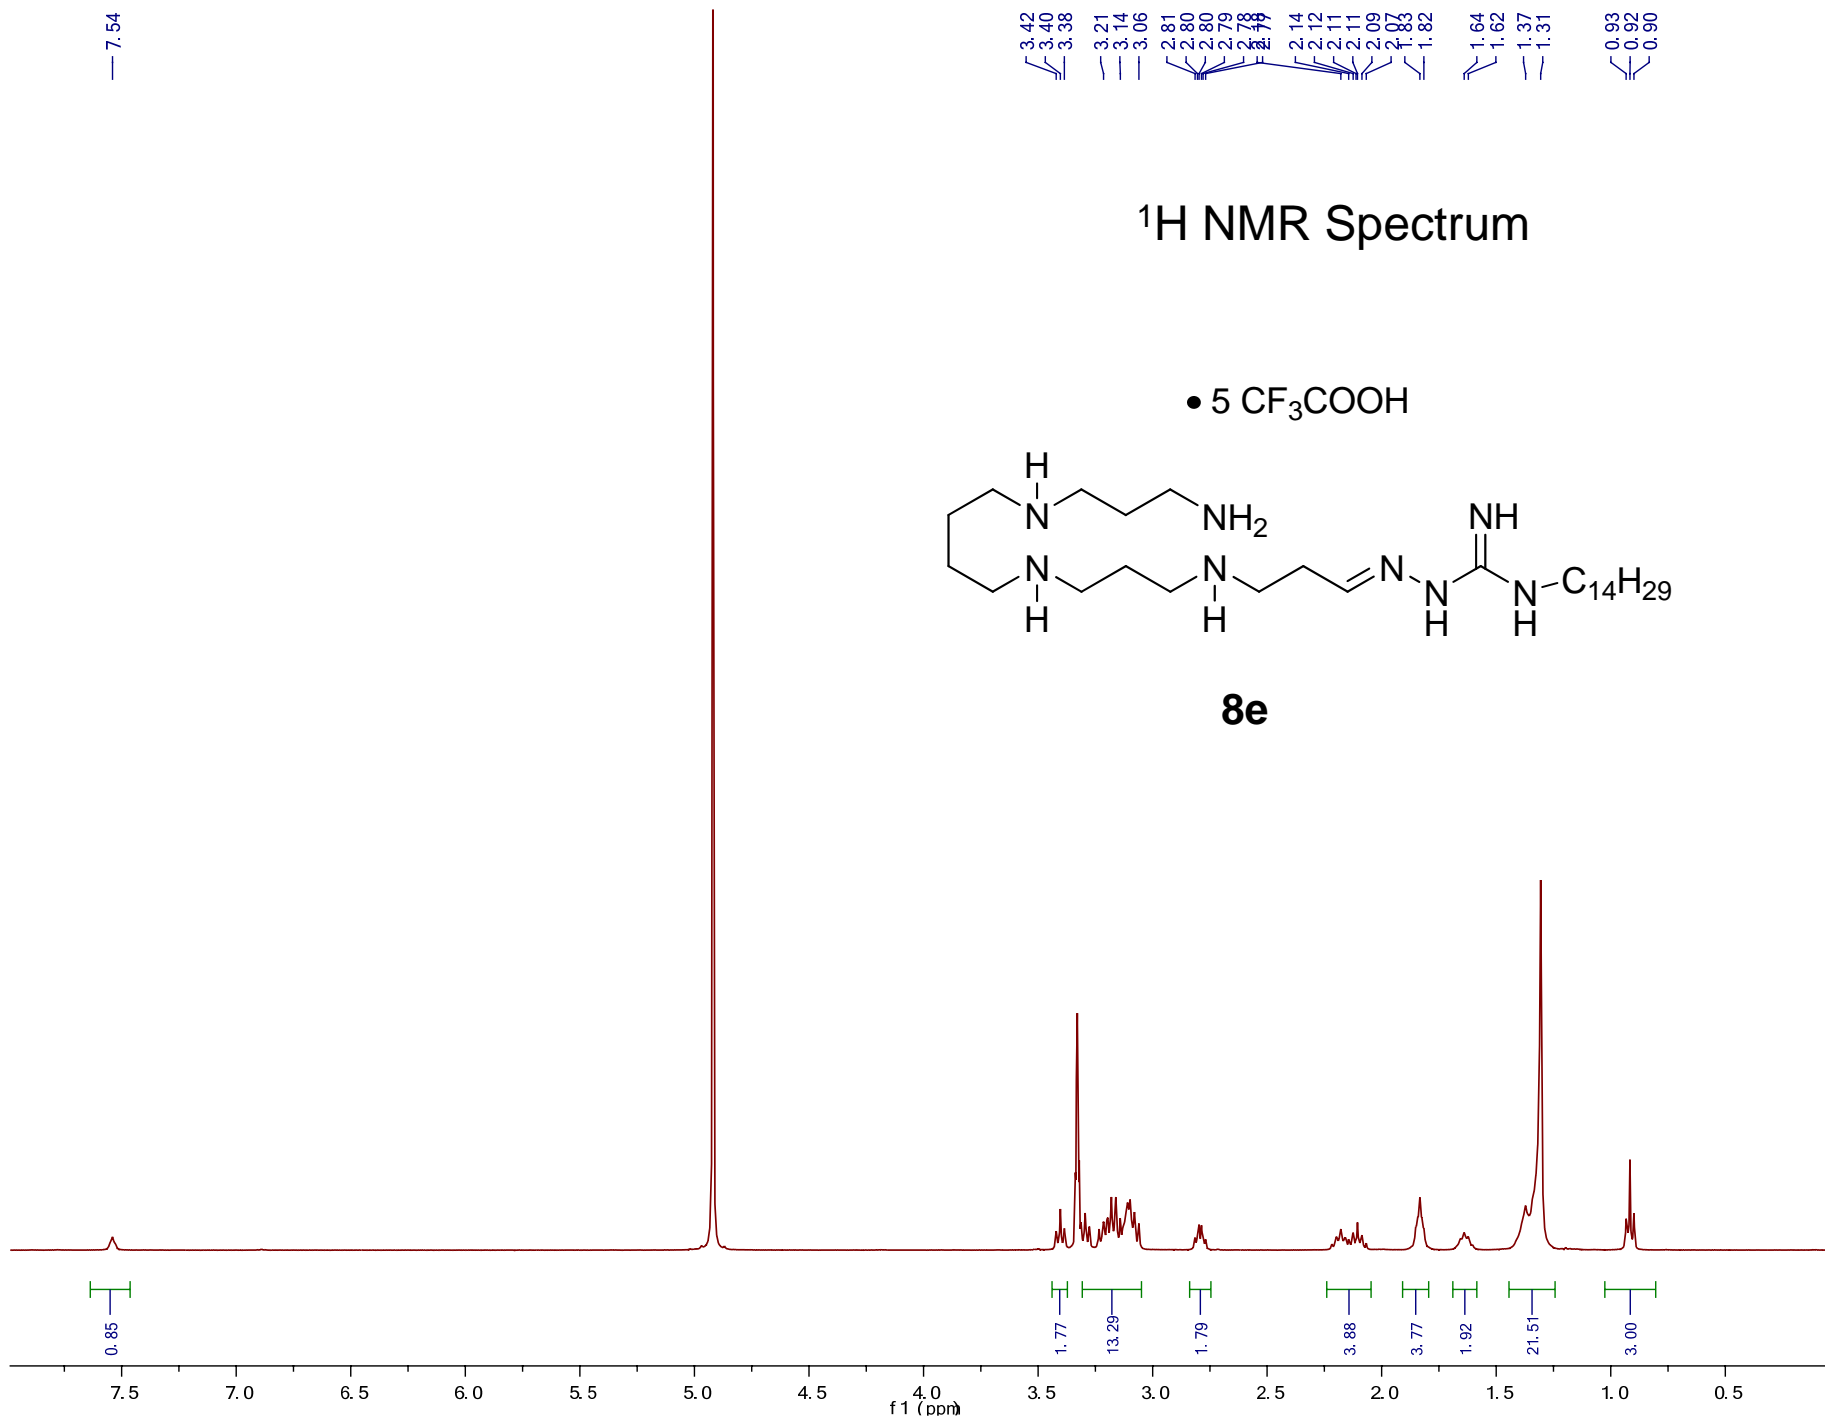

# <sup>13</sup>C NMR Spectrum

• 5 CF<sub>3</sub>COOH

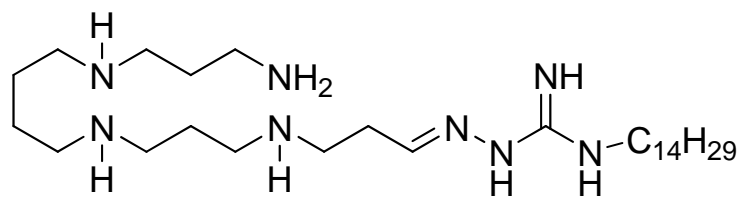

**8e**

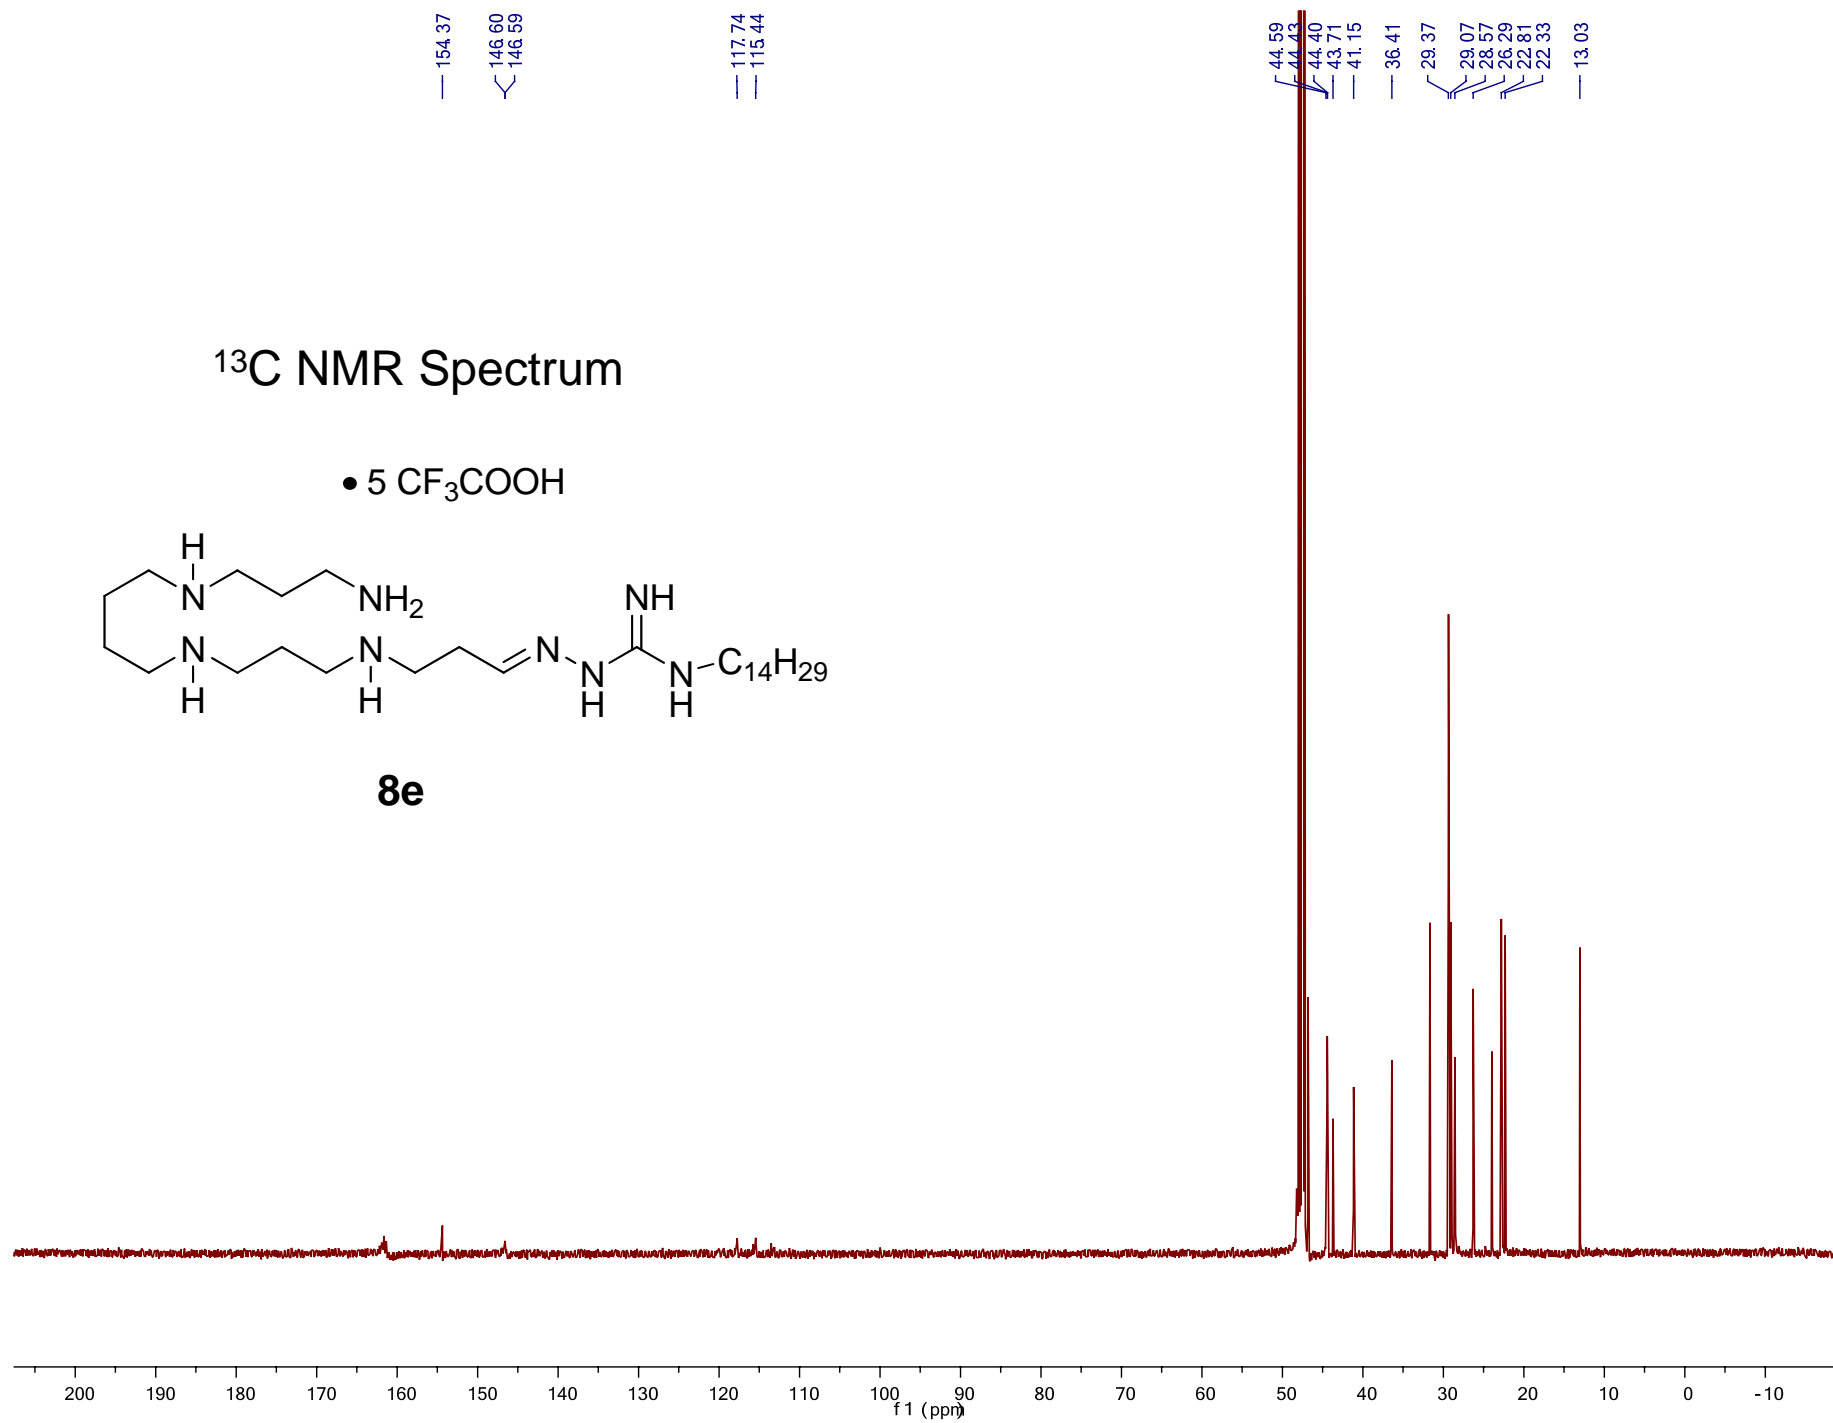

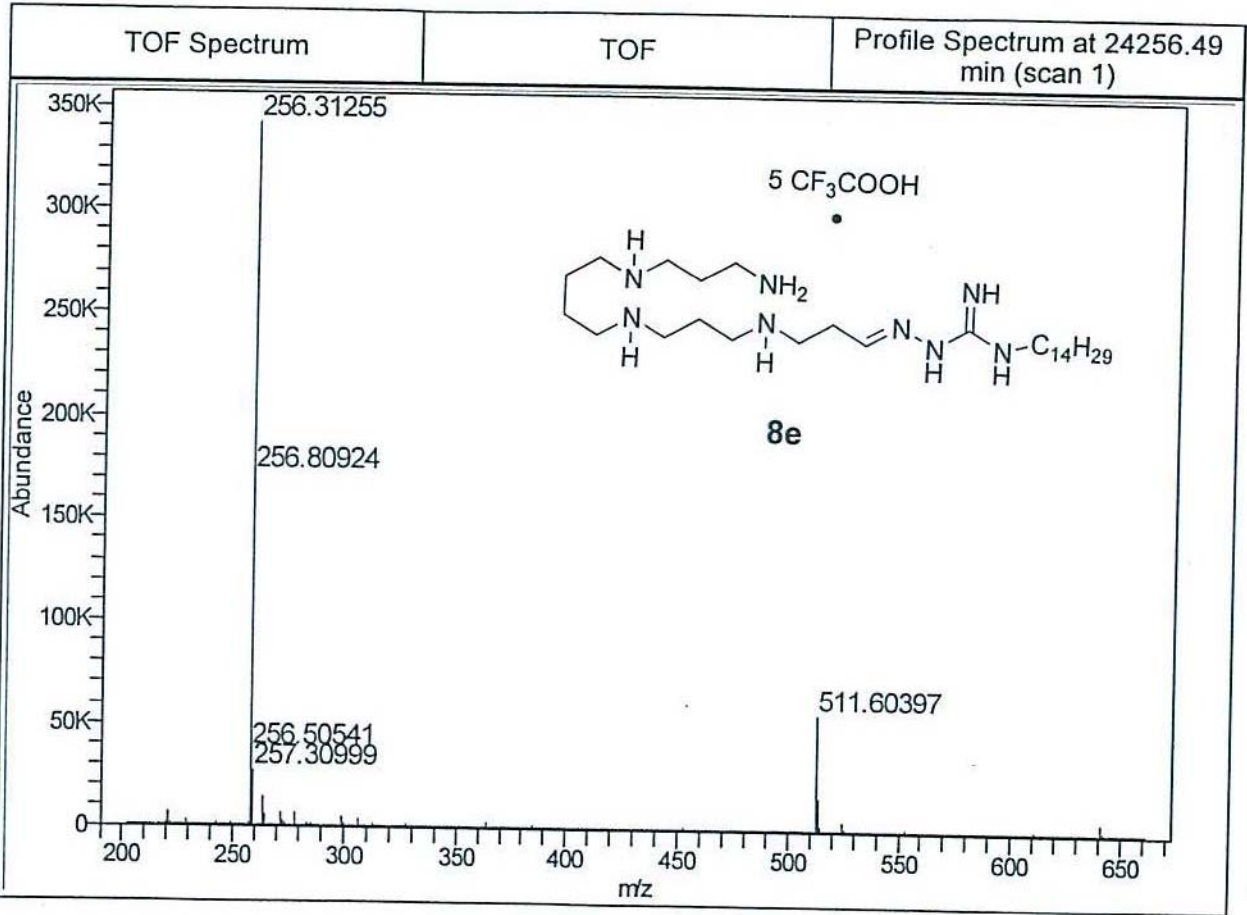

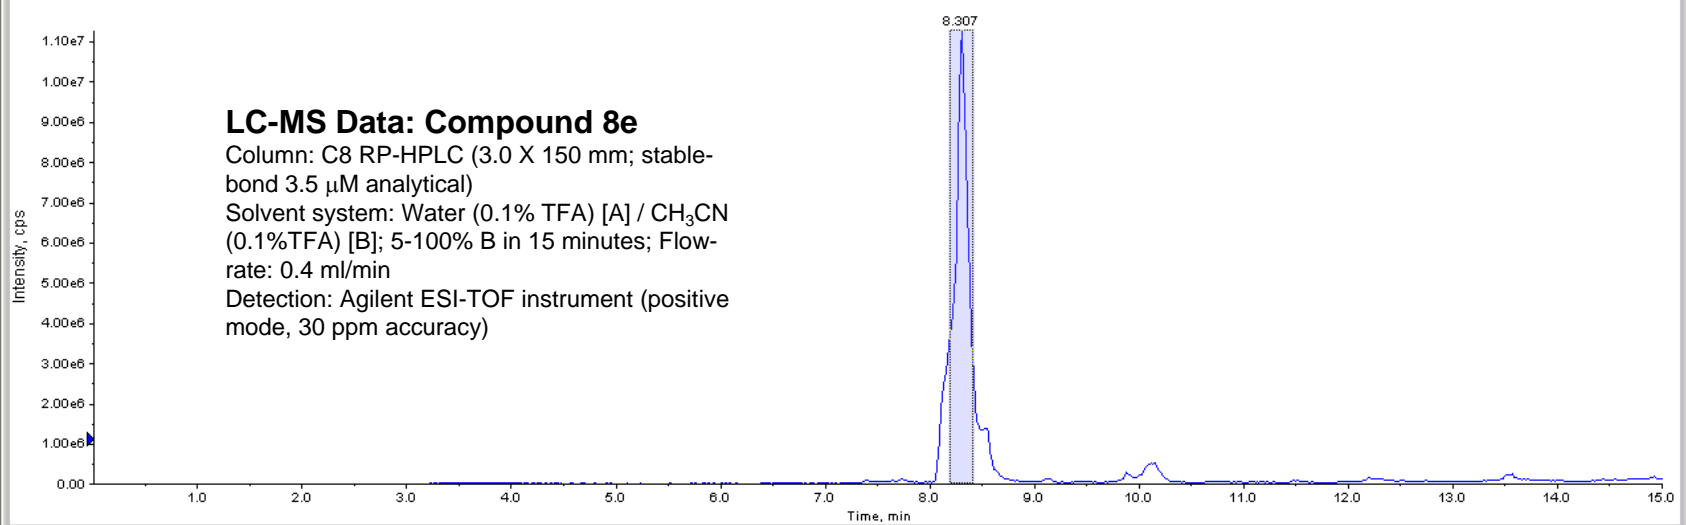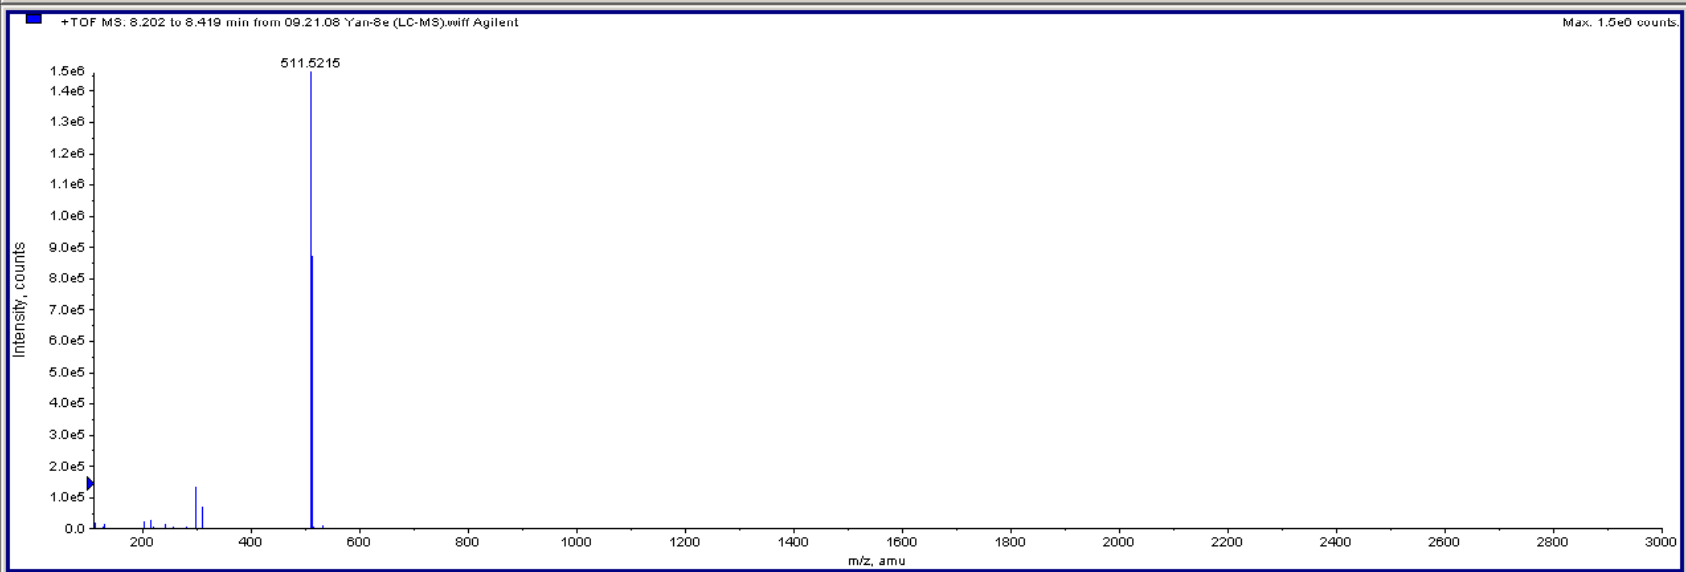

# <sup>1</sup>H NMR Spectrum

• 5 CF<sub>3</sub>COOH

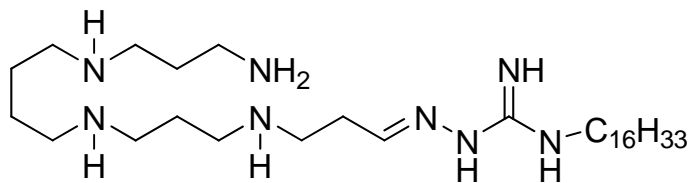

**8f**

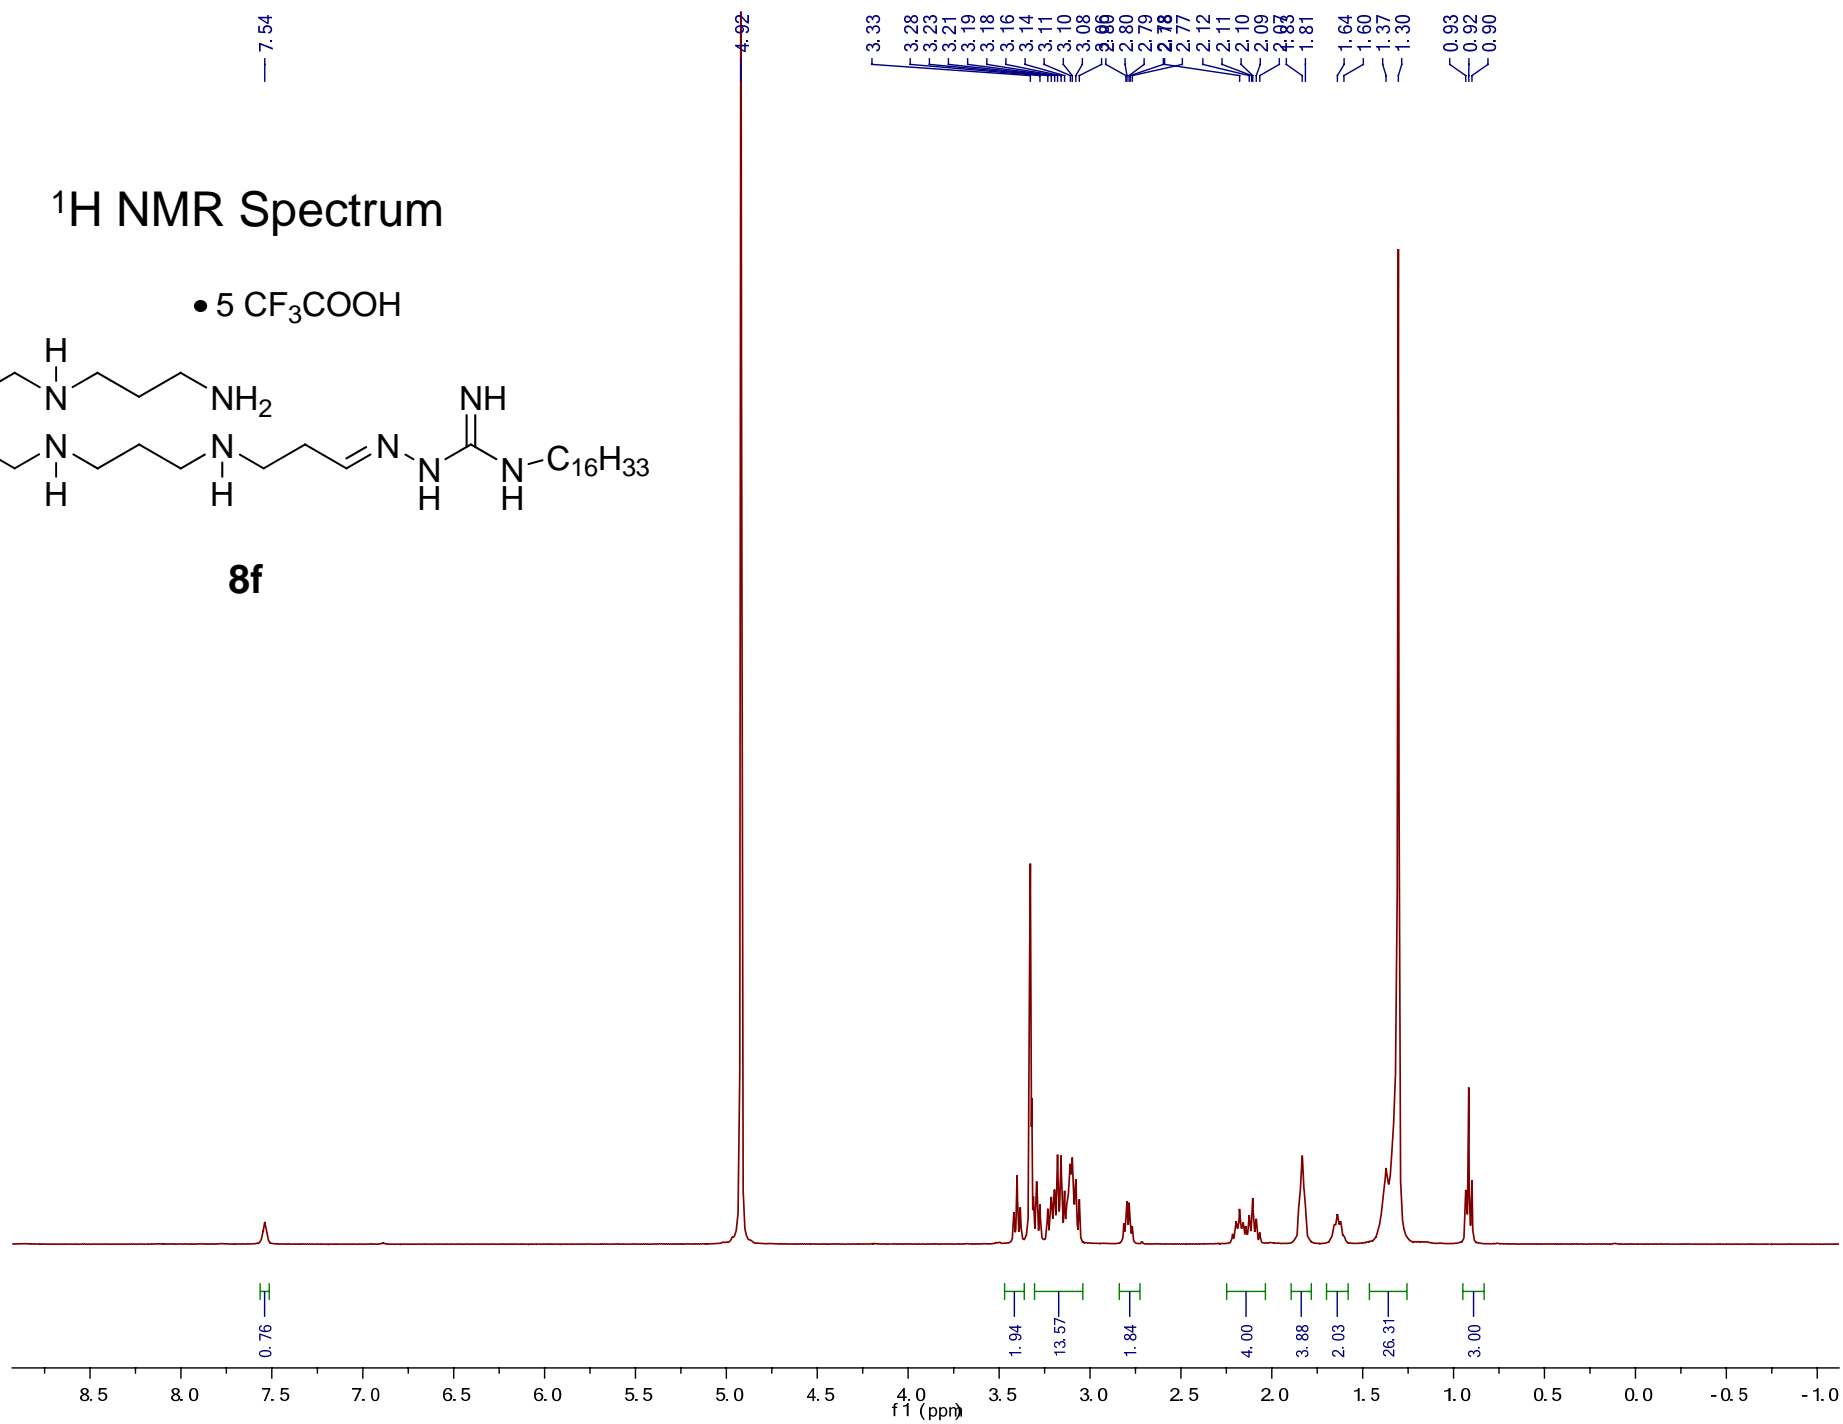

— 154.36

146.63  
146.59  
146.55

— 117.81  
— 115.47

44.60

44.41

43.72

41.15

— 36.41

— 31.67

— 28.57

— 26.29

— 23.96

22.81

22.70

22.33

— 13.05

# <sup>13</sup>C NMR Spectrum

• 5 CF<sub>3</sub>COOH

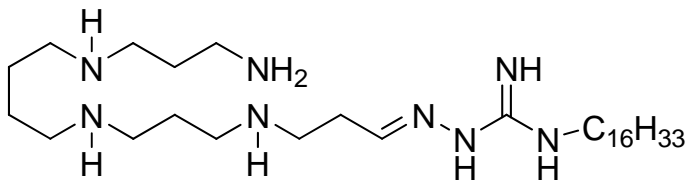

**8f**

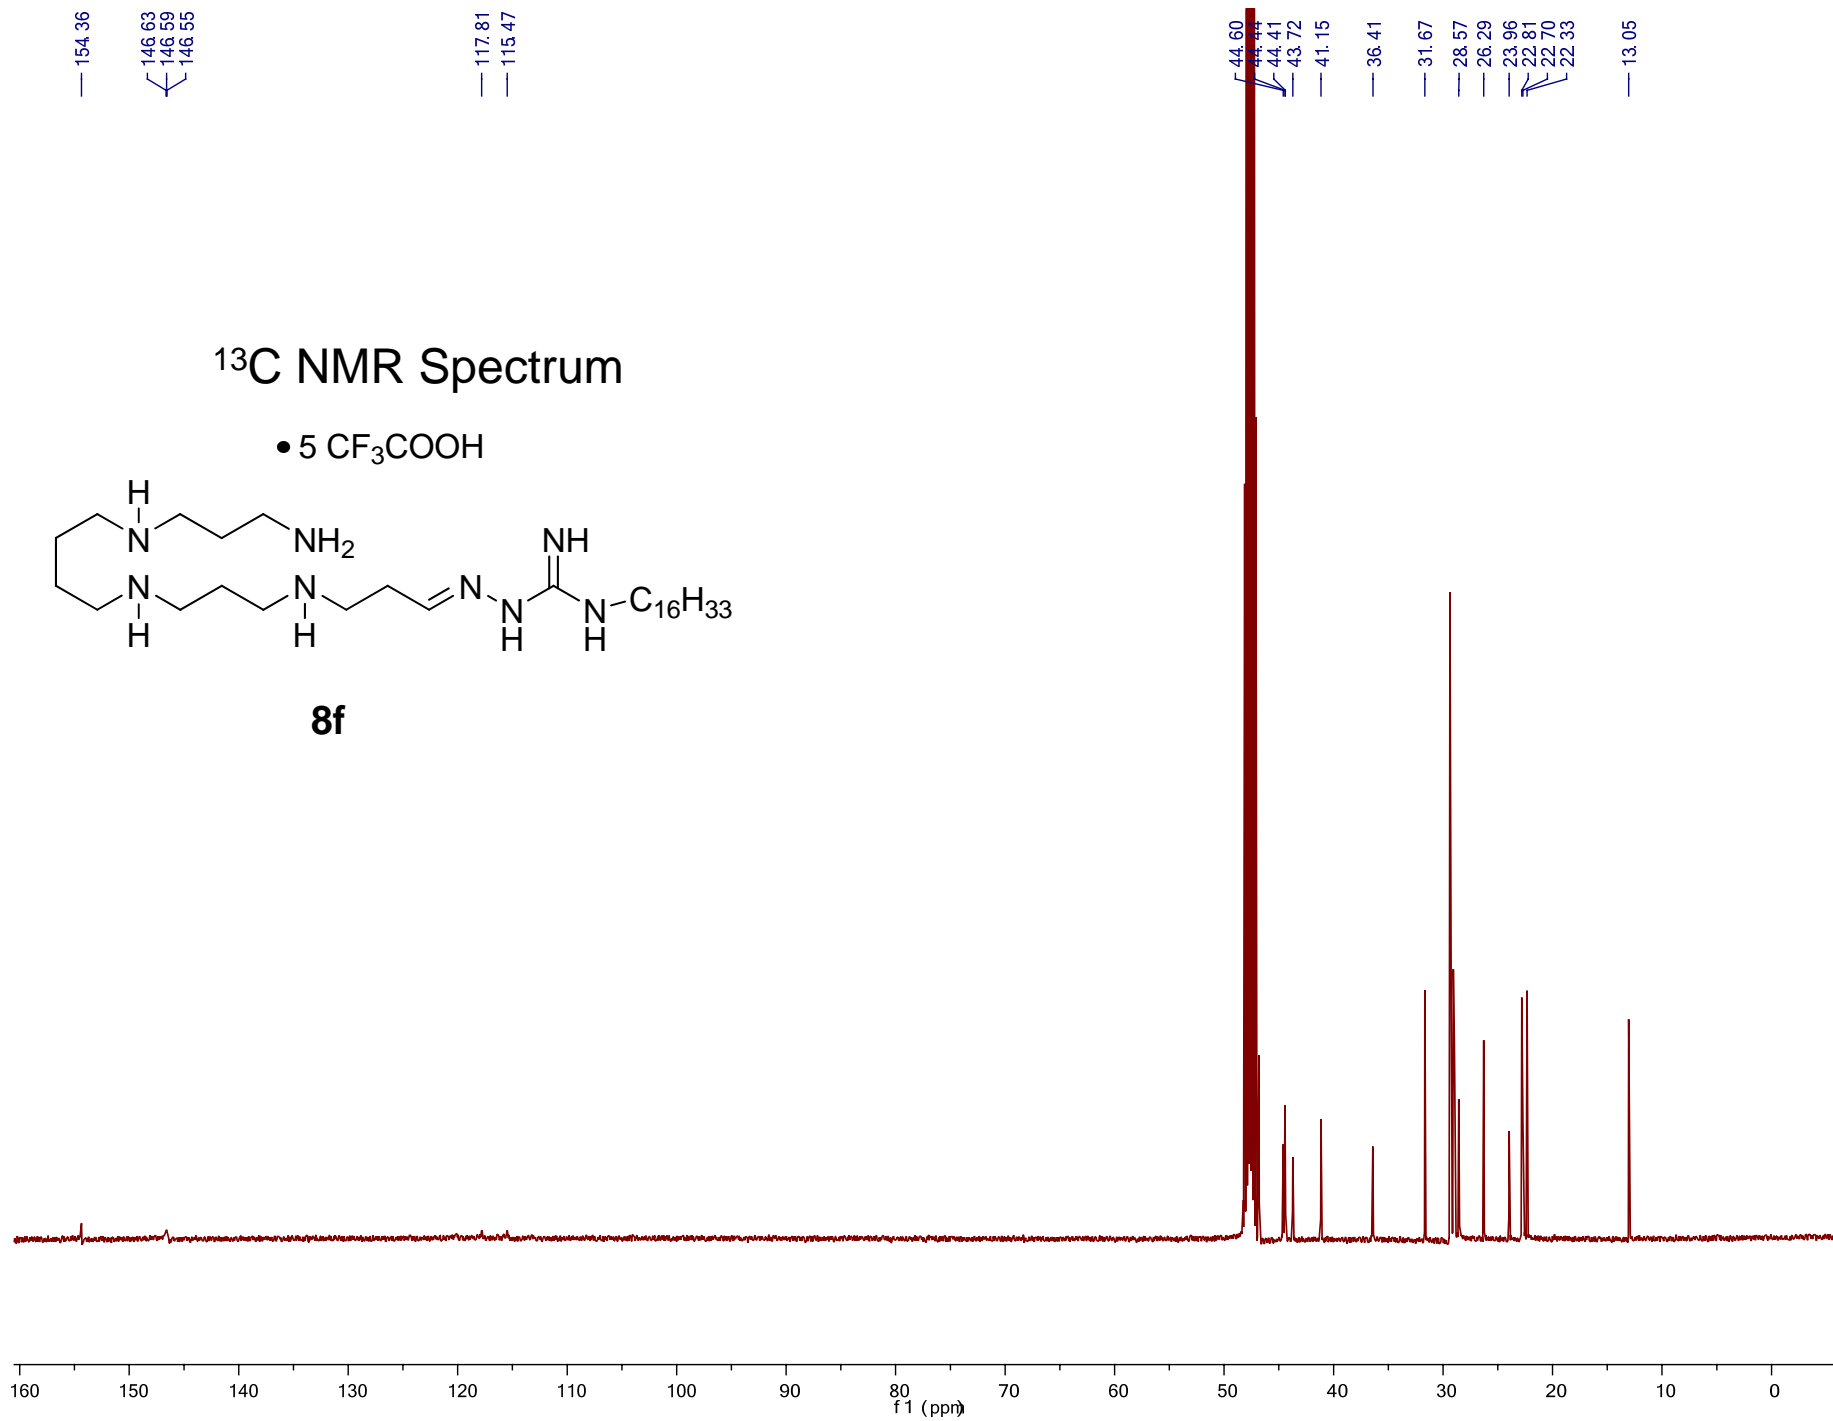



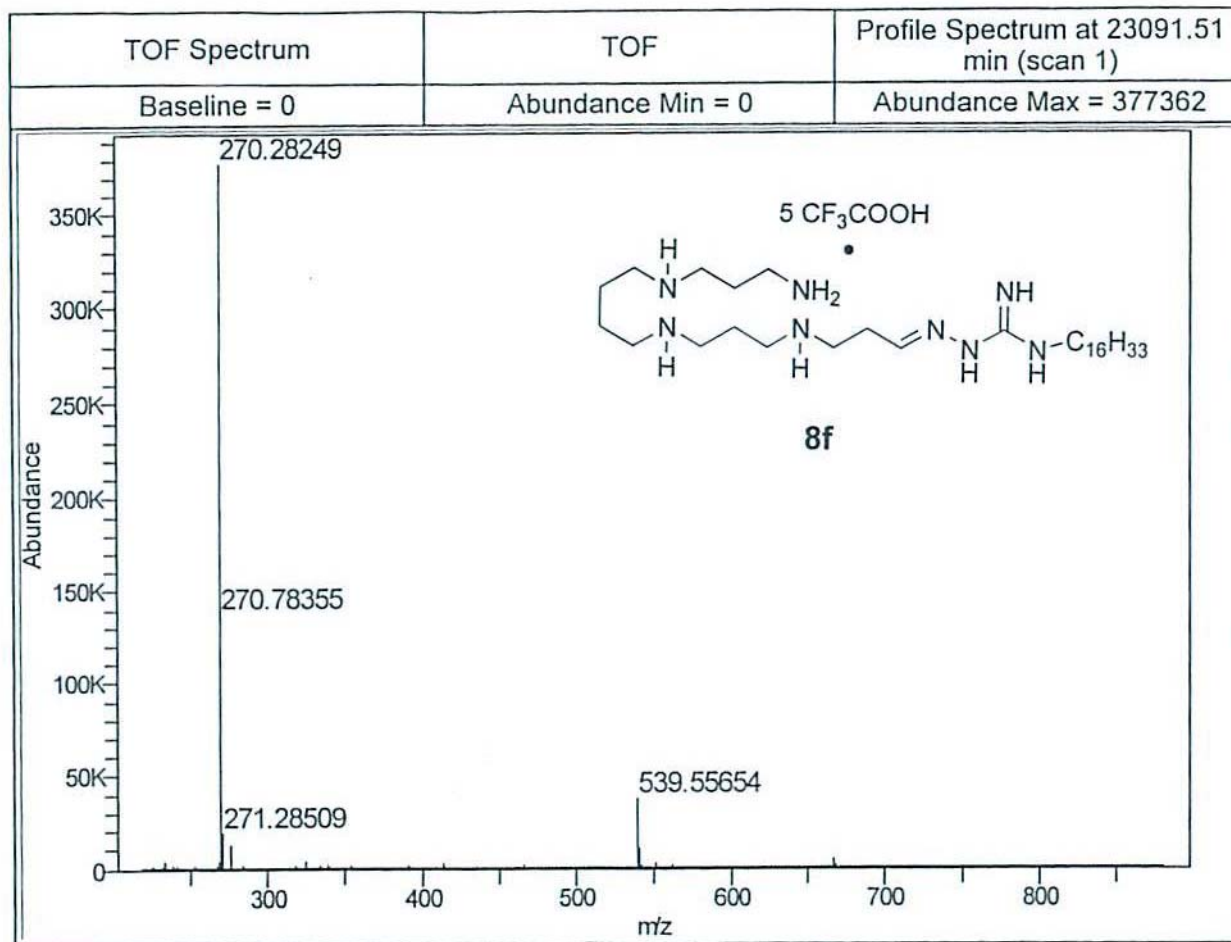

### LC-MS Data: Compound 8f

Column: C8 RP-HPLC (3.0 X 150 mm; stable-bond 3.5  $\mu$ M analytical)  
Solvent system: Water (0.1% TFA) [A] / CH<sub>3</sub>CN (0.1%TFA) [B]; 5-100% B in 15 minutes; Flow-rate: 0.4 ml/min  
Detection: Agilent ESI-TOF instrument (positive mode, 30 ppm accuracy)

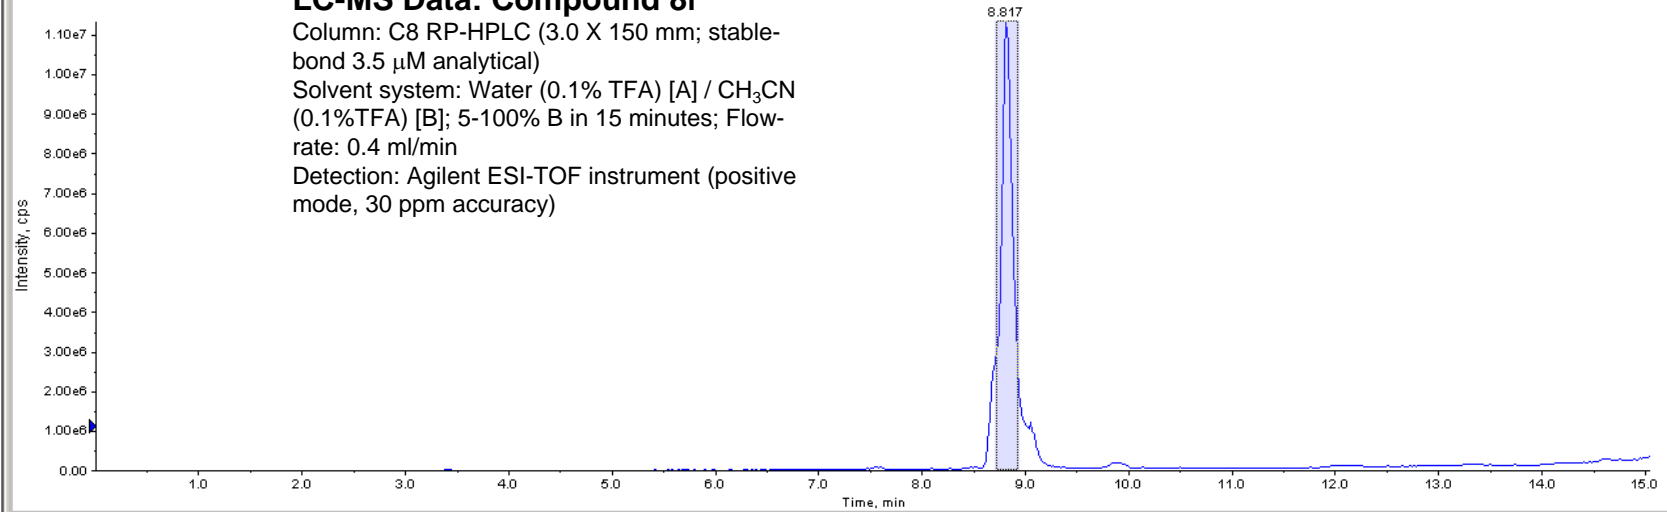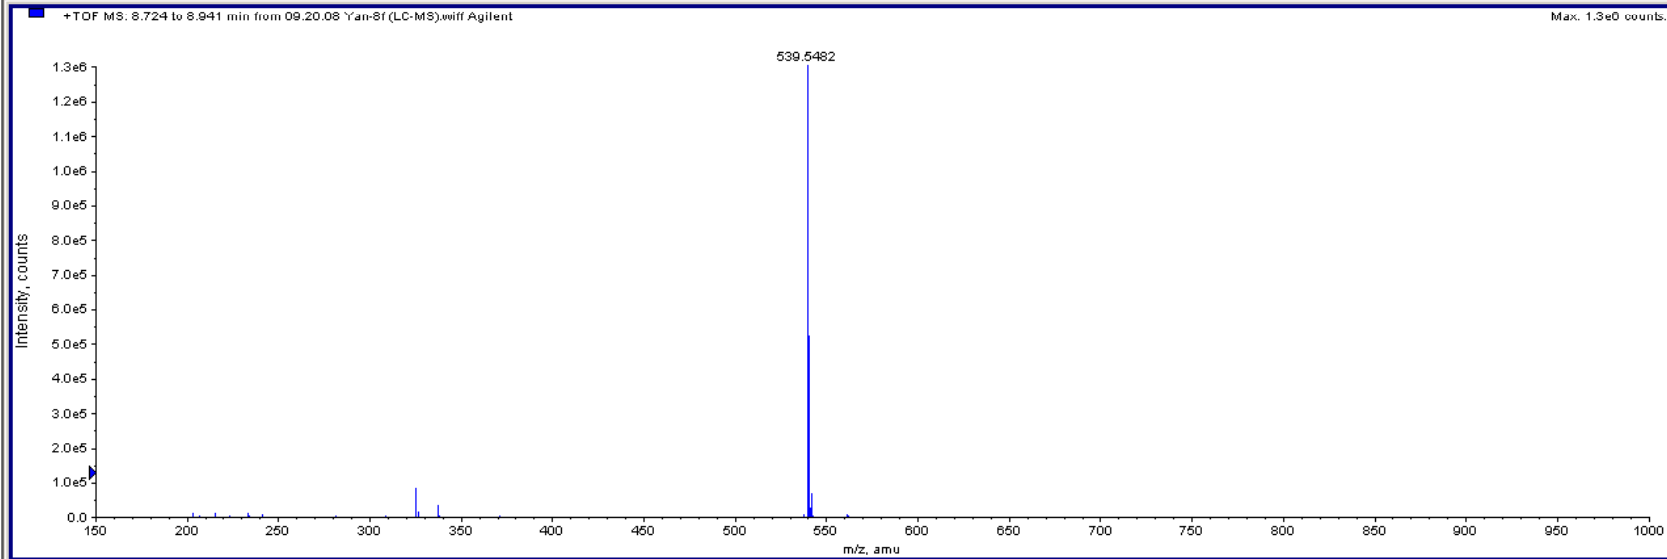

# <sup>1</sup>H NMR Spectrum

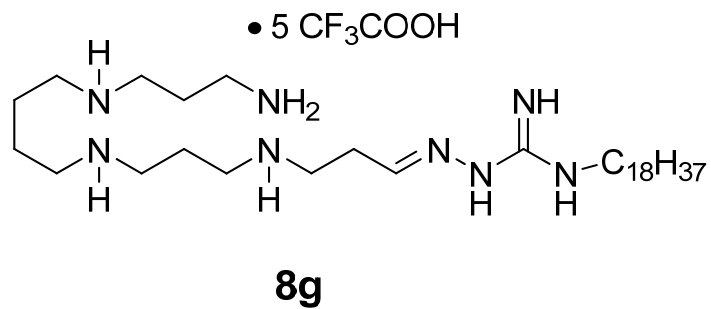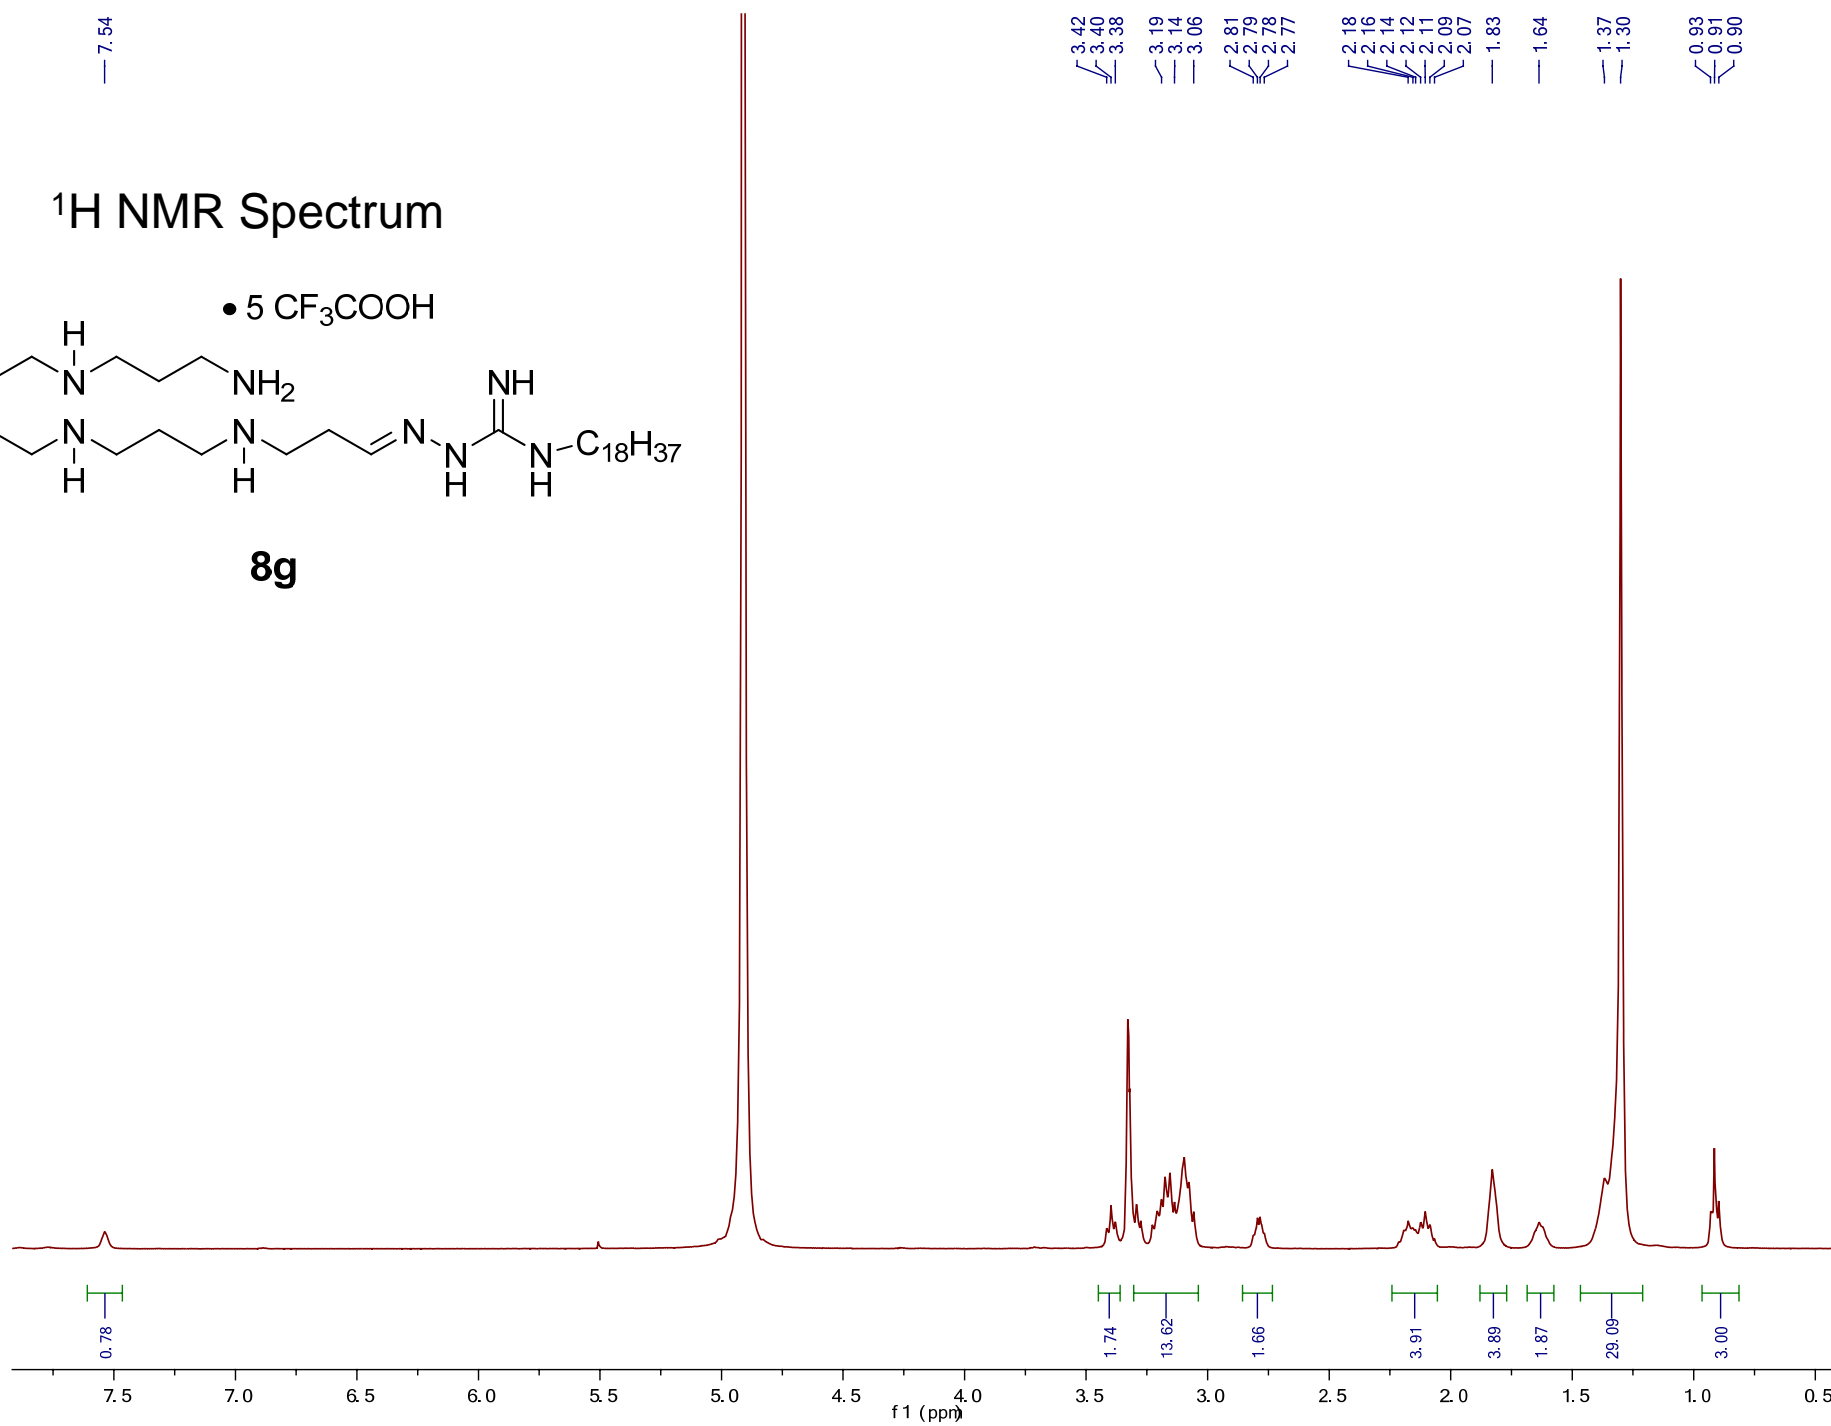

— 154.78

147.09  
147.03

# <sup>13</sup>C NMR Spectrum

• 5 CF<sub>3</sub>COOH

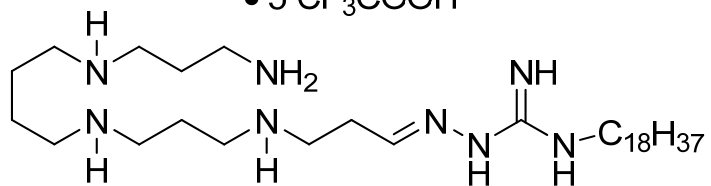

**8g**

45.02  
44.84  
44.14  
41.57  
36.83  
32.09  
28.95  
26.71  
24.38  
23.23  
23.12  
22.75  
13.47

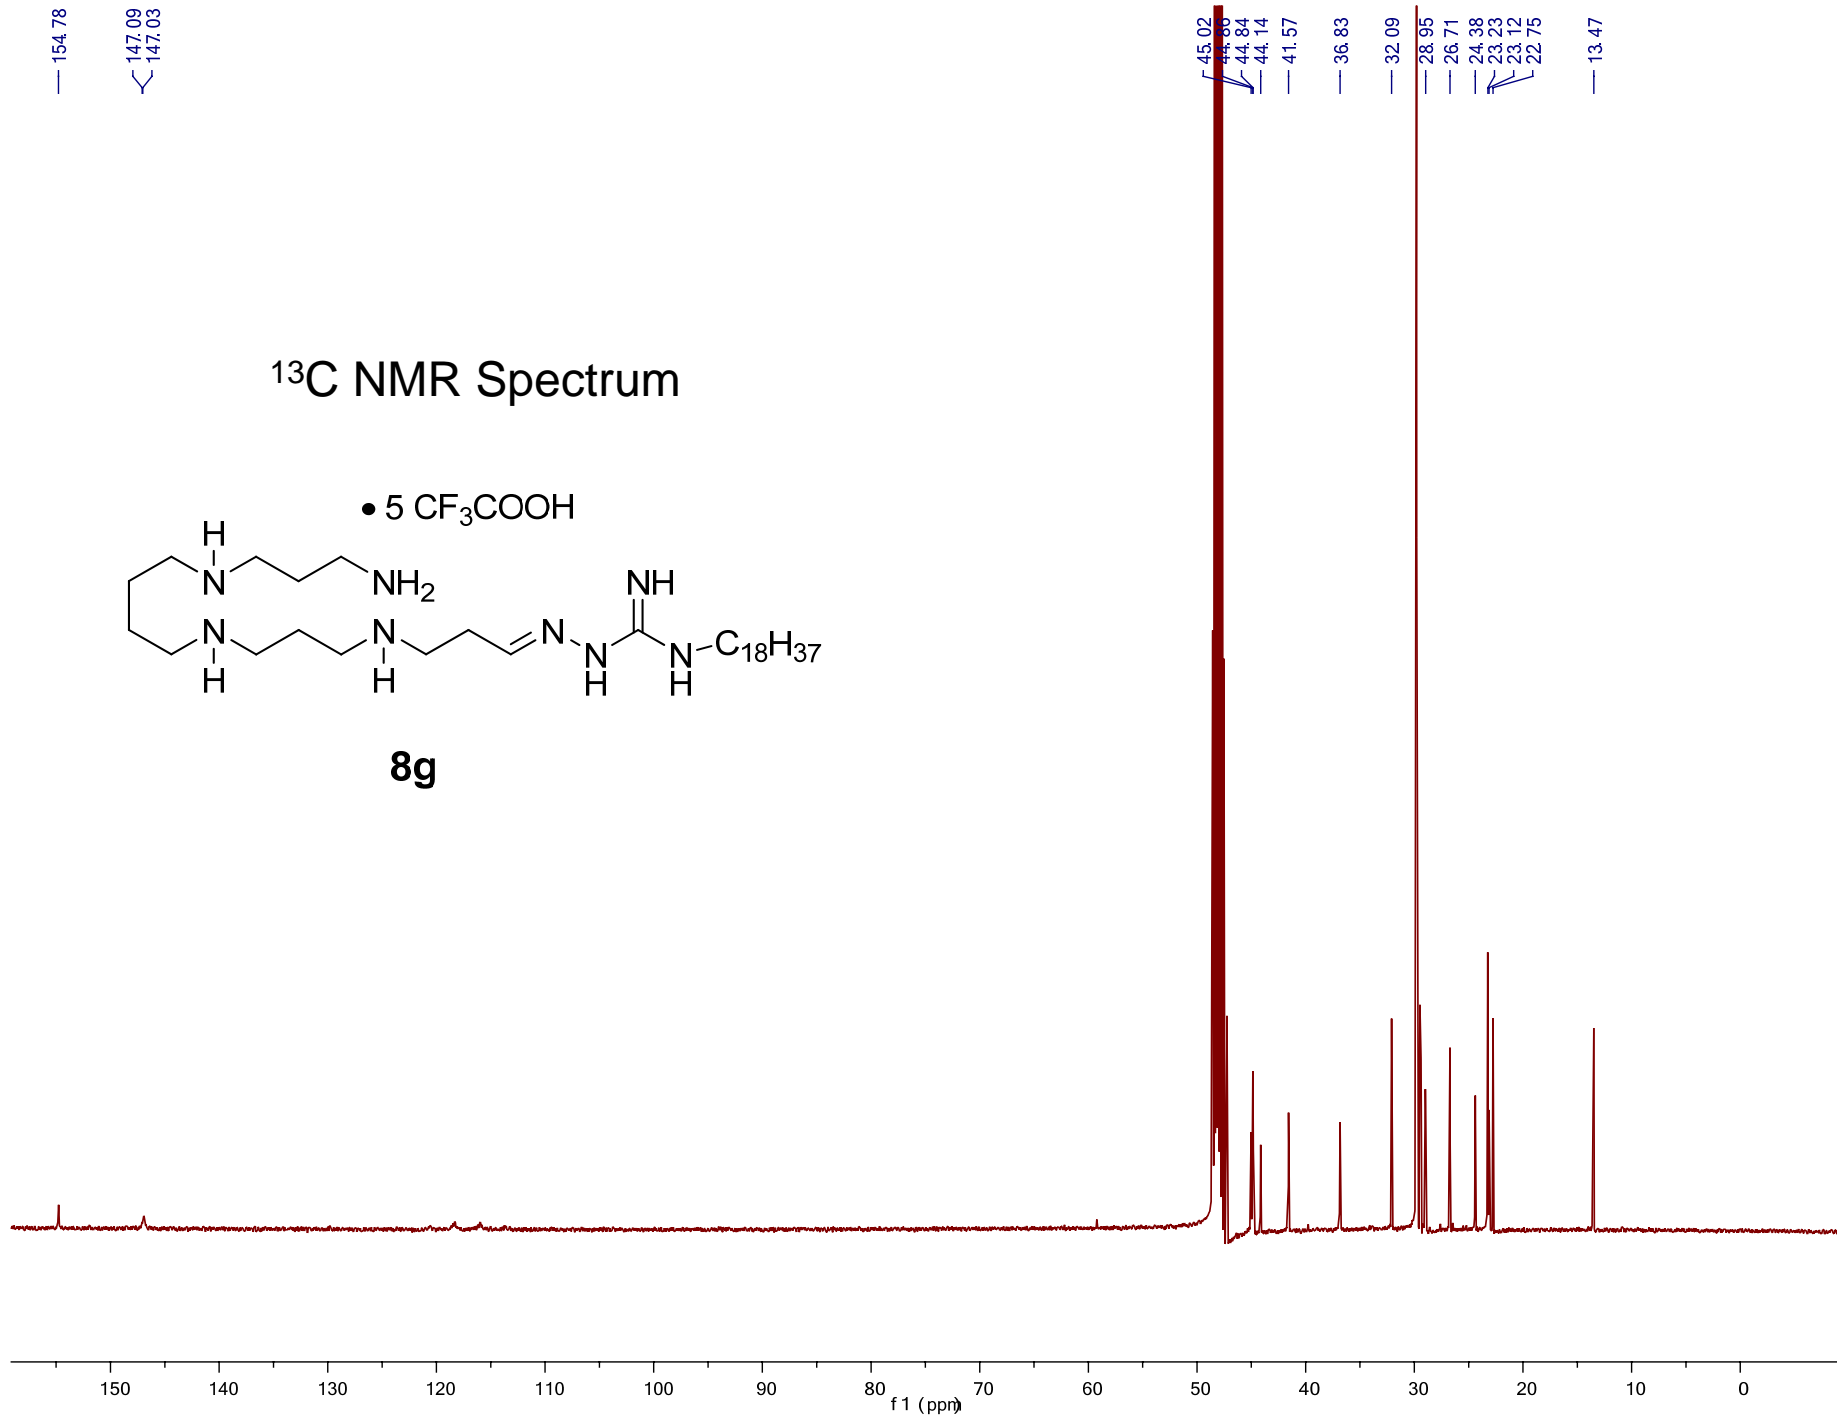

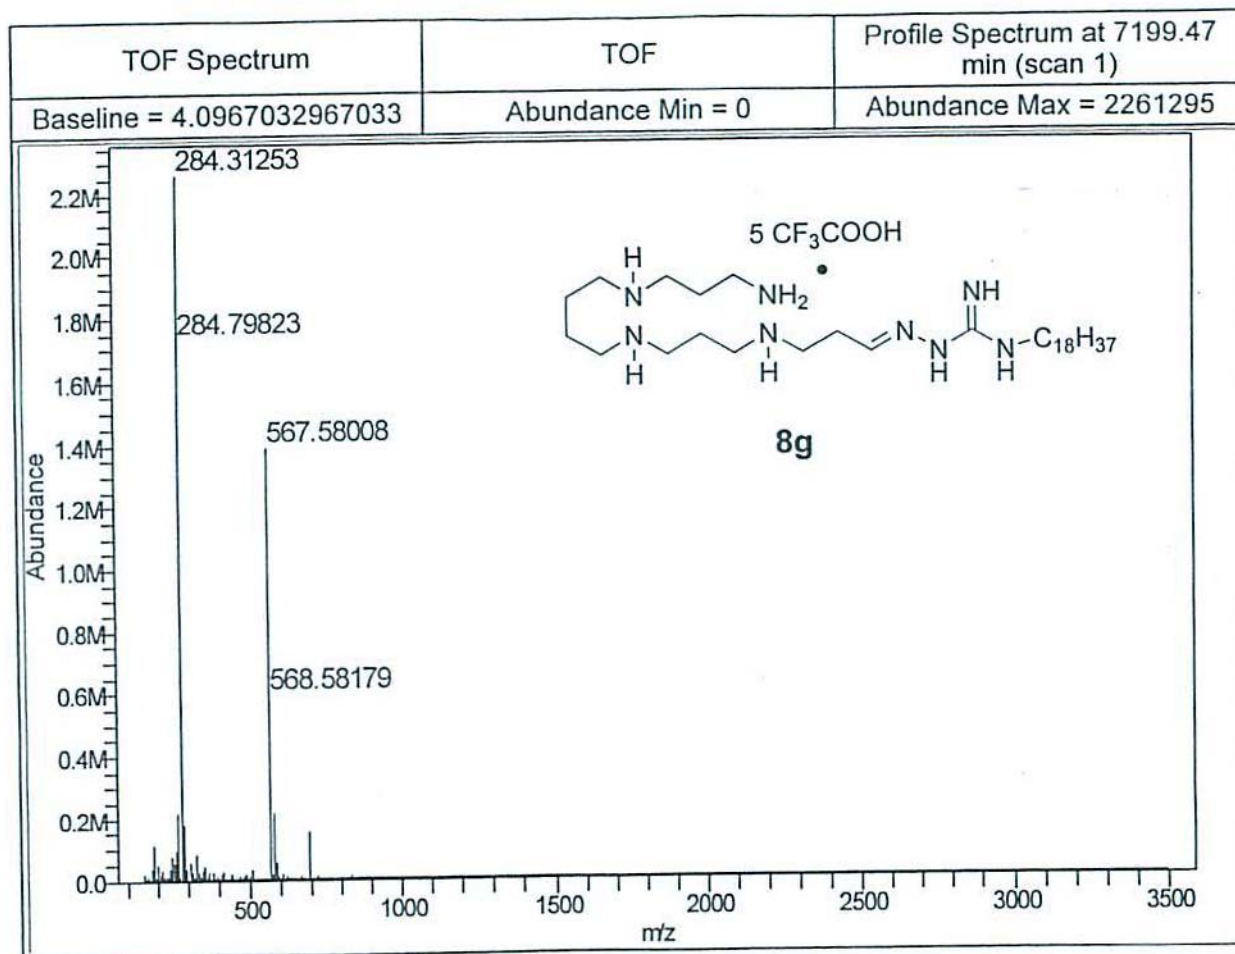

### LC-MS Data: Compound 8g

Column: C8 RP-HPLC (3.0 X 150 mm; stable-bond 3.5  $\mu$ M analytical)

Solvent system: Water (0.1% TFA) [A] / CH<sub>3</sub>CN (0.1%TFA) [B]; 5-100% B in 15 minutes; Flow-rate: 0.4 ml/min

Detection: Agilent ESI-TOF instrument (positive mode, 30 ppm accuracy)

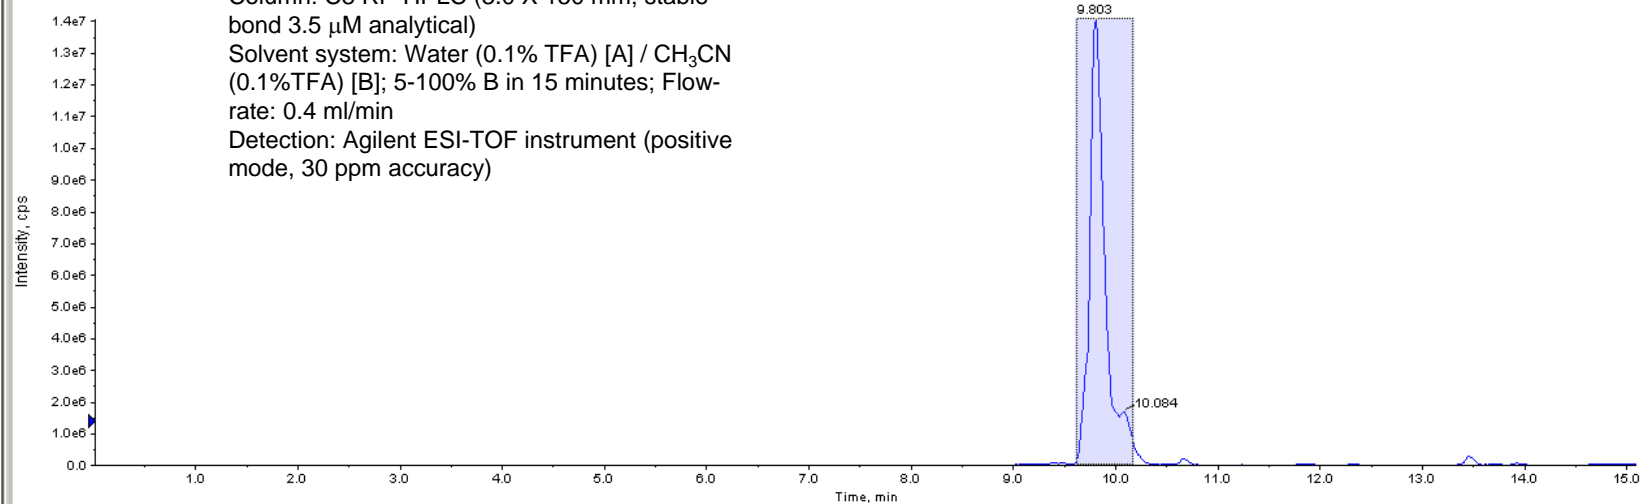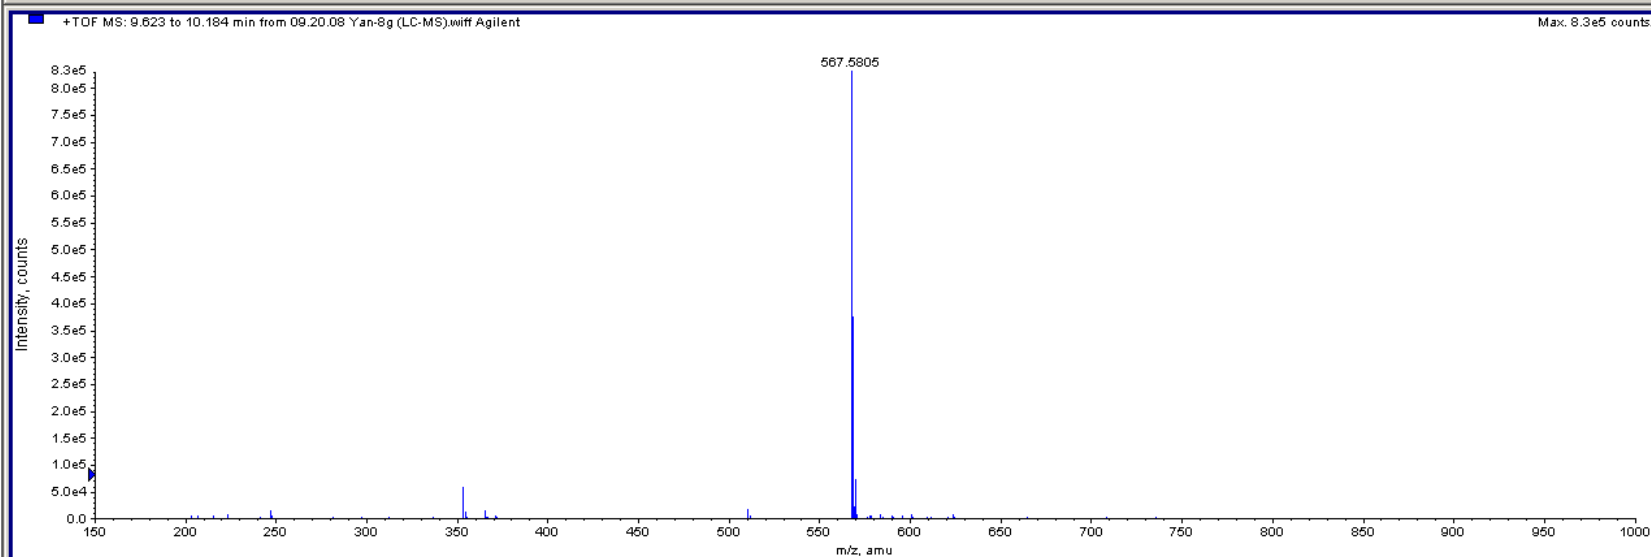

# $^1\text{H}$ NMR Spectrum

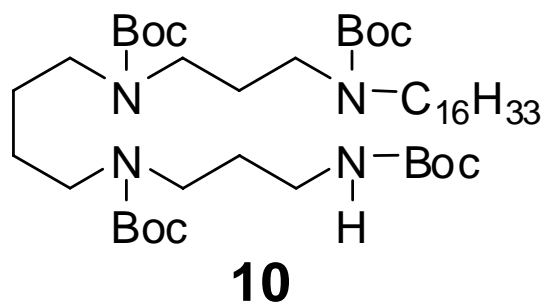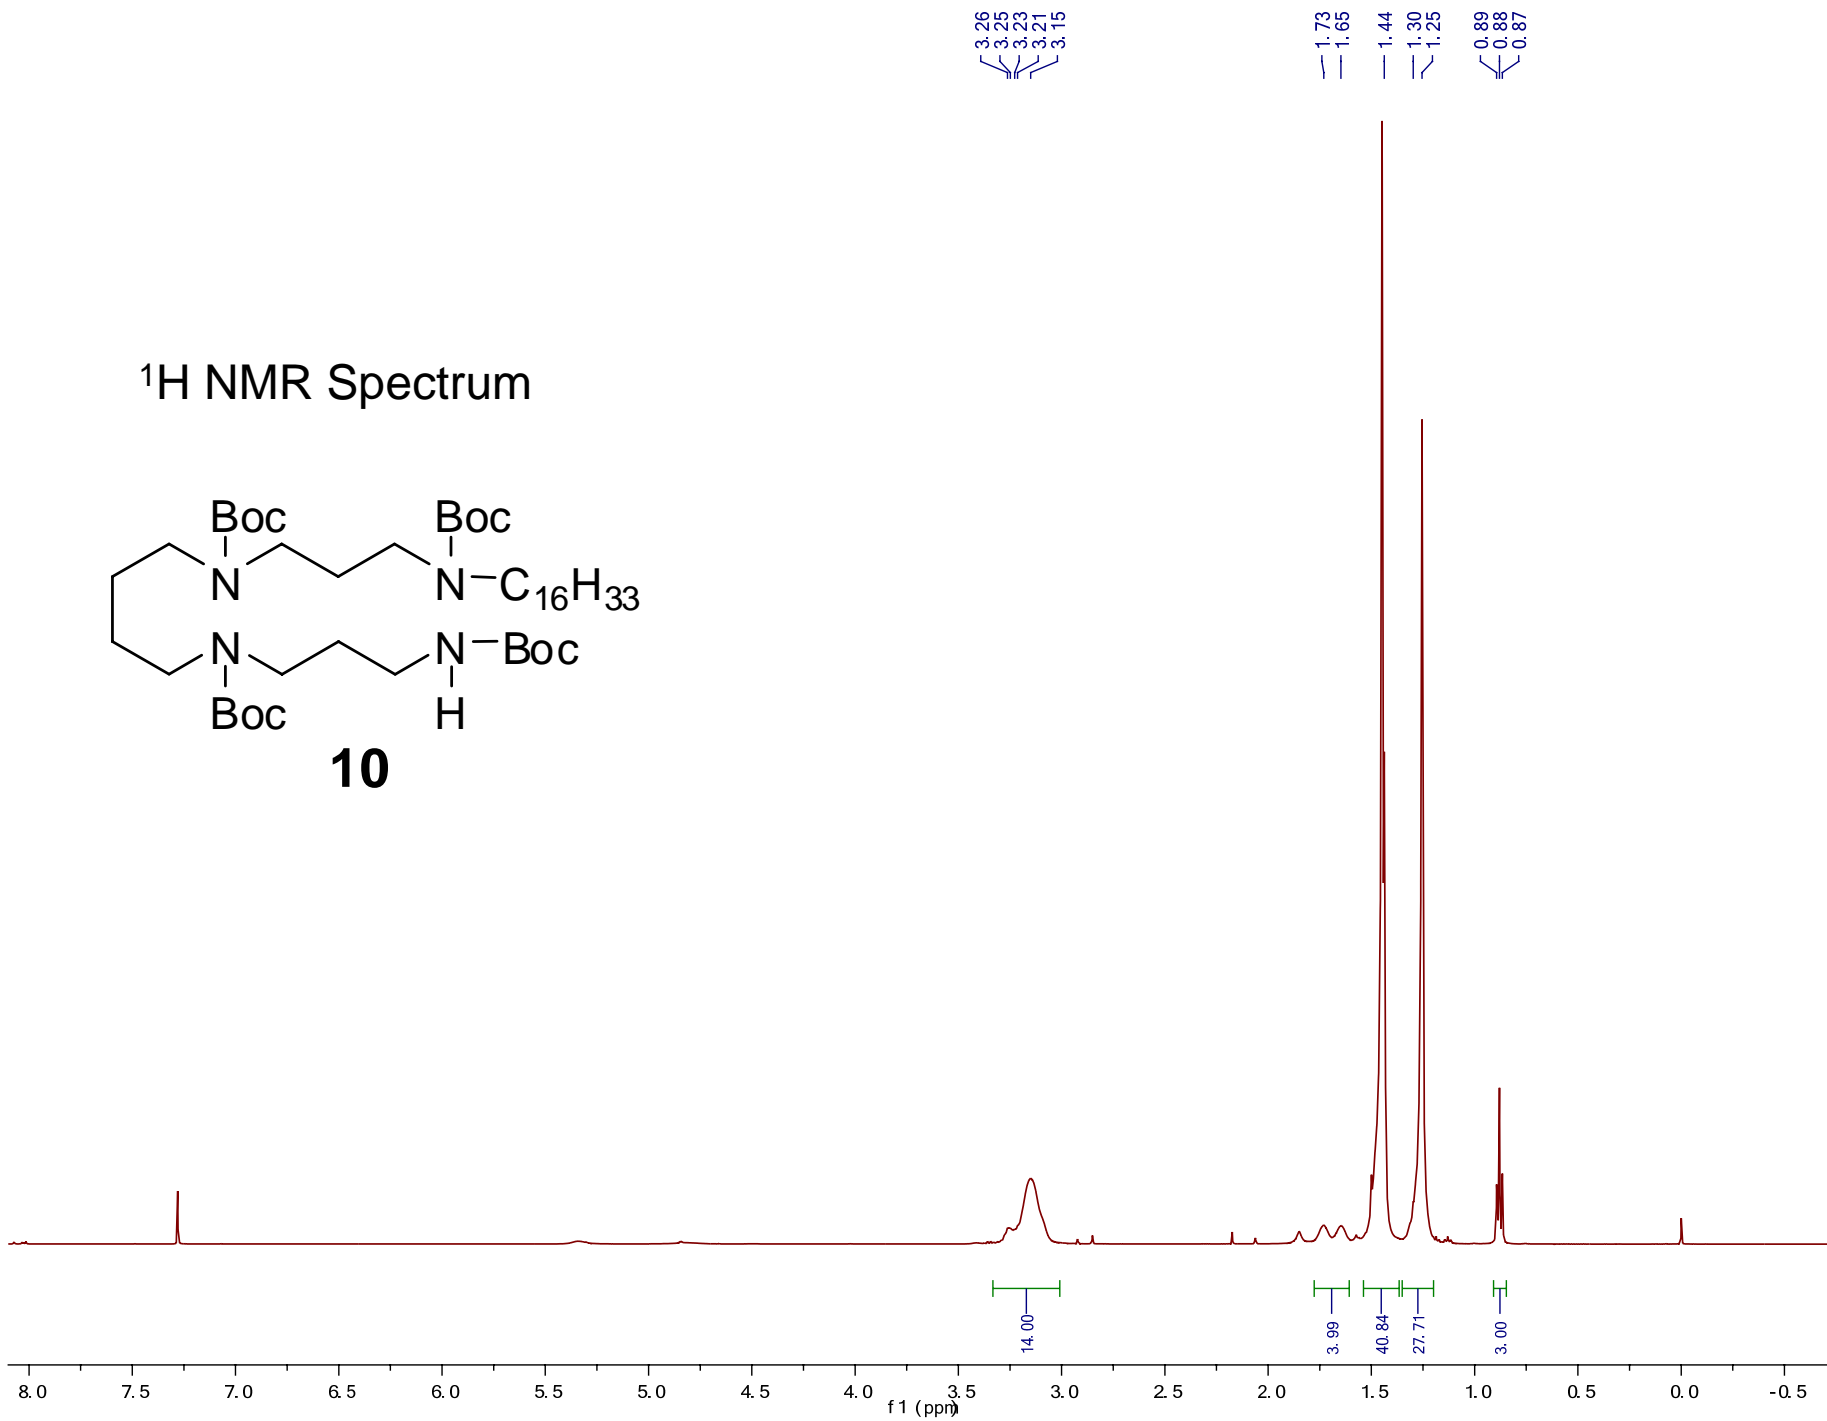

156.11  
155.95  
155.48

79.27  
79.12

47.10  
46.80  
46.63  
46.52  
44.90  
44.66  
44.60  
44.18  
43.68

37.66  
37.29  
31.93  
29.43  
26.87  
25.55  
22.69

14.13

### <sup>13</sup>C NMR Spectrum

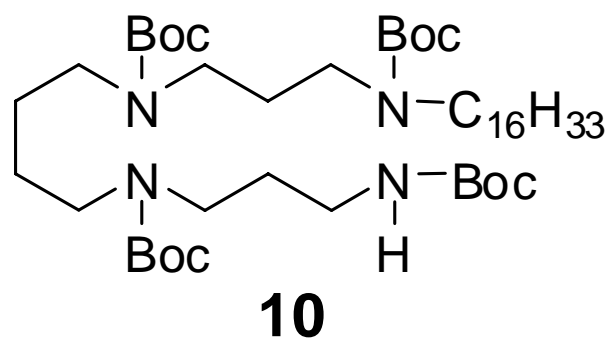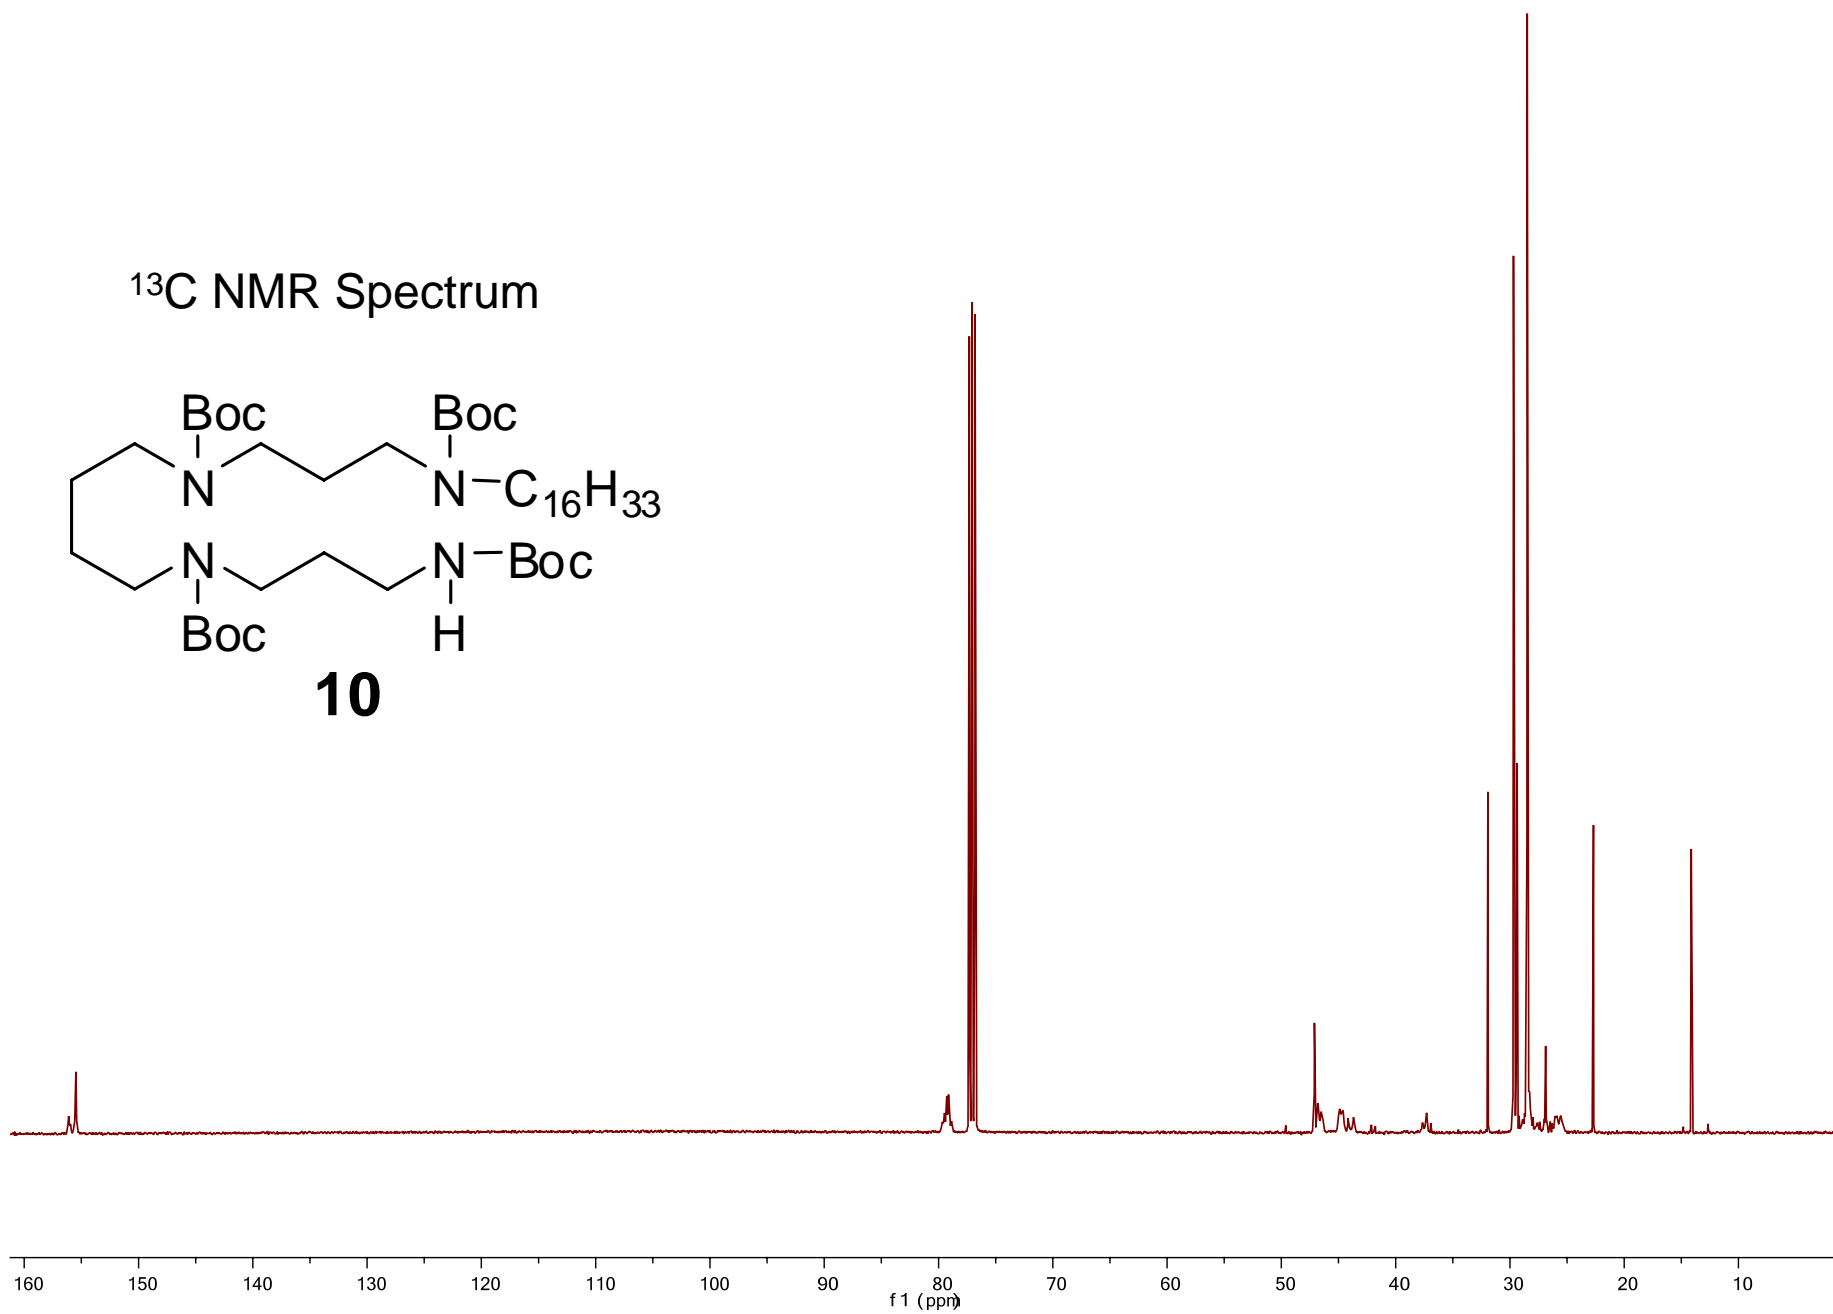



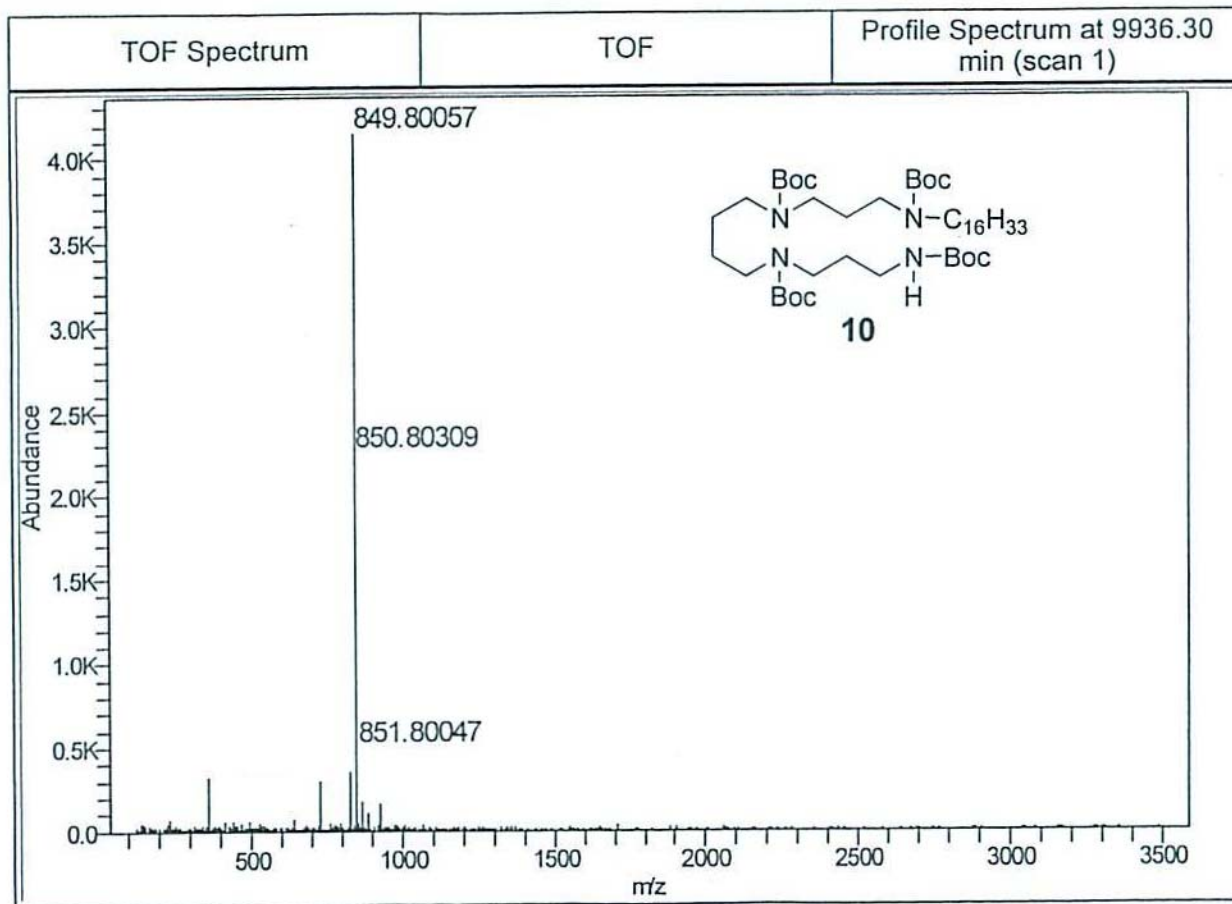





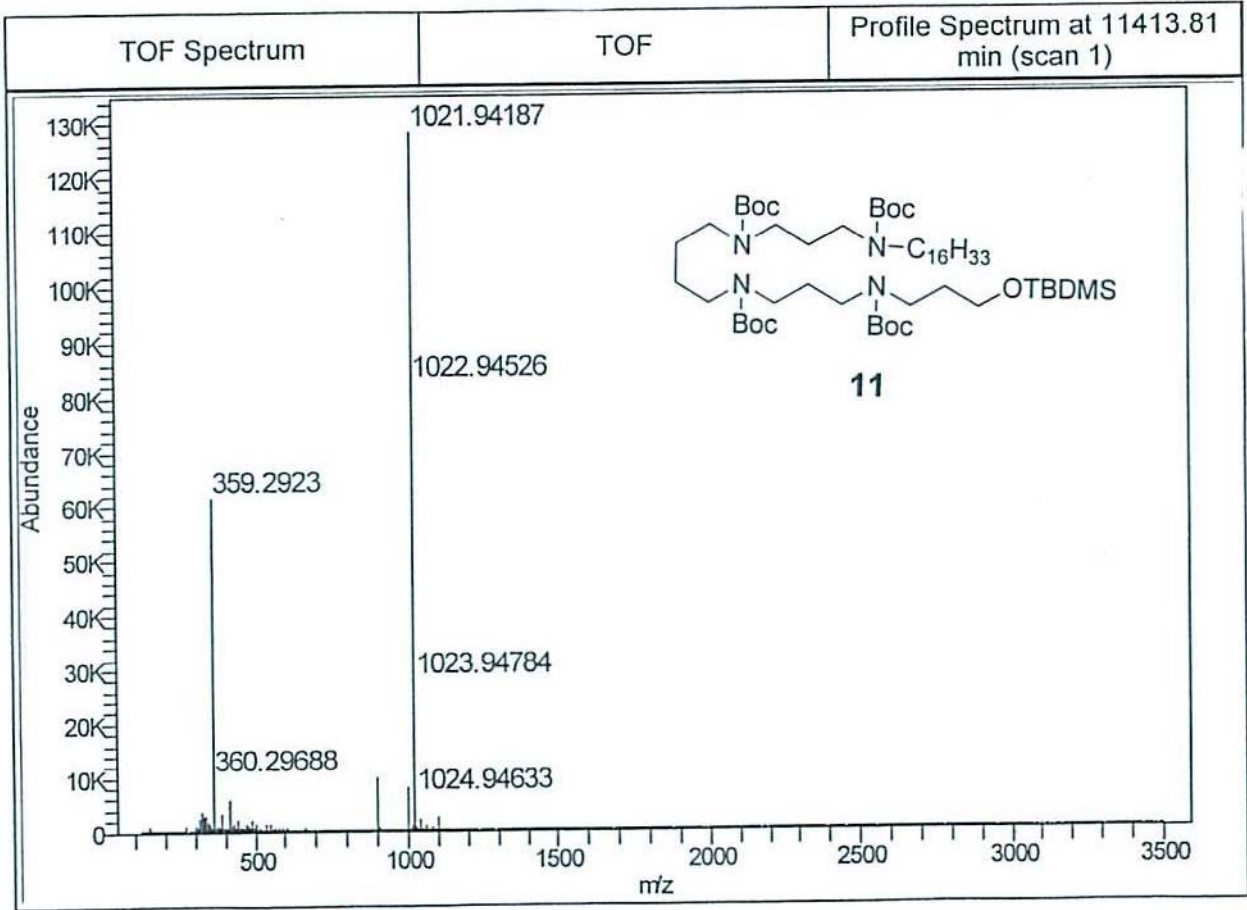

— 9.79

— 3.51

— 3.16

— 2.70

— 1.73

— 1.25

— 0.89

— 0.88

— 0.87

### <sup>1</sup>H NMR Spectrum

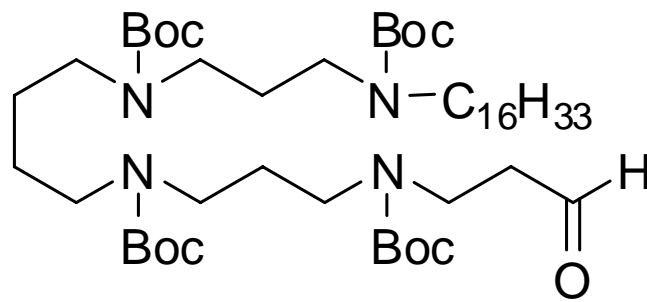

**12**

1  
2

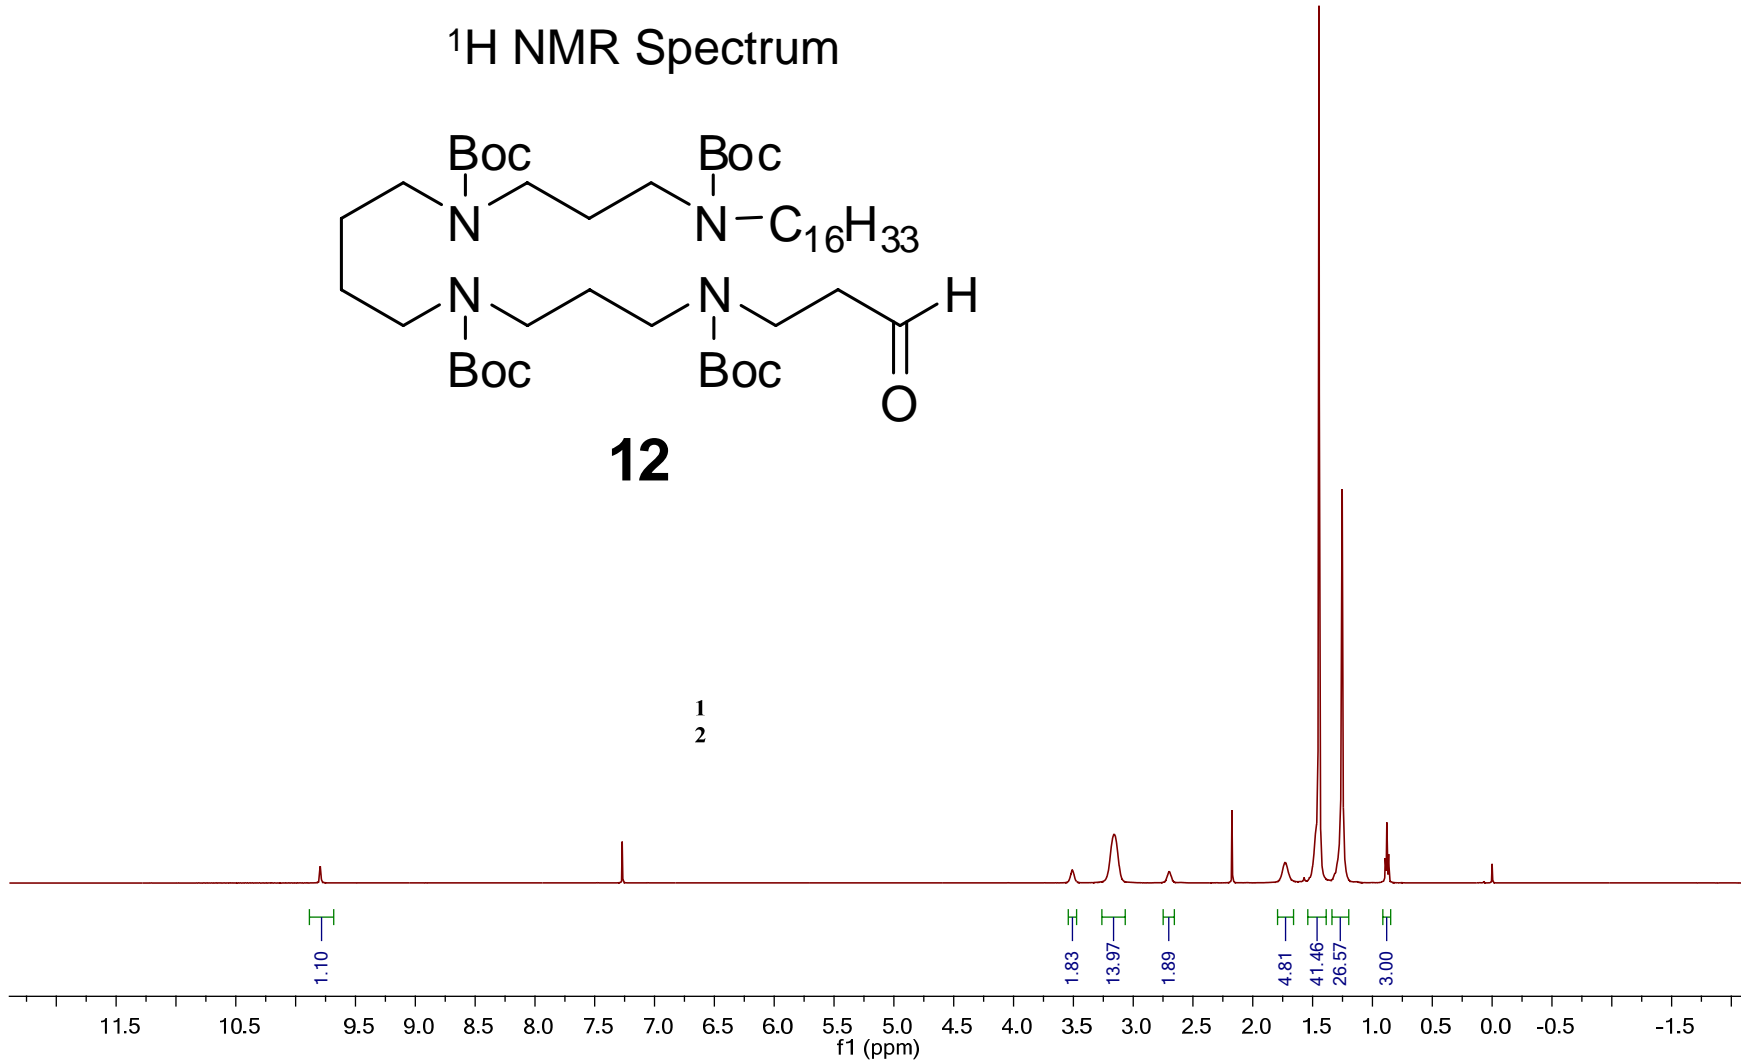

— 200.99

— 155.47

79.93  
79.34  
79.25  
79.11

47.08  
45.82  
45.80  
45.16  
44.69  
44.63  
44.61  
43.63  
43.32  
41.12  
41.09

29.67  
29.43  
28.42  
27.52  
25.60  
22.69

— 14.13

### <sup>13</sup>C NMR Spectrum

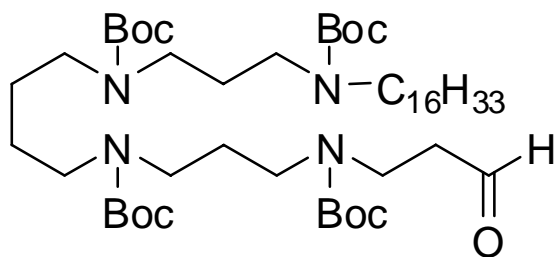

**12**

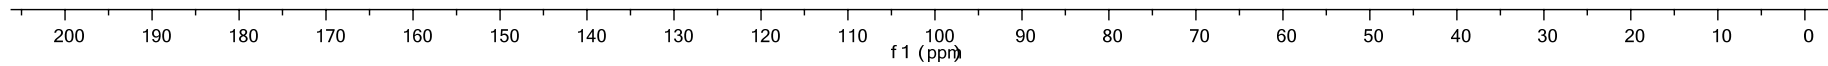

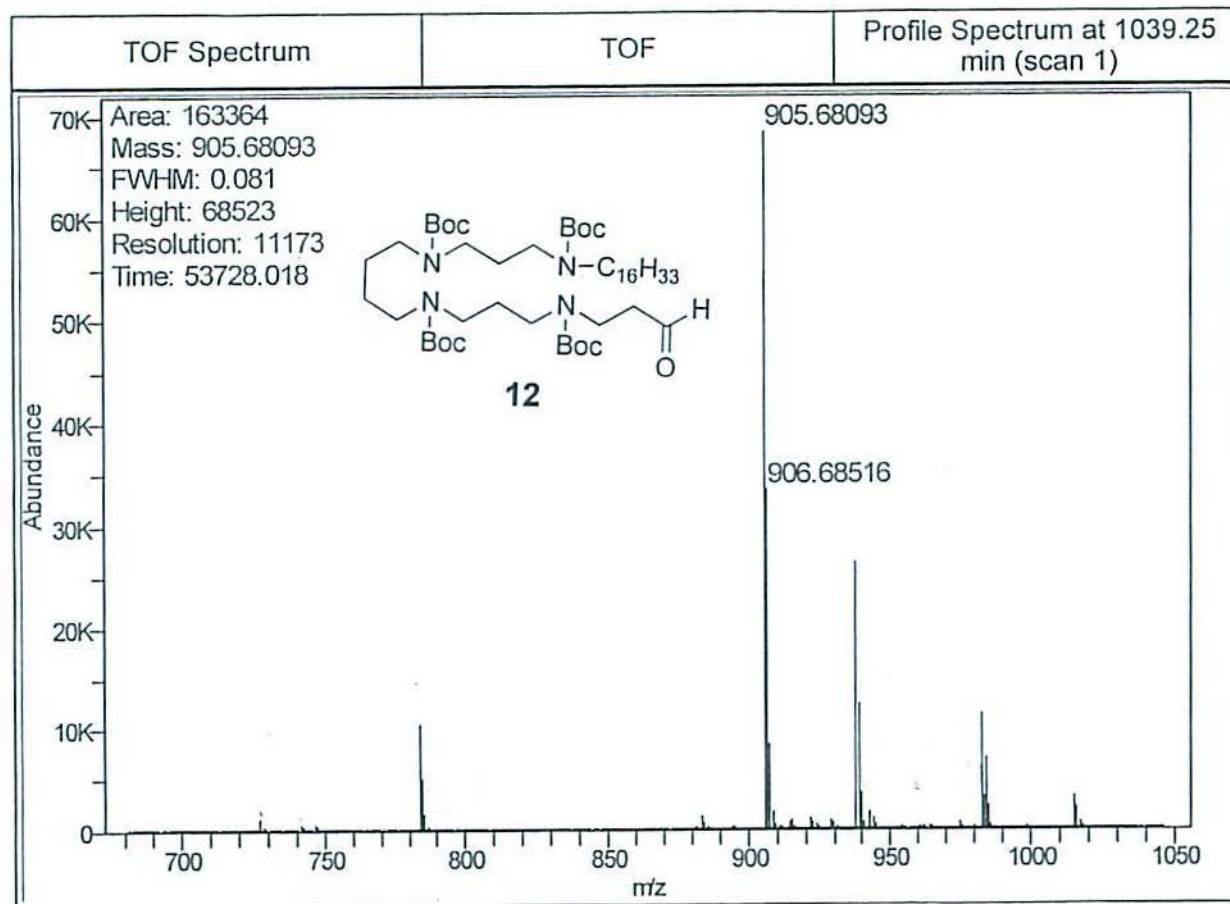





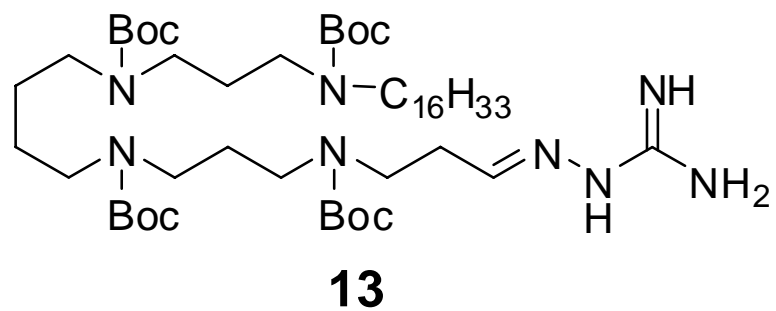

### <sup>13</sup>C NMR Spectrum

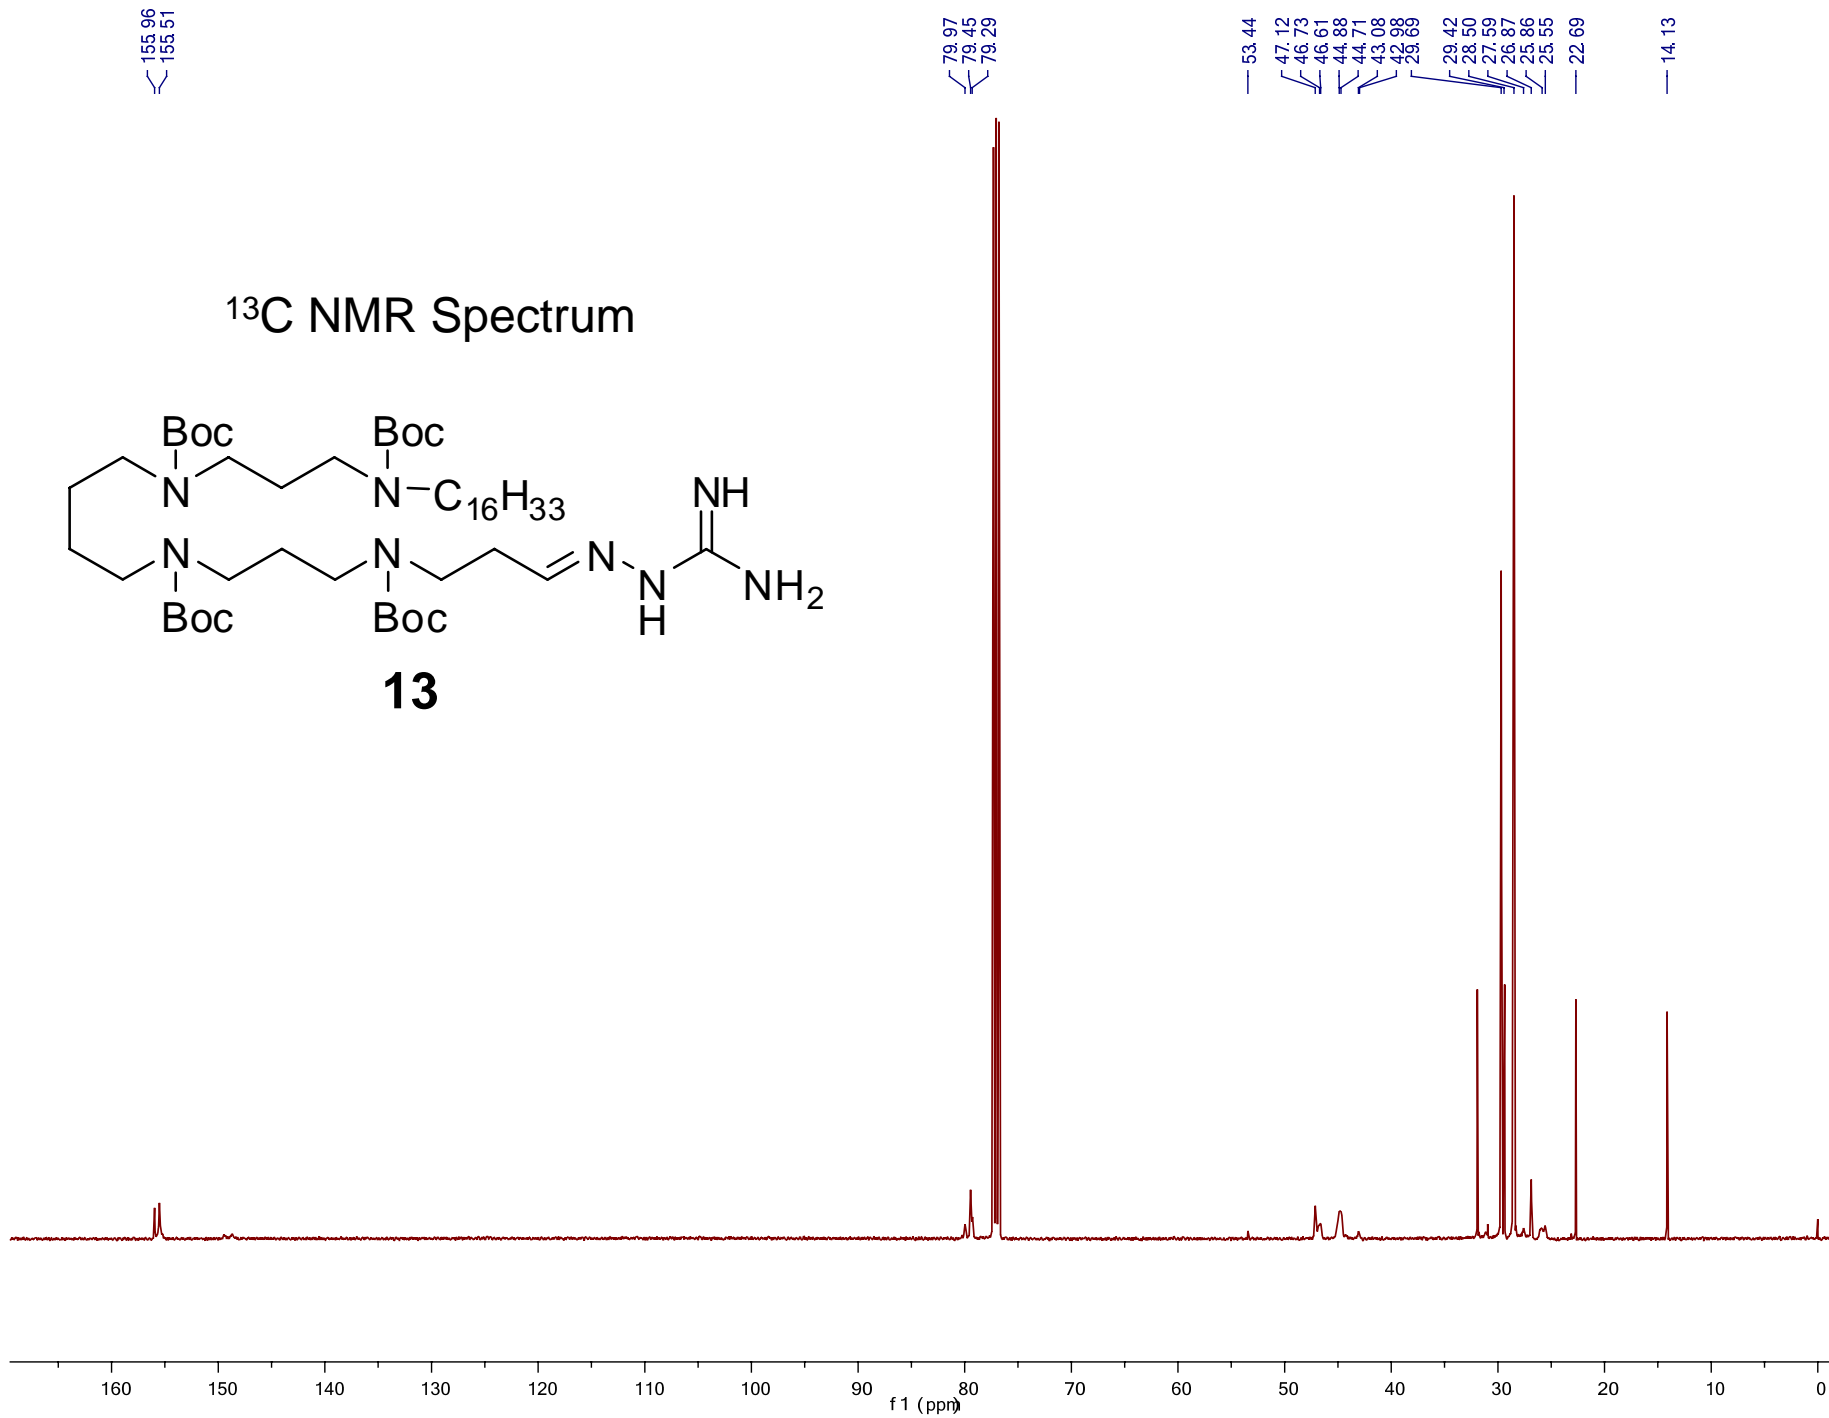



# $^1\text{H}$ NMR Spectrum

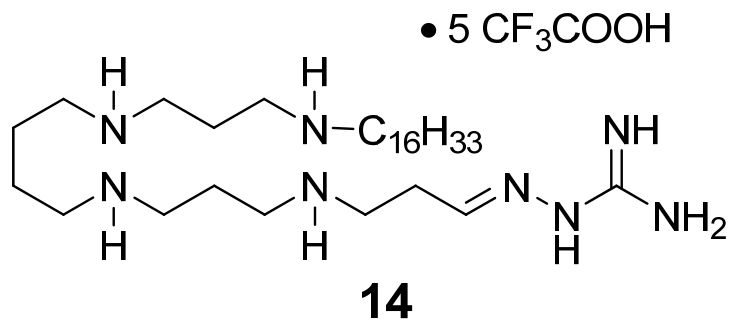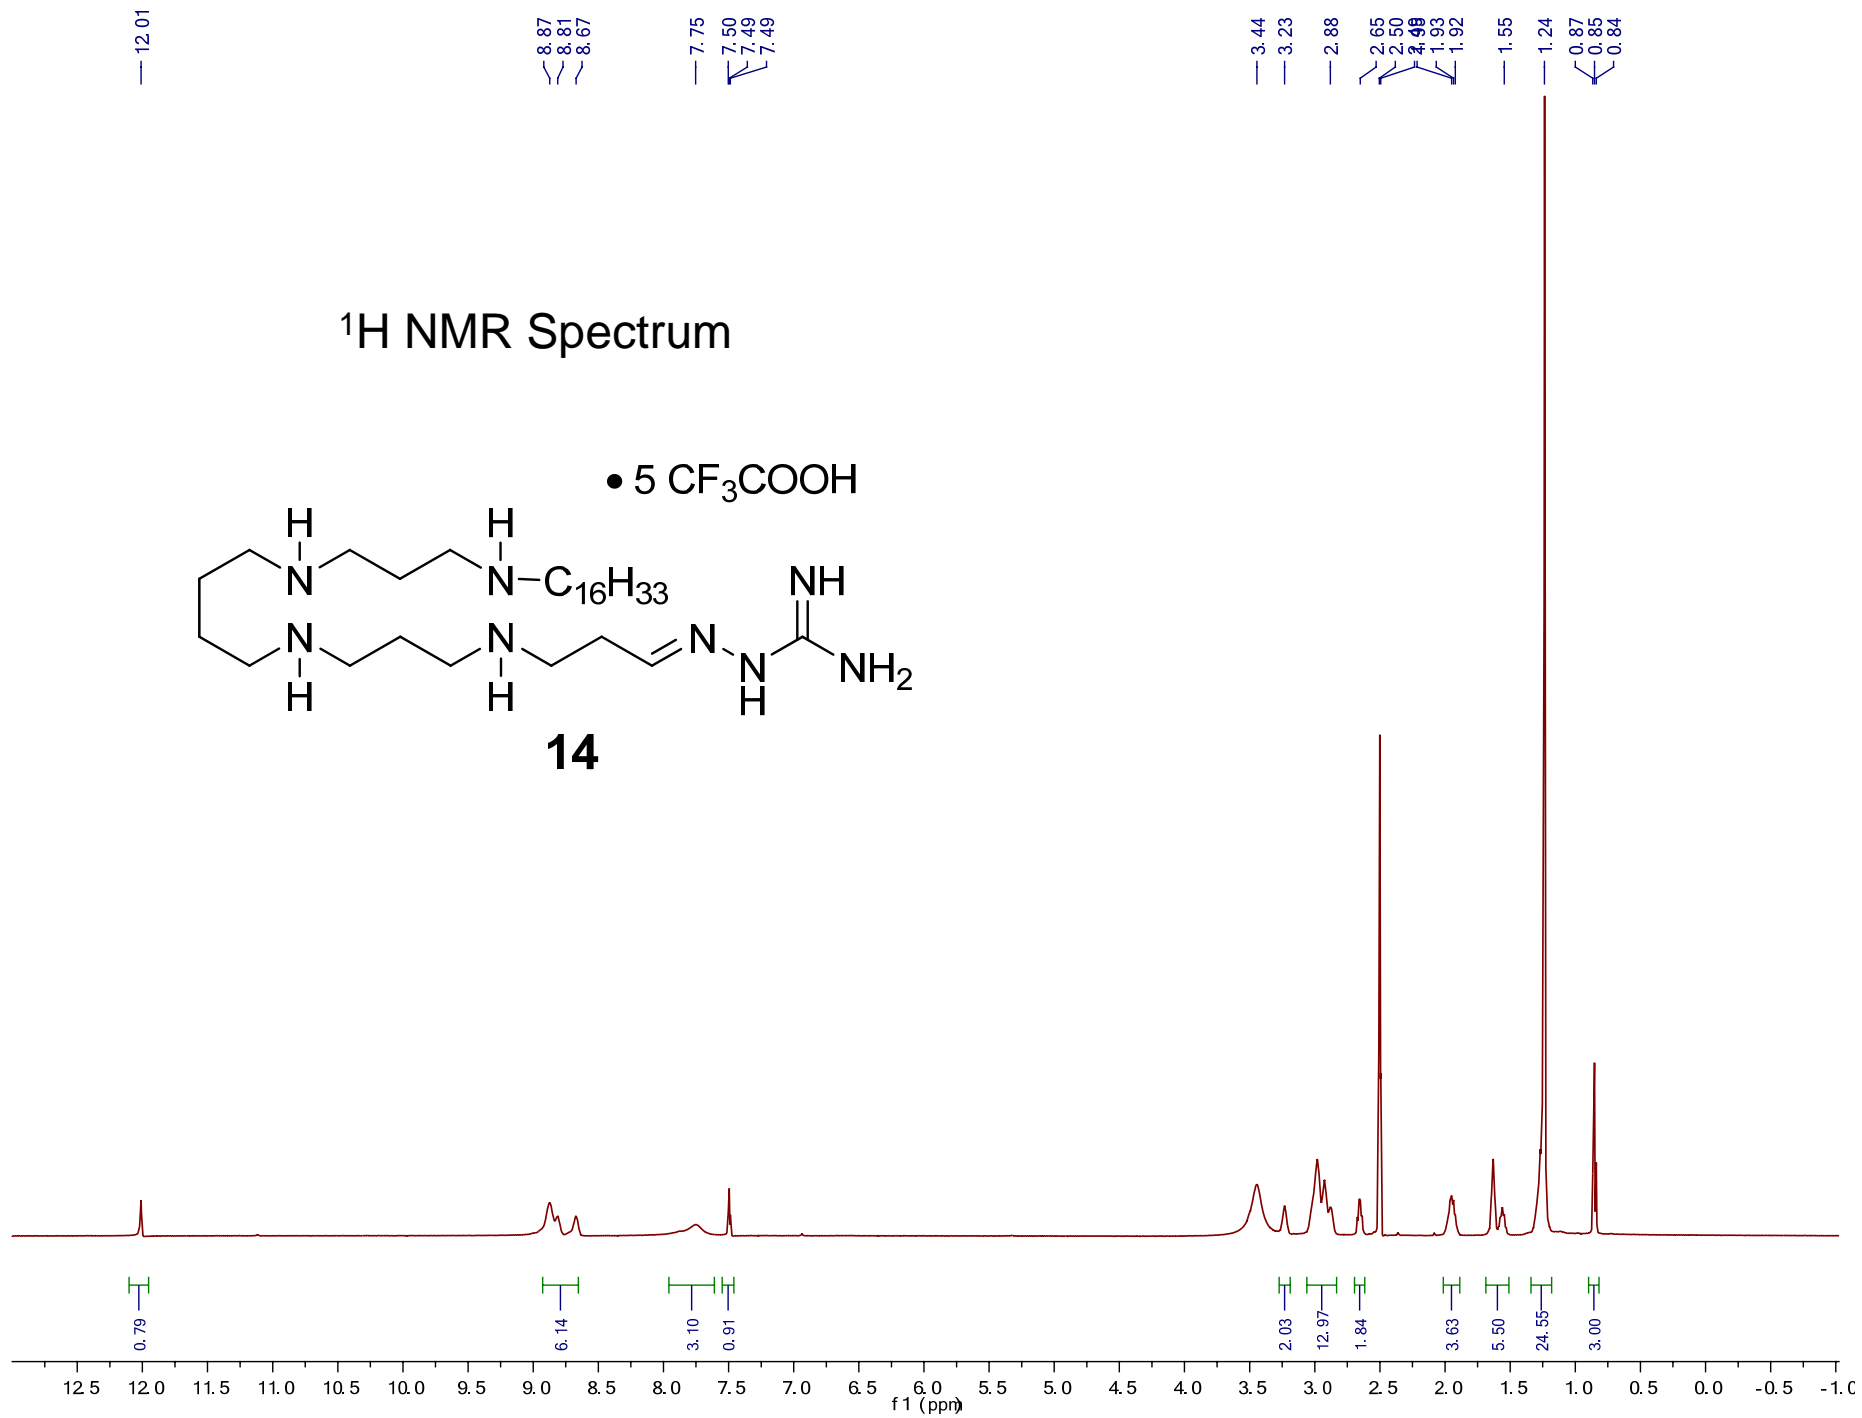

# <sup>13</sup>C NMR Spectrum

• 5 CF<sub>3</sub>COOH

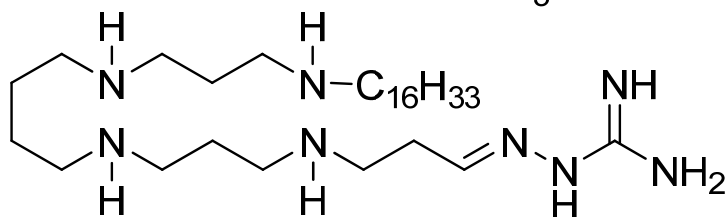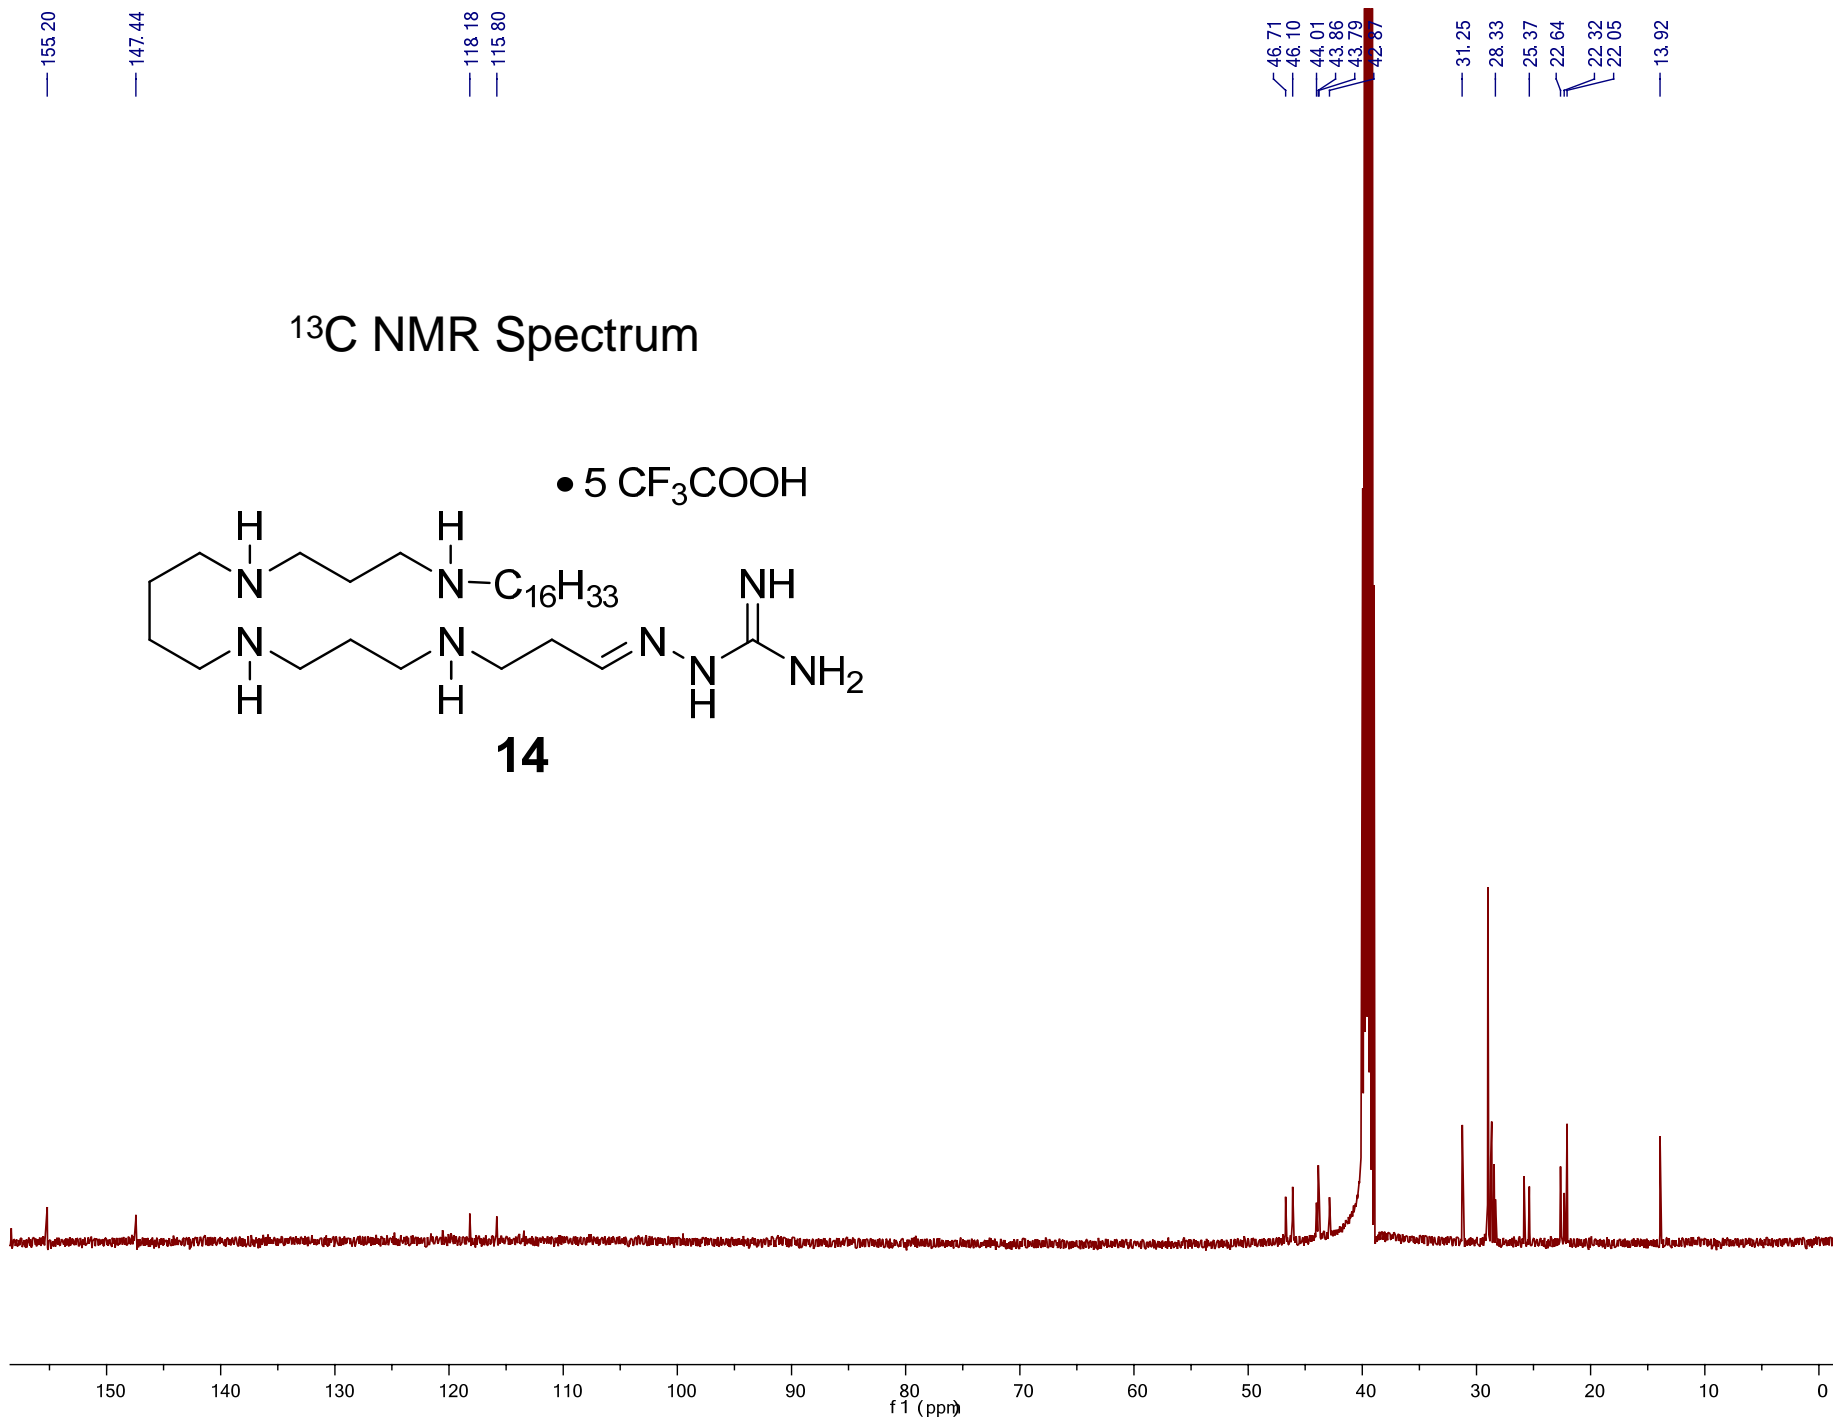

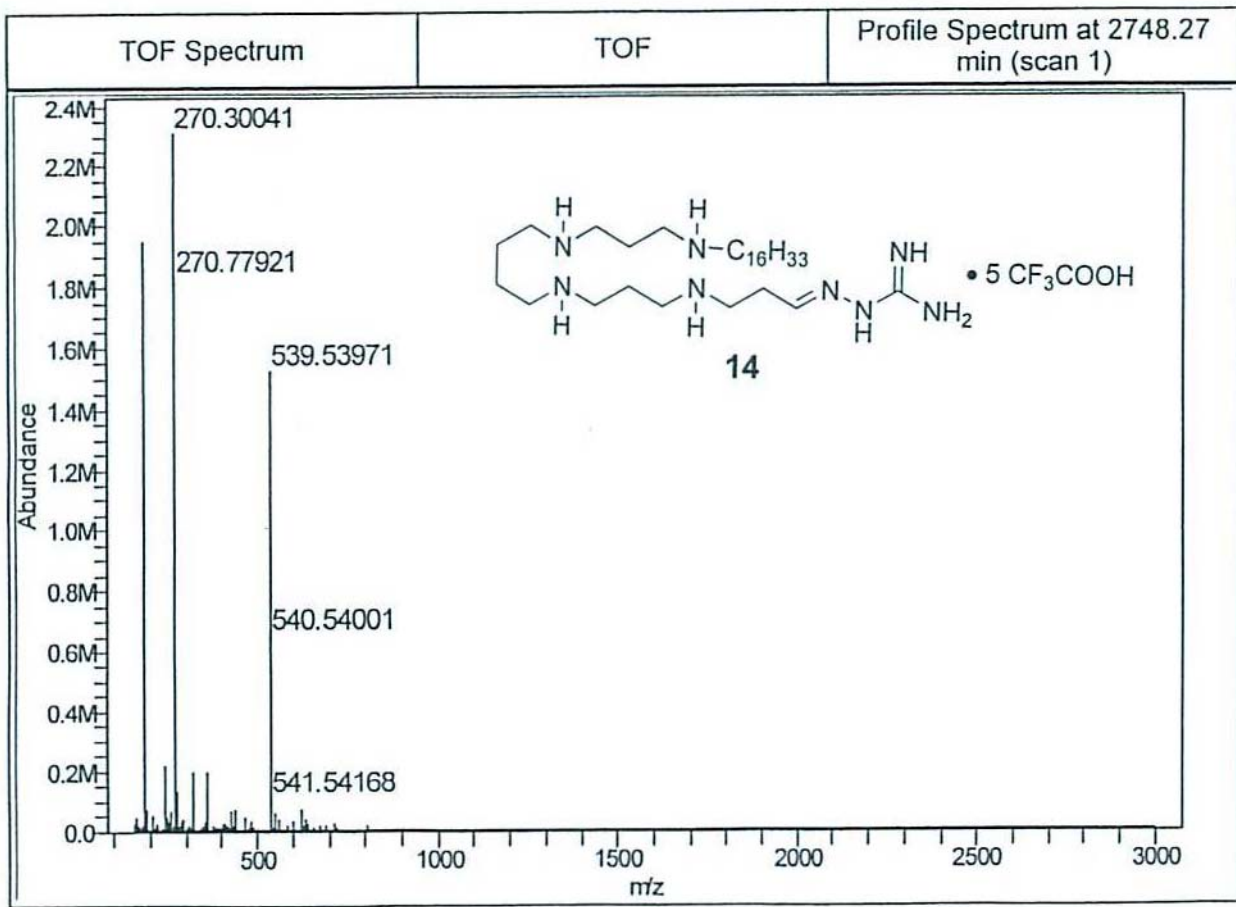

### LC-MS Data: Compound 14

Column: C8 RP-HPLC (3.0 X 150 mm; stable-bond 3.5  $\mu$ M analytical)

Solvent system: Water (0.1% TFA) [A] / CH<sub>3</sub>CN (0.1%TFA) [B]; 5-100% B in 15 minutes; Flow-rate: 0.4 ml/min

Detection: Agilent ESI-TOF instrument (positive mode, 30 ppm accuracy)

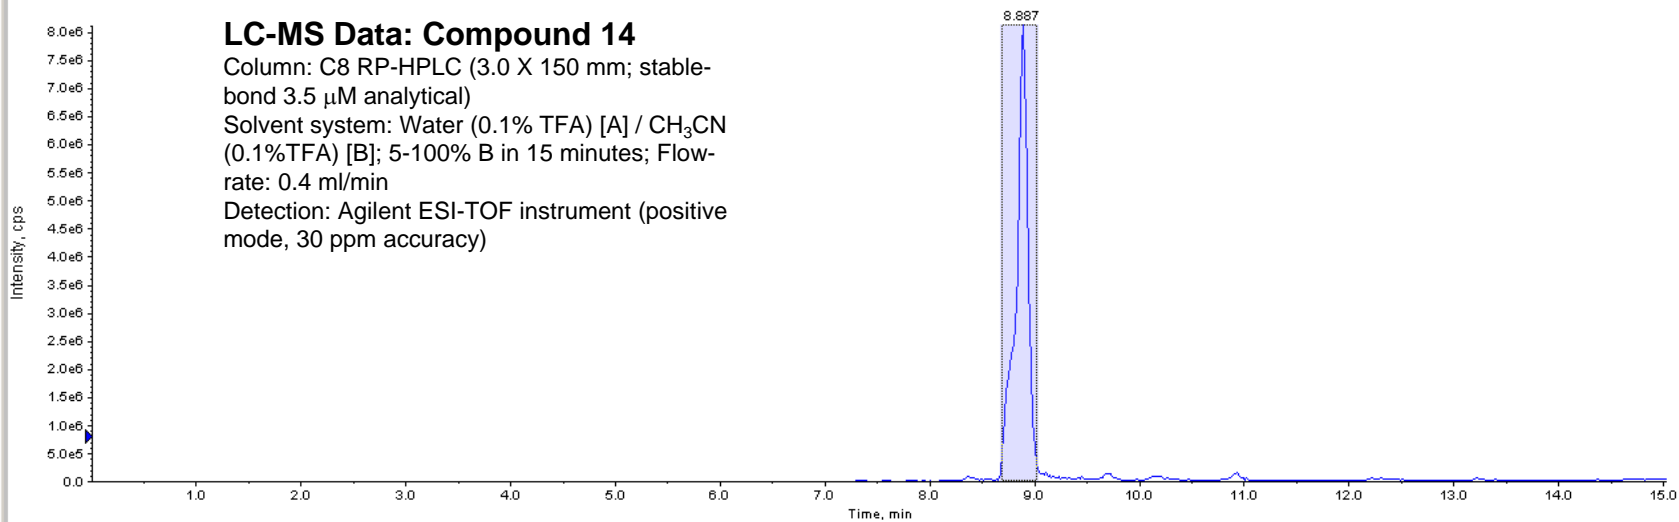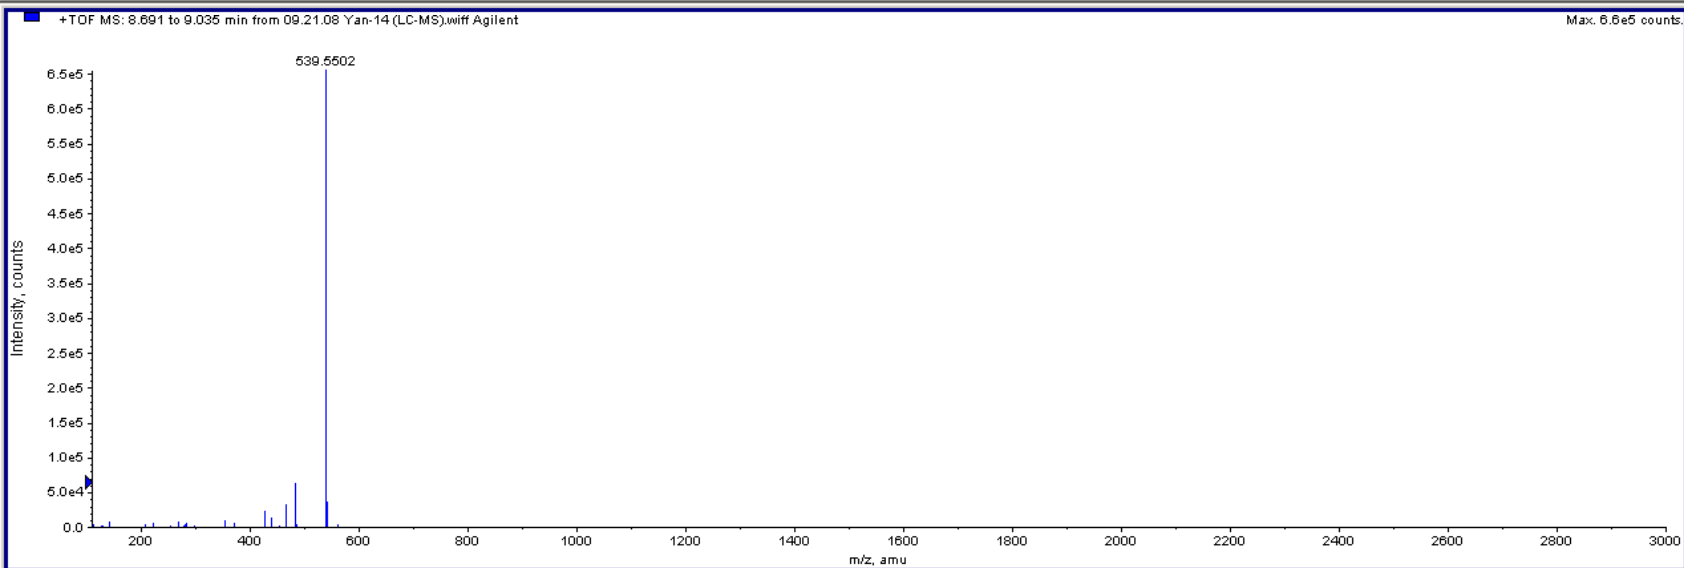

Supplement: NIHMS482847-supplement-Supplementary_Data.pdf [file NIHMS482847-supplement-Supplementary_Data.pdf]
